# Supplementary material for: A transcriptional MAPK Pathway Activity Score (MPAS) is a clinically relevant biomarker in multiple cancer types
Source: PubMed Central journal article supplement (PMC5871852; doi:10.1038/s41698-018-0051-4), 2018-03-07
Supplement: 41698_2018_51_MOESM1_ESM.pdf [file 41698_2018_51_MOESM1_ESM.pdf]

## **A transcriptional MAPK Pathway Activity Score (MPAS) is a clinically relevant biomarker in multiple cancer types**

Marie-Claire Wagle<sup>1,2\*</sup>, Daniel Kirouac<sup>1,3</sup>, Christiaan Klijn<sup>4</sup>, Bonnie Liu<sup>2</sup>, Shilpi Mahajan<sup>2</sup>, Melissa Junttila<sup>5</sup>, John Moffat<sup>6</sup>, Mark Merchant<sup>5</sup>, Ling Huw<sup>2</sup>, Matthew Wongchenko<sup>2</sup>, Kwame Okrah<sup>7</sup>, Shrividhya Srinivasan<sup>2</sup>, Zineb Mounir<sup>2</sup>, Teiko Sumiyoshi<sup>2</sup>, Peter M. Haverly<sup>4</sup>, Robert L. Yauch<sup>5</sup>, Yibing Yan<sup>2</sup>, Omar Kabbarah<sup>2</sup>, Garret Hampton<sup>2</sup>, Lukas Amler<sup>2</sup>, Saroja Ramanujan<sup>3</sup>, Mark R. Lackner<sup>2</sup> and Shih-Min A. Huang<sup>2\*</sup>.

<sup>1</sup>These authors contributed equally to this work, Departments of <sup>2</sup>Oncology Biomarker Development, <sup>3</sup>Pre-Clinical and Translational PKPD, <sup>4</sup>Bioinformatics, <sup>5</sup>Translational Oncology, <sup>6</sup>Biochemical and Cellular pharmacology, <sup>7</sup>Biostatistics, Genentech, 1 DNA Way, South San Francisco, CA 94080, USA.

\*CORRESPONDENCE: Marie-Claire Wagle: Genentech, 1 DNA Way, South San Francisco, CA 94080, USA, ph: 650-467-3256, marieclw@gene.com. Shih-Min A. Huang (*current affiliation*): Bristol-Myers Squibb, 3551 Lawrenceville Princeton, Lawrence Township, NJ 08648, ph: 650-452-2026, alex.huang1@bms.com.

### **Supplementary Materials**

## **Supplementary Figures**

**Supplementary Figure 1:** Expression and correlation of the 10 MAPK genes that constitute MPAS in colorectal, lung and pancreatic patient samples.

**Supplementary Figure 2:** Cross-validation of the E-Net model

**Supplementary Figure 3:** Association of BRAF-mutational status or MPAS with overall survival in patients with mCRC or resectable CRC

**Supplementary Figure 4:** Spearman's Rank Correlation coefficients between EGFR, CDKN1B, and ERBB3 gene expression, and MPAS for HER2+ breast cancer patients.

## **Supplementary Tables**

**Supplementary Table 1:** MAPK gene expression in melanoma (MEL-JUSO), lung (NCI-H2347) and pancreatic (HUPT4), % inhibition in response to 0.01-1uM cobimetinib treatment for 72 h.

**Supplementary Table 2:** MAPK gene expression, MPAS and cell viability in response to multiple MAPK inhibitors across cell lines from multiple indications.

**Supplementary Table 3:** Standard deviations of either MPAS or actual mean viability across cell lines treated with either MAPK or PI3K/AKT inhibitors.

**Supplementary Table 4:** Short-list of gene clusters identified by the E-Net model as being predictive of MAPK inhibitor (cobimetinib and trametinib) sensitivity.

**Supplementary Table 5:** Genes with expression that correlates with the PHLDA1 gene cluster identified by the E-Net model.

**Supplementary Table 6:** Gene expression, KRAS mutation status and predicted/actual mean viabilities to both trametinib and cobimetinib for cell lines in NSCLC validation set.

**Supplementary Table 7:** Median, maximum and minimum MPAS values for each clinical study.

**Supplementary Table 8:** List of vendors from which melanoma, crc and lung patient samples were procured.

**Supplementary Table 9:** Genes included in the custom MAPK-specific nanostring panel.

**Supplementary Table 10:** Predicted and actual mean viabilities in response to either trametinib or cobimetinib for cell lines included in the E-Net training set.

**Supplementary Table 11:** MPAS and PFS of patients included in the vemurafenib arm of the CoBrim trial.

**Supplementary Table 12:** Individual MAPK gene expression, MPAS and overall survival of patients with metastatic CRC.

**Supplementary Table 13:** Individual MAPK gene expression, MPAS and overall survival of patients with CRC in the adjuvant setting (AVANT).



# Supplementary Figure 1

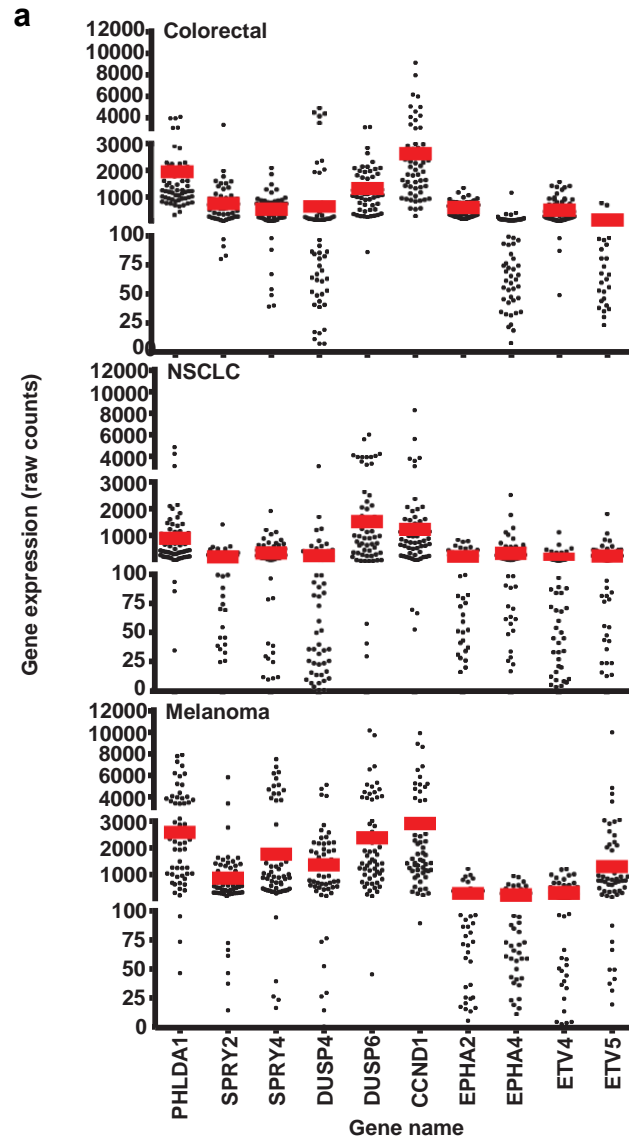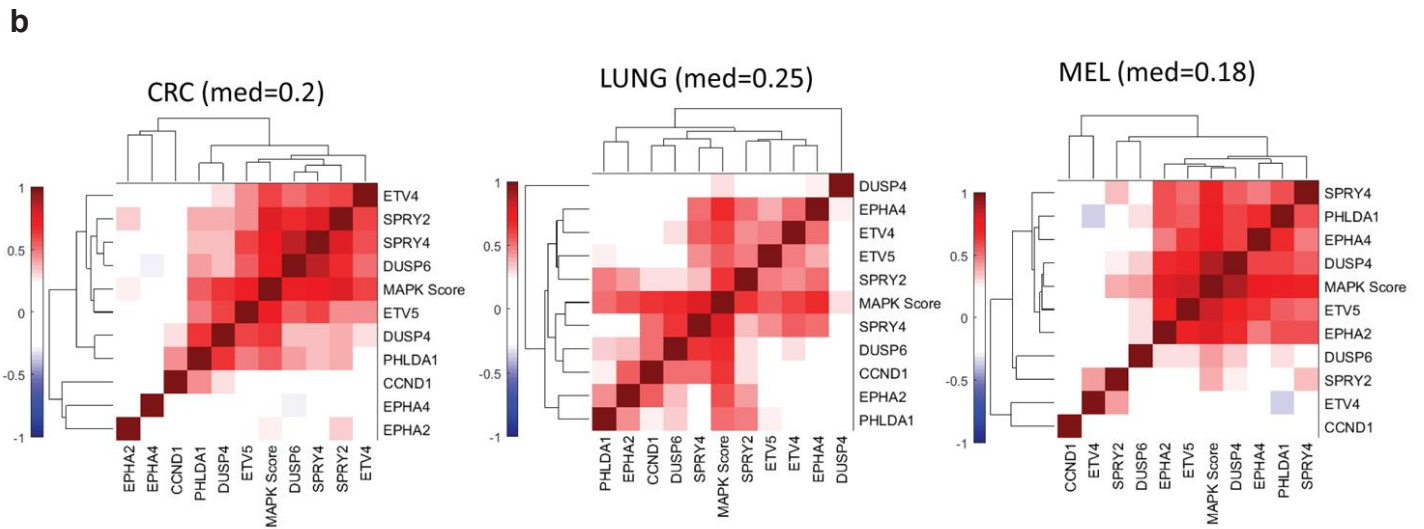

**Supplementary Figure 1: Expression and correlation of the 10 MAPK genes that constitute MPAS in colorectal, lung and pancreatic patient samples. (A)** Raw gene expression values of each gene are shown and red bars represent median values. Raw counts below 10 were considered below background (geometric mean of the negative controls). **(B)** Correlation matrices of the genes constituting MPAS across each tissue type.

## Supplementary Figure 2

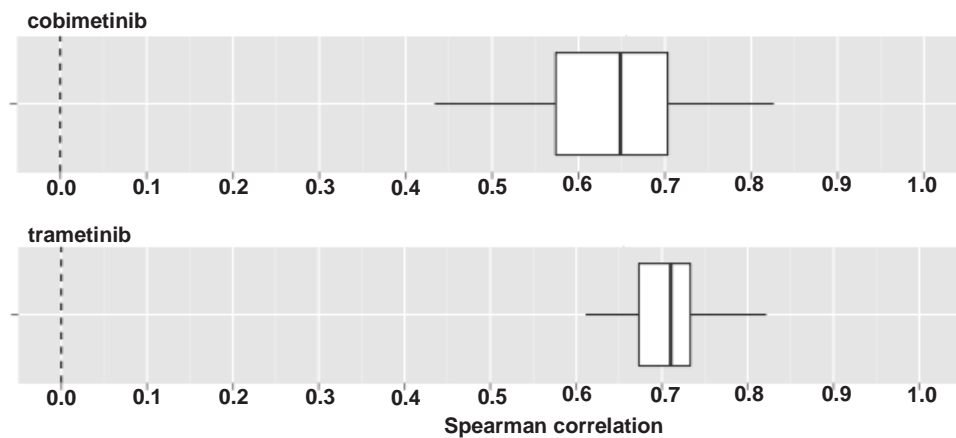

### Supplementary Figure 2: Cross-validation of the E-Net model

Predicted mean viabilities of the cell lines used to train the model were correlated with experimentally derived mean viabilities to both trametinib and cobimetinib treatment.

### Supplementary Figure 3

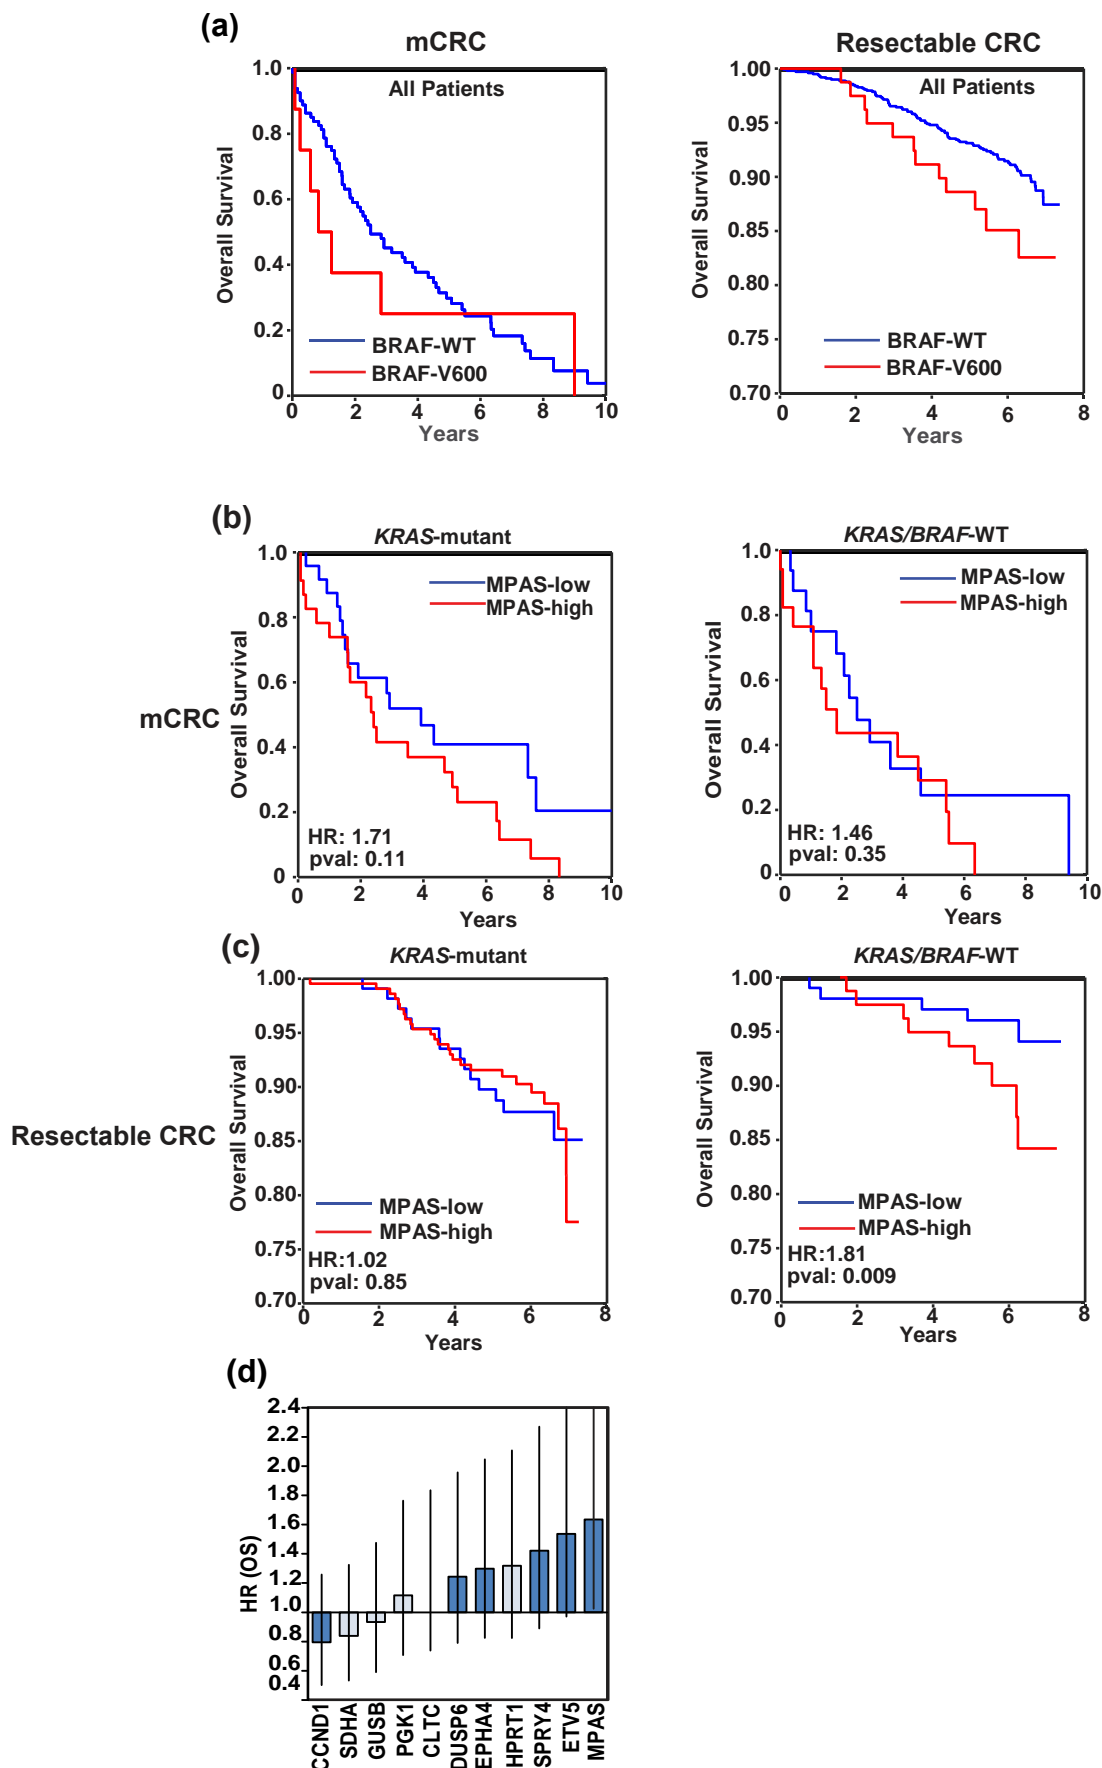

**Supplementary Figure 3: Association of BRAF-mutational status or MPAS with overall survival in patients with mCRC or resectable CRC**  
 Kaplan-Meier curves for overall survival were plotted according to (a) *BRAF*-mutational status in mCRC and resectable CRC; (b) MPAS high vs low in mCRC in *KRAS*-mutant patients and in *KRAS*/*BRAF*-wild-type patients; (c) MPAS high vs low in resectable CRC in *KRAS*-mutant patients and in *KRAS*/*BRAF*-wild-type patients. (d) Hazard ratios based on individual MAPK gene expression.

Supplementary Figure 4

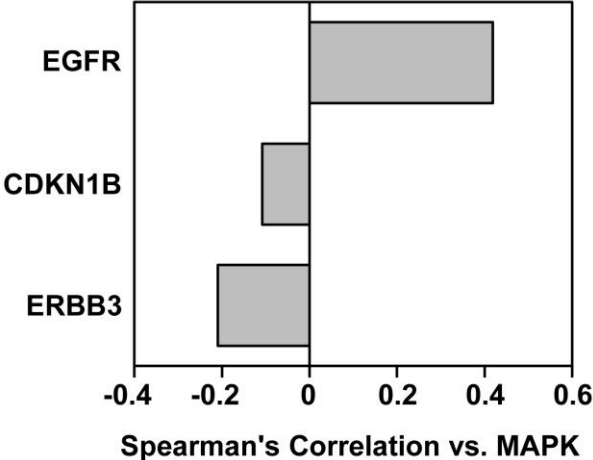

Supplementary Figure 4: Spearman's Rank Correlation coefficients between EGFR, CDKN1B, and ERBB3 gene expression, and MPAS for HER2+ breast cancer patients.

## Supplementary Table 1

| NCI-H2347                                     |           | cobimetinib mM |           |           |  |
|-----------------------------------------------|-----------|----------------|-----------|-----------|--|
| <b>MAPK genes included in MPAS</b>            |           |                |           |           |  |
| Gene name                                     | 0.01      | 0.1            | 0.3       | 1         |  |
| DUSP4                                         | 84.009818 | 35.643594      | 27.190967 | 19.840943 |  |
| DUSP6                                         | 47.248463 | 3.6312725      | 2.0102699 | 1.6448766 |  |
| SPRY2                                         | 97.973703 | 69.697768      | 57.526811 | 56.651999 |  |
| SPRY4                                         | 53.397032 | 11.117733      | 8.6011996 | 8.1301907 |  |
| ETV4                                          | 75.287801 | 63.019759      | 60.80756  | 52.484966 |  |
| ETV5                                          | 91.32767  | 50.136426      | 39.706065 | 38.61466  |  |
| EPHA2                                         | 63.371252 | 22.808825      | 16.801277 | 15.679199 |  |
| EPHA4                                         | 56.282802 | 26.257878      | 24.385499 | 27.378468 |  |
| CCND1                                         | 79.840366 | 55.029664      | 49.55298  | 48.757693 |  |
| PHLDA1                                        | 59.920227 | 16.641753      | 11.959699 | 10.954393 |  |
| <b>MAPK target genes not included in MPAS</b> |           |                |           |           |  |
| INPP5F                                        | 95.098361 | 91.2922        | 93.438092 | 92.598326 |  |
| MAP2K3                                        | 94.577957 | 79.448325      | 83.714139 | 74.641885 |  |
| TRIB2                                         | 63.343938 | 50.281607      | 36.361494 | 47.071992 |  |
| ETV1                                          | 86.091355 | 53.854333      | 55.643203 | 53.681912 |  |
| <b>HUP-T4</b>                                 |           |                |           |           |  |
|                                               |           | cobimetinib mM |           |           |  |
| <b>MAPK genes included in MPAS</b>            |           |                |           |           |  |
| Gene name                                     | 0.01      | 0.1            | 0.3       | 1         |  |
| DUSP4                                         | 76.336449 | 17.050127      | 11.564996 | 6.7969414 |  |
| DUSP6                                         | 49.301246 | 4.6825306      | 2.1822457 | 2.4345015 |  |
| SPRY2                                         | 69.159009 | 22.820941      | 18.803954 | 13.227513 |  |
| SPRY4                                         | 49.284206 | 16.32246       | 6.9701948 | 6.4538841 |  |
| ETV4                                          | 56.787565 | 25.751295      | 11.19171  | 5.1813472 |  |
| ETV5                                          | 59.962687 | 25.932836      | 20.149254 | 7.4626866 |  |
| EPHA2                                         | 73.96657  | 40.20447       | 33.604622 | 32.776262 |  |
| EPHA4                                         | 67.624009 | 41.396946      | 35.555819 | 35.27643  |  |
| CCND1                                         | 85.876056 | 51.258585      | 46.229946 | 46.347097 |  |
| PHLDA1                                        | 41.983977 | 6.9209501      | 4.8211525 | 4.7895848 |  |
| <b>MAPK target genes not included in MPAS</b> |           |                |           |           |  |
| INPP5F                                        | 98.385829 | 95.278025      | 83.795399 | 86.468214 |  |
| MAP2K3                                        | 58.541731 | 60.330432      | 27.371702 | 27.879488 |  |
| TRIB2                                         | 104.56906 | 100.09922      | 97.721914 | 96.892113 |  |
| ETV1                                          | 77.323287 | 28.507356      | 32.956584 | 28.7047   |  |
| <b>MEL-JUSO</b>                               |           |                |           |           |  |
|                                               |           | cobimetinib mM |           |           |  |
| <b>MAPK genes included in MPAS</b>            |           |                |           |           |  |
| Gene name                                     | 0.01      | 0.1            | 0.3       | 1         |  |
| DUSP4                                         | 93.430208 | 66.927549      | 40.285665 | 28.729698 |  |
| DUSP6                                         | 57.927467 | 22.318912      | 7.1517999 | 2.7265561 |  |
| SPRY2                                         | 100.74749 | 59.635738      | 27.617305 | 10.650026 |  |
| SPRY4                                         | 58.016714 | 12.803481      | 4.1164814 | 2.3020591 |  |
| ETV4                                          | 89.913793 | 55.901254      | 43.510972 | 65.23511  |  |
| ETV5                                          | 139.99269 | 77.657592      | 45.770144 | 40.931847 |  |
| EPHA2                                         | 64.568901 | 41.565031      | 26.457866 | 24.064136 |  |
| EPHA4                                         | 75.691057 | 64.444444      | 55.98916  | 55.691057 |  |
| CCND1                                         | 83.156671 | 47.593063      | 27.755948 | 22.979558 |  |
| PHLDA1                                        | 75.101762 | 59.373121      | 48.82742  | 40.521648 |  |
| <b>MAPK target genes not included in MPAS</b> |           |                |           |           |  |
| INPP5F                                        | 83.926748 | 58.14958       | 43.547277 | 39.593179 |  |
| MAP2K3                                        | 60.836602 | 56.536133      | 31.639033 | 32.63122  |  |
| TRIB2                                         | 120.78999 | 103.25927      | 68.948157 | 53.587973 |  |
| ETV1                                          | 110.8749  | 87.382614      | 65.637116 | 63.080469 |  |

Supplementary Table 1: MAPK gene expression in melanoma (MEL-JUSO), lung (NCI-H2347) and pancreatic (HUP-T4), % inhibition in response to 0.01-1uM cobimetinib treatment for 72 h.



Supplementary Table 2

| Cell line | Tissue | Individual MAPK gene expression (RPKM) |       |       |       |       |       |       |       |        |        | MPAS  | Mean viability to different drugs |         |                  |                  |         |                |
|-----------|--------|----------------------------------------|-------|-------|-------|-------|-------|-------|-------|--------|--------|-------|-----------------------------------|---------|------------------|------------------|---------|----------------|
|           |        | DUSP4                                  | DUSP6 | SPRY2 | SPRY4 | CCND1 | ETV4  | ETV5  | EPHA2 | EPHA4  | PHLDA1 |       | GDC0068                           | GDC0941 | Vemu-<br>rafenib | Cobi-<br>metinib | GDC0623 | PD032-<br>5901 |
| A172      | Brain  | 3.45                                   | 2.01  | 1.43  | 2.10  | 8.49  | 3.74  | 3.61  | 6.56  | 2.25   | 4.31   | -0.40 | 0.99                              | 0.9     | 0.87             | 0.8              | 0.86    | 0.75           |
| CHP-212   | Brain  | 0.06                                   | 1.36  | 6.89  | 3.51  | 8.54  | 6.61  | 4.29  | 4.63  | 0.67   | 5.42   | -0.45 | 0.87                              | 0.78    | 0.99             | 0.29             | 0.6     | 0.09           |
| G111      | Brain  | 5.24                                   | 4.79  | 4.18  | 3.61  | 6.68  | 4.39  | 4.44  | 4.92  | -0.57  | 6.83   | -0.43 | 0.84                              | 0.83    | 0.92             | 0.71             | 0.77    | 0.68           |
| G112      | Brain  | 0.26                                   | 1.15  | 2.82  | 1.00  | 1.08  | 3.23  | 3.89  | 4.03  | 1.09   | 3.29   | -0.98 | 0.8                               | 0.79    | 0.92             | 0.91             | 1.01    | 0.94           |
| G118      | Brain  | 3.69                                   | 3.58  | 2.82  | 2.41  | 5.84  | 2.93  | 3.87  | 6.75  | 2.53   | 5.05   | -0.45 | 0.8                               | 0.79    | 0.99             | 0.74             | 0.83    | 0.71           |
| G120      | Brain  | 4.52                                   | 3.32  | 4.26  | 3.32  | 7.14  | 2.81  | 4.51  | 6.52  | 2.44   | 5.84   | -0.29 | 0.86                              | 0.68    | 0.97             | 0.73             | 0.78    | 0.6            |
| G121      | Brain  | 2.68                                   | 3.22  | 3.44  | 3.23  | 7.62  | 3.13  | 3.66  | 7.38  | 0.48   | 5.42   | -0.59 | 0.88                              | 0.88    | 0.98             | 0.64             | 0.68    | 0.69           |
| G122      | Brain  | -0.41                                  | 0.70  | 2.36  | 0.80  | 3.22  | 2.85  | 4.48  | 4.76  | 0.47   | 2.99   | -1.00 | 0.82                              | 0.86    | 0.98             | 0.88             | 0.93    | 0.9            |
| G124      | Brain  | 0.71                                   | 2.95  | 5.78  | 2.86  | 6.76  | 2.21  | 3.34  | 5.56  | 2.51   | 4.76   | -0.72 | 0.87                              | 0.77    | 0.96             | 0.82             | 0.85    | 0.68           |
| G130      | Brain  | 2.22                                   | 2.42  | 3.72  | 2.70  | 3.36  | 1.56  | 3.29  | 5.50  | 2.02   | 5.20   | -0.81 | 0.88                              | 0.9     | 0.99             | 0.92             | 0.96    | 0.9            |
| G140      | Brain  | 1.79                                   | 2.49  | 2.19  | 0.88  | 7.35  | 3.94  | 3.35  | 4.17  | 1.52   | 5.01   | -0.48 | 0.78                              | 0.87    | 0.94             | 0.7              | 0.81    | 0.72           |
| G141      | Brain  | 1.69                                   | 3.19  | 2.35  | 1.30  | 5.42  | 2.41  | 3.92  | 6.66  | 1.41   | 4.61   | -0.54 | 0.82                              | 0.82    | 0.97             | 0.71             | 0.74    | 0.64           |
| G142      | Brain  | 3.32                                   | 2.25  | 2.58  | 1.13  | 4.11  | 2.78  | 2.49  | 5.99  | 0.54   | 3.91   | -0.58 | 0.85                              | 0.81    | 0.94             | 0.72             | 0.82    | 0.72           |
| G22       | Brain  | 5.11                                   | 4.03  | 3.92  | 1.93  | 6.56  | 3.72  | 4.29  | 3.82  | -2.82  | 6.60   | -0.52 | 0.81                              | 0.96    | 0.95             | 0.82             | 0.87    | 0.82           |
| G28T      | Brain  | 2.83                                   | 2.87  | 3.92  | 3.24  | 7.02  | 3.09  | 3.99  | 7.25  | 1.53   | 6.02   | -0.32 | 0.87                              | 0.97    | 1.02             | 0.94             | 0.93    | 0.87           |
| G44       | Brain  | 3.81                                   | 2.84  | 3.94  | 1.34  | 8.37  | 1.79  | 4.53  | 4.29  | -1.78  | 7.06   | -0.50 | 0.81                              | 0.72    | 0.9              | 0.76             | 0.84    | 0.62           |
| G59       | Brain  | -0.24                                  | -0.01 | 2.98  | 0.65  | 6.76  | 1.82  | 3.22  | 4.78  | 1.04   | 6.70   | -0.68 | 0.78                              | 0.86    | 0.96             | 0.8              | 0.9     | 0.79           |
| G61       | Brain  | 2.25                                   | 4.33  | 2.70  | 1.35  | 7.14  | 3.27  | 3.15  | 4.78  | -1.33  | 4.36   | -0.54 | 0.88                              | 0.82    | 0.89             | 0.78             | 0.88    | 0.71           |
| G84       | Brain  | -0.39                                  | 1.53  | 2.29  | -1.25 | 7.37  | 3.53  | 1.90  | 7.08  | -3.22  | 3.51   | -0.92 | 0.7                               | 0.9     | 0.97             | 0.68             | 0.75    | 0.62           |
| G96       | Brain  | 3.21                                   | 2.98  | 4.39  | 0.69  | 8.22  | 1.53  | 4.62  | 2.03  | -1.40  | 7.48   | -0.48 | 0.86                              | 0.76    | 0.92             | 0.71             | 0.86    | 0.69           |
| Hs 683    | Brain  | 3.67                                   | 3.98  | 4.47  | 4.39  | 8.39  | 3.35  | 4.83  | 7.20  | 1.67   | 6.86   | -0.26 | 0.83                              | 0.83    | 0.95             | 0.81             | 0.88    | 0.81           |
| IMR-32    | Brain  | 1.75                                   | 0.03  | 0.51  | -0.06 | 7.86  | -0.52 | 1.06  | 0.14  | -3.66  | 2.87   | -1.03 | 0.98                              | 0.94    | 0.98             | 0.83             | 0.87    | 0.87           |
| KELLY     | Brain  | 1.72                                   | 1.65  | 3.83  | -1.08 | 6.68  | -0.71 | 3.40  | 1.74  | -2.32  | 1.57   | -0.91 | 0.93                              | 0.85    | 0.89             | 0.68             | 0.75    | 0.66           |
| LN-18     | Brain  | 4.44                                   | 3.35  | 2.72  | 2.96  | 6.58  | 3.32  | 3.73  | 6.87  | -1.01  | 6.17   | -0.58 | 1.04                              | 0.94    | 0.98             | 0.85             | 0.9     | 0.88           |
| LN-229    | Brain  | 4.85                                   | 5.00  | 5.56  | 3.78  | 7.97  | 3.72  | 4.37  | 6.25  | 2.43   | 6.02   | -0.31 | 0.97                              | 0.92    | 0.88             | 0.69             | 0.78    | 0.69           |
| SF268     | Brain  | 4.22                                   | 2.61  | 1.72  | 1.87  | 7.82  | 3.92  | 3.51  | 6.70  | 1.96   | 3.13   | -0.55 | 0.88                              | 0.87    | 0.98             | 0.82             | 1.03    | 0.9            |
| SF539     | Brain  | -1.31                                  | -0.39 | 2.14  | -0.38 | 5.39  | 1.43  | 3.42  | 6.34  | -0.46  | 3.07   | -0.77 | 0.75                              | 0.83    | 1.05             | 0.68             | 0.75    | 0.6            |
| SK-N-AS   | Brain  | 3.55                                   | 5.91  | 6.80  | 5.44  | 7.21  | 6.05  | 4.02  | 6.08  | -0.17  | 6.83   | -0.13 | 0.9                               | 0.85    | 1.03             | 0.51             | 0.67    | 0.32           |
| SK-N-DZ   | Brain  | -2.05                                  | -3.01 | 3.02  | -5.02 | 7.65  | -1.95 | -2.84 | -4.82 | -8.17  | 1.85   | -1.58 | 0.94                              | 0.82    | 1.02             | 0.56             | NaN     | 0.45           |
| SK-N-FI   | Brain  | 7.60                                   | 5.90  | 5.47  | 5.05  | 7.90  | 4.97  | 5.53  | -1.31 | -5.12  | 4.84   | -0.27 | 0.89                              | 0.84    | 0.98             | 0.74             | 0.8     | 0.64           |
| SK-N-SH   | Brain  | 4.02                                   | 4.27  | 4.40  | 4.15  | 7.81  | 4.76  | 4.19  | 4.67  | -5.03  | 4.01   | -0.49 | 0.88                              | 0.78    | 0.92             | 0.77             | 0.8     | 0.76           |
| T98G      | Brain  | 3.08                                   | 0.38  | 1.37  | -0.14 | 7.21  | 1.75  | 3.14  | 6.85  | 4.03   | 6.12   | -0.54 | 0.82                              | 0.7     | 0.91             | 0.74             | 0.81    | 0.73           |
| BT-20     | Breast | 3.67                                   | -0.79 | 2.65  | 0.26  | 6.09  | 3.03  | 4.48  | 3.91  | -0.89  | 4.06   | -0.80 | 0.68                              | 0.89    | 0.98             | 0.88             | 0.88    | 0.75           |
| BT-474    | Breast | 6.39                                   | 3.89  | 0.49  | 1.63  | 6.48  | 1.51  | 0.92  | 1.71  | 0.53   | -0.18  | -0.62 | 0.78                              | 0.81    | 1.02             | 0.98             | 1       | 0.96           |
| BT-549    | Breast | 4.27                                   | 4.30  | 4.15  | 2.39  | 3.90  | 2.60  | 4.48  | 6.28  | 3.19   | 6.11   | -0.43 | 0.76                              | 0.91    | 0.98             | 0.9              | 0.95    | 0.9            |
| CAL-120   | Breast | 0.51                                   | 1.76  | 5.27  | 1.33  | 7.38  | 2.43  | 3.61  | 4.65  | 2.74   | 5.23   | -0.64 | 0.87                              | 0.78    | 0.96             | 0.82             | 0.82    | 0.72           |
| CAL-148   | Breast | 2.02                                   | -0.34 | 2.51  | -0.58 | -3.17 | -1.11 | -7.83 | -2.13 | -4.46  | -0.82  | -1.61 | 0.42                              | 0.94    | 1.09             | 0.94             | 0.99    | 0.92           |
| CAL51     | Breast | 1.36                                   | 5.75  | 5.85  | 4.46  | 8.08  | 5.16  | 4.40  | 4.91  | -7.23  | 5.04   | -0.50 | 0.67                              | 0.79    | 0.97             | 0.82             | 0.77    | 0.66           |
| CAMA-1    | Breast | -2.51                                  | -0.75 | -4.02 | 3.20  | 8.01  | -2.32 | -3.91 | 2.45  | -10.25 | -2.28  | -1.82 | 0.68                              | 0.88    | 0.99             | 0.96             | 0.97    | 0.91           |
| EFM-19    | Breast | 0.23                                   | 1.33  | -3.13 | 0.37  | 7.82  | -1.89 | -5.83 | 3.56  | -10.25 | 1.18   | -1.70 | 0.68                              | 0.66    | 1                | 1.01             | 1.02    | 0.95           |
| EVSA-T    | Breast | 2.98                                   | -0.04 | -1.77 | -0.09 | 3.69  | -0.92 | -7.83 | -0.24 | -3.76  | -3.88  | -1.60 | 0.59                              | 0.73    | 0.94             | 0.92             | 0.96    | 0.95           |
| HCC1143   | Breast | 0.74                                   | 0.43  | 2.02  | 0.42  | 9.07  | 2.20  | 0.58  | 5.19  | 1.43   | 4.18   | -0.79 | 0.83                              | 0.89    | 0.96             | 0.8              | 0.8     | 0.6            |
| HCC1187   | Breast | -0.61                                  | -2.48 | 0.89  | -0.69 | 6.45  | 0.38  | -0.41 | 0.99  | -0.71  | 1.53   | -1.18 | 0.75                              | 0.89    | 1.01             | 0.92             | 0.94    | 0.89           |
| HCC1419   | Breast | 7.61                                   | 4.52  | 1.19  | 3.38  | 7.43  | 1.23  | 2.80  | 0.90  | -3.46  | -0.92  | -0.67 | 0.94                              | 0.93    | 1                | 1.01             | 1       | 0.99           |

|            |             |       |       |       |       |      |       |       |      |        |       |       |      |      |      |      |      |      |
|------------|-------------|-------|-------|-------|-------|------|-------|-------|------|--------|-------|-------|------|------|------|------|------|------|
| HCC1806    | Breast      | 3.16  | 5.29  | 2.21  | 2.31  | 6.60 | 3.54  | 2.68  | 6.03 | -1.27  | 6.38  | -0.46 | 0.85 | 0.96 | 0.99 | 0.68 | 0.79 | 0.51 |
| HCC1937    | Breast      | 2.91  | 4.01  | 4.17  | 2.26  | 7.97 | 3.77  | 4.97  | 6.42 | 1.41   | 5.94  | -0.33 | 0.84 | 0.83 | 0.99 | 0.9  | 0.9  | 0.8  |
| HCC1954    | Breast      | 4.41  | 5.11  | 4.26  | 2.62  | 9.75 | 4.37  | 4.38  | 5.60 | 1.11   | 4.05  | -0.39 | 0.68 | 0.9  | 1.04 | 0.77 | 0.75 | 0.63 |
| HCC38      | Breast      | 2.89  | 1.79  | 3.56  | 1.97  | 7.69 | 3.04  | 4.79  | 6.23 | 0.59   | 5.33  | -0.68 | 0.88 | 0.93 | 0.99 | 0.96 | 0.97 | 0.92 |
| Hs 578T    | Breast      | -1.57 | 1.85  | 2.58  | 1.45  | 6.49 | 1.79  | 4.36  | 4.63 | 2.00   | 4.13  | -0.46 | 0.78 | 0.89 | 0.95 | 0.92 | 0.96 | 0.89 |
| JIMT-1     | Breast      | 2.43  | 2.06  | 0.36  | 1.08  | 7.28 | 5.17  | 3.90  | 4.29 | 3.22   | 4.62  | -0.38 | 0.83 | 0.81 | 0.94 | 0.85 | 0.91 | 0.76 |
| KPL-1      | Breast      | 6.05  | 1.92  | 0.40  | 2.23  | 7.32 | 2.86  | 3.20  | 3.31 | 1.56   | 2.26  | -0.70 | 0.8  | 0.69 | 1.01 | 1.01 | 1.1  | 1.04 |
| MCF 10A    | Breast      | 5.16  | 4.05  | 3.89  | 3.15  | 5.77 | 3.61  | 3.45  | 6.03 | -1.86  | 3.99  | -0.40 | 0.88 | 0.83 | 1.01 | 0.7  | 0.71 | 0.51 |
| MCF-7      | Breast      | 1.35  | -2.46 | -1.81 | -6.38 | 6.53 | -1.19 | -3.98 | 2.97 | 4.90   | 2.24  | -1.52 | 0.73 | 0.63 | 0.98 | 0.92 | 0.93 | 0.85 |
| MDA-MB-157 | Breast      | 1.72  | 0.74  | 1.87  | 0.83  | 5.82 | 0.90  | 2.31  | 5.90 | 1.62   | 3.63  | -0.94 | 0.92 | 0.88 | 0.92 | 0.84 | 0.91 | 0.8  |
| MDA-MB-175 | Breast      | 7.57  | 6.63  | 1.38  | 6.05  | 8.11 | 5.59  | 2.96  | 2.81 | 1.17   | 5.35  | -0.29 | 0.79 | 0.95 | 1.01 | 0.75 | 0.75 | 0.67 |
| MDA-MB-231 | Breast      | 6.07  | 6.44  | 5.49  | 5.44  | 7.85 | 4.71  | 4.07  | 6.74 | 0.82   | 7.04  | -0.21 | 0.97 | 0.92 | 0.93 | 0.69 | 0.74 | 0.56 |
| MDA-MB-436 | Breast      | 4.44  | 0.37  | 4.26  | 4.18  | 6.20 | 4.48  | 4.04  | 5.48 | 1.07   | 6.89  | -0.70 | 0.85 | 0.88 | 1    | 0.89 | 0.94 | 0.81 |
| MDA-MB-453 | Breast      | 3.92  | 5.69  | 0.86  | 3.52  | 7.06 | 0.11  | 1.10  | 2.15 | 1.96   | -1.98 | -0.91 | 0.73 | 0.83 | 0.98 | 0.95 | 0.99 | 0.9  |
| MDA-MB-468 | Breast      | 3.04  | 1.99  | 3.81  | 1.73  | 6.31 | 3.10  | 2.45  | 3.64 | 1.66   | 3.31  | -0.64 | 0.74 | 0.87 | 0.93 | 0.74 | 0.8  | 0.68 |
| MFM-223    | Breast      | 4.03  | 5.20  | 1.57  | 2.14  | 7.79 | 4.41  | 3.81  | 2.37 | -1.41  | 0.97  | -0.45 | 0.68 | 0.95 | 1.01 | 0.86 | 0.96 | 0.73 |
| MT-3       | Breast      | 2.23  | 2.39  | 3.93  | 1.68  | 6.72 | 5.17  | 3.35  | 4.82 | -0.84  | 6.29  | -0.75 | 0.74 | 0.79 | 1.02 | 0.71 | 0.73 | 0.5  |
| MX-1       | Breast      | 1.65  | 2.20  | 3.01  | -2.31 | 1.65 | 3.81  | 2.94  | 2.86 | 1.04   | -0.80 | -0.78 | 0.85 | 0.87 | 0.99 | 0.94 | 0.94 | 0.81 |
| SK-BR-3    | Breast      | 4.45  | 0.18  | 1.28  | 1.99  | 6.80 | 2.03  | -5.37 | 3.68 | -0.04  | 0.98  | -1.43 | 0.76 | 0.77 | 1.02 | 0.97 | 1.04 | 0.96 |
| SUM 149PT  | Breast      | 3.94  | 3.41  | 3.14  | 2.08  | 5.62 | 5.32  | 3.86  | 6.08 | -3.75  | 4.49  | -0.61 | 0.73 | 0.83 | 0.98 | 0.74 | 0.7  | 0.57 |
| SW 527     | Breast      | 4.25  | 6.56  | 5.06  | 6.14  | 7.68 | 6.59  | 5.20  | 5.91 | 3.19   | 5.67  | -0.24 | 0.85 | 0.82 | 0.91 | 0.77 | 0.74 | 0.61 |
| SW 982     | Breast      | 3.61  | 5.14  | 3.83  | 3.63  | 7.73 | 4.22  | 4.47  | 6.35 | 1.77   | 6.45  | -0.20 | 0.92 | 0.84 | 0.87 | 0.73 | 0.88 | 0.75 |
| T-47D      | Breast      | 3.49  | 1.71  | 1.15  | -1.02 | 6.43 | 0.83  | -1.28 | 0.24 | 1.34   | 3.63  | -1.07 | 0.77 | 0.74 | 0.97 | 0.94 | 0.95 | 0.87 |
| YMB-1-E    | Breast      | 5.22  | -1.66 | -0.78 | -1.83 | 7.45 | -1.28 | -5.12 | 1.36 | -2.73  | -3.92 | -1.19 | 0.61 | 0.89 | 1.02 | 0.95 | 0.99 | 0.9  |
| C-33 A     | Cervix      | -3.35 | 2.77  | -1.05 | 2.96  | 5.60 | 4.49  | 4.05  | 2.91 | -5.03  | 0.27  | -1.09 | 0.65 | 0.92 | 0.98 | 0.7  | 0.76 | 0.57 |
| Ca Ski     | Cervix      | 4.20  | 1.80  | 1.50  | -1.88 | 7.46 | 2.23  | 0.73  | 6.06 | 2.51   | 4.48  | -0.73 | 0.77 | 0.86 | 0.98 | 0.8  | 0.85 | 0.73 |
| HeLa       | Cervix      | 1.99  | -1.15 | 1.22  | -3.78 | 5.85 | 4.35  | 0.32  | 5.69 | -1.28  | 1.08  | -1.02 | 0.95 | 0.86 | 0.99 | 0.9  | 0.91 | 0.77 |
| HEp-2      | Cervix      | -0.73 | -0.86 | 1.58  | -4.11 | 5.50 | 0.63  | 1.08  | 5.31 | -7.27  | 1.08  | -1.26 | 0.91 | 0.87 | 1    | 0.86 | 0.89 | 0.82 |
| ME-180     | Cervix      | 3.35  | 5.26  | 0.28  | 0.17  | 7.17 | 3.48  | 0.83  | 6.36 | 0.84   | 5.75  | -0.67 | 0.47 | 0.69 | 0.98 | 0.72 | 0.76 | 0.58 |
| MS751      | Cervix      | 3.55  | -1.67 | 0.45  | -4.11 | 5.49 | -0.02 | -1.58 | 5.90 | -8.03  | 3.27  | -1.49 | 0.95 | 0.9  | 0.95 | 0.87 | 0.92 | 0.81 |
| SiHa       | Cervix      | 3.51  | 0.99  | 2.99  | 1.52  | 4.62 | 3.44  | 4.24  | 6.96 | 0.81   | 4.36  | -0.63 | 0.87 | 0.9  | 0.96 | 0.87 | 0.89 | 0.83 |
| ATRFLOX    | Colo-Rectal | 4.83  | 6.02  | 1.90  | 4.94  | 7.35 | 4.95  | 5.29  | 6.01 | -2.04  | 7.12  | -0.24 | 0.84 | 0.83 | 0.93 | 0.51 | 0.53 | 0.27 |
| C170       | Colo-Rectal | 2.12  | 5.40  | 3.57  | 2.05  | 7.36 | 4.71  | 3.47  | 6.37 | -10.25 | 6.36  | -0.75 | 0.89 | 0.77 | 0.97 | 0.62 | 0.67 | 0.41 |
| C2BBe1     | Colo-Rectal | 0.25  | 3.60  | 4.04  | 2.62  | 7.06 | 4.88  | 1.97  | 5.51 | 3.28   | 4.11  | -0.55 | 0.91 | 0.91 | 0.97 | 0.87 | 0.87 | 0.76 |
| Caco-2     | Colo-Rectal | 0.62  | 4.63  | 4.68  | 3.25  | 6.92 | 5.74  | 1.31  | 5.15 | 2.33   | 4.15  | -0.71 | 0.91 | 0.88 | 0.98 | 0.77 | 0.82 | 0.7  |
| CaR-1      | Colo-Rectal | 3.78  | 3.17  | 3.94  | 0.79  | 8.38 | 4.22  | 1.89  | 6.41 | -1.16  | 5.68  | -0.62 | 0.83 | 0.77 | 0.96 | 0.74 | 0.8  | 0.57 |
| CL-11      | Colo-Rectal | 0.86  | 6.23  | 5.74  | 4.03  | 7.18 | 4.39  | 4.93  | 6.10 | 0.30   | 7.82  | -0.46 | 0.93 | 0.82 | 1.04 | 0.53 | 0.68 | 0.34 |
| CL-34      | Colo-Rectal | 1.31  | 5.71  | 4.71  | 2.09  | 5.38 | 4.19  | 2.71  | 4.04 | -1.78  | 5.80  | -0.67 | 0.94 | 0.98 | 0.92 | 0.62 | 0.73 | 0.45 |
| CoCM-1     | Colo-Rectal | -0.14 | 5.42  | 4.42  | 2.48  | 5.76 | 4.92  | 0.40  | 5.21 | -1.54  | 4.31  | -1.12 | 0.98 | 0.81 | 1    | 0.7  | 0.77 | 0.62 |
| COLO 201   | Colo-Rectal | 4.76  | 5.78  | 4.03  | 3.68  | 5.36 | 4.51  | 3.67  | 4.43 | 3.14   | 7.31  | -0.36 | 0.92 | 0.94 | 0.67 | 0.28 | 0.54 | 0.15 |
| COLO 205   | Colo-Rectal | 3.84  | 5.76  | 4.88  | 4.01  | 4.03 | 4.34  | 3.45  | 2.40 | 1.99   | 6.23  | -0.58 | 0.79 | 0.87 | 0.69 | 0.36 | 0.66 | 0.24 |
| COLO 206F  | Colo-Rectal | 4.31  | 6.10  | 4.27  | 3.99  | 4.61 | 4.40  | 3.27  | 4.12 | 1.49   | 6.73  | -0.47 | 0.84 | 0.86 | 0.69 | 0.29 | 0.57 | 0.16 |
| COLO       |             |       |       |       |       |      |       |       |      |        |       |       |      |      |      |      |      |      |
| 320DM      | Colo-Rectal | -7.54 | -0.39 | -2.05 | -5.76 | 3.11 | 2.10  | 3.85  | 3.57 | 2.64   | 0.29  | -1.05 | 0.95 | 0.92 | 0.98 | 0.93 | 1.05 | 0.98 |

|           |             |       |       |       |       |      |      |       |      |        |       |       |      |      |      |      |      |      |
|-----------|-------------|-------|-------|-------|-------|------|------|-------|------|--------|-------|-------|------|------|------|------|------|------|
| COLO      |             |       |       |       |       |      |      |       |      |        |       |       |      |      |      |      |      |      |
| 320HSR    | Colo-Rectal | -6.55 | 1.59  | 3.50  | -3.37 | 5.17 | 3.33 | 3.49  | 3.16 | 1.61   | -0.41 | -1.09 | 0.96 | 0.84 | 0.99 | 0.96 | 1.04 | 0.98 |
| COLO 678  | Colo-Rectal | 2.59  | 5.46  | 2.49  | 1.62  | 8.24 | 5.77 | 3.66  | 7.38 | -2.63  | 5.53  | -0.66 | 0.91 | 0.93 | 1.01 | 0.73 | 0.76 | 0.59 |
| COLO 741  | Colo-Rectal | 6.24  | 4.98  | 6.10  | 3.16  | 6.33 | 5.05 | 5.97  | 3.35 | 2.14   | 7.24  | -0.43 | 0.94 | 0.91 | 0.86 | 0.67 | 0.74 | 0.52 |
| CW-2      | Colo-Rectal | -3.28 | 4.23  | 4.70  | 2.85  | 5.58 | 4.70 | 5.00  | 4.08 | -5.05  | 3.56  | -1.04 | 0.99 | 0.87 | 1.01 | 0.84 | 0.85 | 0.66 |
| CX-1      | Colo-Rectal | 2.17  | 6.41  | 3.99  | 4.23  | 5.18 | 5.98 | 4.28  | 6.83 | -4.39  | 5.93  | -0.73 | 0.91 | 0.82 | 0.85 | 0.51 | 0.61 | 0.45 |
| DLD-1     | Colo-Rectal | 0.03  | 6.29  | 3.45  | 2.10  | 7.73 | 4.29 | 3.12  | 5.20 | -0.46  | 5.47  | -0.67 | 0.95 | 0.89 | 0.94 | 0.75 | 0.78 | 0.65 |
| GP2d      | Colo-Rectal | 1.69  | 4.42  | 3.42  | 4.76  | 6.24 | 5.83 | 4.34  | 3.97 | -8.25  | 2.97  | -0.74 | 0.7  | 0.69 | 1.02 | 0.73 | 0.82 | 0.62 |
| GP5d      | Colo-Rectal | 2.36  | 3.91  | 3.04  | 3.52  | 6.41 | 5.61 | 4.19  | 5.33 | -10.25 | 4.22  | -0.83 | 0.79 | 0.74 | 1.06 | 0.79 | 0.93 | 0.72 |
| HCA-7     | Colo-Rectal | 2.26  | 5.79  | 2.68  | 2.05  | 8.01 | 4.87 | 3.70  | 6.16 | -1.26  | 4.89  | -0.62 | 0.87 | 0.8  | 1.01 | 0.69 | 0.65 | 0.47 |
| HCC1263   | Colo-Rectal | 0.94  | 3.58  | 3.76  | 2.74  | 5.74 | 5.09 | -1.68 | 4.54 | -3.60  | 3.78  | -0.87 | 0.86 | 1.03 | 0.98 | 0.75 | 0.78 | 0.63 |
| HCT 116   | Colo-Rectal | 5.10  | 7.16  | 2.10  | 4.48  | 7.26 | 4.57 | 5.57  | 5.77 | -0.04  | 7.10  | -0.21 | 0.92 | 0.89 | 0.96 | 0.89 | 0.77 | 0.7  |
| HCT-15    | Colo-Rectal | -1.29 | 3.67  | 3.00  | 1.96  | 6.86 | 4.25 | 4.58  | 5.57 | -5.89  | 6.13  | -0.95 | 0.91 | 0.86 | 0.96 | 0.8  | 0.81 | 0.64 |
| HCT-8     | Colo-Rectal | 0.09  | 5.88  | 4.27  | 2.58  | 7.15 | 4.04 | 4.14  | 5.02 | -5.07  | 3.58  | -0.81 | 0.87 | 0.81 | 0.91 | 0.64 | 0.71 | 0.5  |
| HM7       | Colo-Rectal | 3.70  | 6.39  | 4.52  | 2.57  | 6.86 | 6.98 | 5.64  | 7.06 | 1.52   | 6.39  | -0.27 | 0.7  | 0.81 | 1.02 | 0.59 | 0.73 | 0.38 |
| HT-115    | Colo-Rectal | 3.33  | 5.99  | 3.80  | 3.09  | 6.79 | 5.73 | 2.81  | 6.19 | -5.47  | 6.03  | -0.63 | 0.89 | 0.81 | 1.05 | 0.68 | 0.71 | 0.48 |
| HT-29     | Colo-Rectal | 1.69  | 5.04  | 4.89  | 3.40  | 5.45 | 5.69 | 4.36  | 5.39 | -3.21  | 3.99  | -0.58 | 0.86 | 0.79 | 0.75 | 0.37 | 0.66 | 0.31 |
| HT-55     | Colo-Rectal | -1.39 | 4.77  | 4.64  | 4.01  | 7.01 | 6.19 | -0.11 | 5.36 | 1.62   | 5.88  | -0.54 | 0.83 | 0.75 | 0.95 | 0.64 | 0.77 | 0.49 |
| KM-12     | Colo-Rectal | 5.76  | 6.11  | 5.37  | 3.24  | 5.83 | 5.02 | 4.66  | 5.41 | 1.00   | 6.24  | -0.20 | 0.93 | 0.99 | 0.97 | 0.86 | 0.88 | 0.79 |
| LoVo      | Colo-Rectal | 4.07  | 4.45  | 4.57  | 2.64  | 6.66 | 4.77 | 3.38  | 6.23 | -0.23  | 5.30  | -0.53 | 0.77 | 0.79 | 0.98 | 0.61 | 0.72 | 0.44 |
| LS1034    | Colo-Rectal | -1.20 | 4.18  | 4.70  | 3.80  | 6.43 | 6.30 | -0.28 | 4.69 | -1.49  | 6.50  | -0.61 | 0.94 | 0.95 | 1.02 | 0.67 | 0.7  | 0.39 |
| MDST8     | Colo-Rectal | 4.49  | 4.47  | 5.73  | 2.19  | 8.73 | 4.13 | 4.70  | 5.00 | 2.62   | 7.94  | -0.47 | 0.79 | 0.9  | 0.91 | 0.72 | 0.7  | 0.43 |
| NCI-H716  | Colo-Rectal | 3.84  | 5.53  | 4.84  | 5.06  | 7.05 | 5.42 | 5.26  | 2.50 | 4.69   | 2.01  | -0.50 | 0.88 | 0.84 | 1    | 0.7  | 0.67 | 0.46 |
| OUMS-23   | Colo-Rectal | 2.46  | 5.42  | 4.37  | 5.09  | 7.77 | 5.77 | 3.35  | 5.41 | 2.47   | 4.00  | -0.05 | 0.83 | 0.92 | 0.92 | 0.83 | 0.86 | 0.87 |
| RCM-1     | Colo-Rectal | 2.37  | 6.55  | 3.92  | 4.27  | 6.64 | 6.15 | 4.52  | 5.61 | -7.31  | 6.30  | -0.45 | 0.99 | 0.91 | 1.03 | 0.73 | 0.75 | 0.49 |
| RKO       | Colo-Rectal | -2.75 | 5.52  | 3.42  | 6.66  | 5.51 | 4.89 | 4.51  | 6.12 | -7.08  | 6.43  | -0.65 | 0.79 | 0.89 | 0.85 | 0.48 | 0.66 | 0.36 |
| RKO-E6    | Colo-Rectal | -0.39 | 4.47  | 3.39  | 6.42  | 5.84 | 4.99 | 4.53  | 6.66 | -8.04  | 6.42  | -0.70 | 0.75 | 0.87 | 0.86 | 0.57 | 0.73 | 0.41 |
| RPMI 2650 | Colo-Rectal | 0.55  | -1.68 | -3.68 | 0.51  | 7.95 | 3.88 | 2.07  | 5.36 | -4.32  | 0.86  | -0.91 | 0.81 | 0.77 | 1.01 | 0.99 | 1.06 | 0.92 |
| SK-CO-1   | Colo-Rectal | 6.29  | 5.46  | 4.65  | 3.25  | 6.95 | 4.98 | 2.31  | 7.42 | -10.25 | 6.52  | -0.78 | 0.92 | 0.81 | 0.95 | 0.49 | 0.61 | 0.26 |
| SNU-C1    | Colo-Rectal | 0.36  | 4.62  | 4.62  | 2.31  | 5.58 | 4.91 | 0.05  | 4.82 | -2.08  | 3.74  | -0.78 | 0.75 | 0.92 | 1.02 | 0.73 | 0.81 | 0.5  |
| SW 1463   | Colo-Rectal | -0.04 | 6.22  | 5.79  | 3.81  | 4.11 | 6.76 | 3.34  | 5.26 | -2.96  | 4.60  | -0.39 | 1.03 | 1    | 1.03 | 0.63 | 0.69 | 0.59 |
| SW 403    | Colo-Rectal | -2.54 | 4.32  | 4.43  | 3.36  | 5.09 | 4.98 | 1.77  | 3.84 | -10.25 | 3.63  | -1.32 | 0.82 | 0.86 | 1.06 | 0.68 | 0.73 | 0.42 |
| SW 48     | Colo-Rectal | 5.37  | 6.13  | 4.68  | 4.31  | 7.02 | 5.19 | 4.10  | 6.05 | 0.81   | 6.65  | -0.46 | 0.79 | 0.72 | 1.05 | 0.62 | 0.66 | 0.31 |
| SW 480    | Colo-Rectal | 1.74  | 7.38  | 3.08  | 4.12  | 9.58 | 6.29 | 5.85  | 5.30 | 3.08   | 4.44  | -0.33 | 0.92 | 0.91 | 1.08 | 0.63 | 0.67 | 0.41 |
| SW 620    | Colo-Rectal | 3.85  | 5.95  | 5.60  | 2.58  | 6.43 | 5.55 | 5.82  | 5.70 | 2.56   | 7.07  | -0.40 | 0.96 | 0.9  | 1.09 | 0.63 | 0.68 | 0.36 |
| SW 837    | Colo-Rectal | 0.92  | 3.52  | 1.04  | 3.62  | 7.23 | 5.36 | 3.13  | 6.97 | -1.86  | 4.52  | -0.63 | 0.91 | 0.87 | 1.03 | 0.7  | 0.72 | 0.43 |
| SW 948    | Colo-Rectal | 2.63  | 5.76  | 4.83  | 2.39  | 5.35 | 4.60 | 3.33  | 4.63 | -4.93  | 6.69  | -0.53 | 0.79 | 0.81 | 0.98 | 0.65 | 0.73 | 0.5  |
| T84       | Colo-Rectal | 0.00  | 7.17  | 3.51  | 3.69  | 5.33 | 6.35 | 3.17  | 5.22 | -6.76  | 6.60  | -0.68 | 0.95 | 0.99 | 0.98 | 0.75 | 0.7  | 0.59 |
| WiDr      | Colo-Rectal | 3.54  | 4.76  | 3.61  | 4.14  | 5.47 | 5.50 | 4.07  | 5.94 | -6.37  | 4.98  | -0.55 | 0.79 | 0.72 | 0.75 | 0.38 | 0.58 | 0.31 |
| BICR 22   | Head-Neck   | 0.89  | 4.74  | 1.39  | 2.23  | 7.60 | 3.72 | 1.24  | 6.11 | -3.57  | 5.88  | -0.55 | 0.77 | 0.86 | 0.97 | 0.81 | 0.82 | 0.63 |
| CAL 27    | Head-Neck   | 1.83  | 3.28  | 0.80  | -2.07 | 6.57 | 2.51 | 0.08  | 6.14 | -3.69  | 4.33  | -0.70 | 0.81 | 0.91 | 0.96 | 0.62 | 0.66 | 0.34 |
| COLO 680N | Head-Neck   | 3.40  | 5.25  | 1.36  | 2.32  | 8.12 | 3.87 | 2.09  | 6.12 | 0.43   | 6.02  | -0.42 | 0.92 | 0.89 | 0.99 | 0.79 | 0.97 | 0.83 |
| KYSE-140  | Head-Neck   | 1.07  | 5.10  | 4.34  | 2.43  | 7.04 | 5.41 | 4.31  | 4.85 | 1.61   | 5.34  | -0.76 | 0.65 | 0.84 | 1.01 | 0.74 | 0.77 | 0.71 |
| KYSE-150  | Head-Neck   | 3.16  | 2.19  | 1.80  | 0.62  | 7.25 | 3.91 | 1.95  | 5.05 | -6.24  | 4.97  | -0.68 | 0.83 | 0.87 | 1    | 0.69 | 0.75 | 0.63 |
| KYSE-180  | Head-Neck   | -1.20 | 2.44  | 2.30  | 0.62  | 7.58 | 3.51 | 1.22  | 4.80 | 1.71   | 2.92  | -0.78 | 0.67 | 0.84 | 1    | 0.84 | 0.92 | 0.93 |
| KYSE-270  | Head-Neck   | 3.83  | 2.07  | 2.45  | 0.28  | 6.88 | 4.61 | 3.49  | 5.54 | 1.31   | 2.86  | -0.55 | 0.86 | 0.78 | 1.01 | 0.76 | 0.84 | 0.68 |
| KYSE-30   | Head-Neck   | 4.92  | 2.68  | 4.07  | 3.07  | 7.33 | 4.14 | 4.09  | 6.63 | 1.49   | 5.50  | -0.38 | 0.8  | 0.92 | 0.94 | 0.61 | 0.6  | 0.45 |
| KYSE-450  | Head-Neck   | -1.49 | 1.32  | 1.40  | -1.16 | 5.80 | 3.25 | 1.89  | 1.96 | -1.23  | 4.80  | -0.86 | 0.75 | 0.67 | 1.03 | 0.66 | 0.7  | 0.52 |

|            |           |       |       |       |       |       |       |       |       |        |       |       |      |      |      |      |      |      |
|------------|-----------|-------|-------|-------|-------|-------|-------|-------|-------|--------|-------|-------|------|------|------|------|------|------|
| KYSE-510   | Head-Neck | 2.33  | 0.42  | 0.21  | -2.05 | 9.03  | 2.89  | -0.17 | 4.86  | 2.16   | 3.22  | -0.90 | 0.87 | 0.82 | 0.98 | 0.75 | 0.89 | 0.79 |
| KYSE-520   | Head-Neck | 3.97  | 3.39  | 3.68  | 1.91  | 7.77  | 3.27  | 3.04  | 6.03  | 1.25   | 5.28  | -0.41 | 0.82 | 0.81 | 0.97 | 0.67 | 0.72 | 0.57 |
| KYSE-70    | Head-Neck | 0.74  | 1.80  | 2.23  | 1.61  | 5.89  | 5.44  | 5.96  | 5.70  | -1.03  | 6.40  | -0.53 | 0.72 | 0.76 | 1    | 0.77 | 0.88 | 0.74 |
| PE/CA-PJ15 | Head-Neck | 4.33  | 2.64  | 2.57  | 0.27  | 8.25  | 3.44  | 2.69  | 6.01  | 2.13   | 4.73  | -0.46 | 0.88 | 0.84 | 0.95 | 0.66 | 0.69 | 0.49 |
| 769-P      | Kidney    | -0.42 | 2.81  | 2.65  | 1.01  | 7.36  | 2.62  | 3.82  | 5.33  | 1.53   | 5.00  | -0.62 | 0.81 | 0.81 | 0.95 | 0.72 | 0.8  | 0.59 |
| 786-O      | Kidney    | -3.06 | 0.00  | 1.67  | -3.46 | 6.92  | 0.01  | 2.30  | 6.14  | 1.61   | 3.48  | -1.23 | 0.83 | 0.87 | 0.9  | 0.89 | 0.91 | 0.82 |
| A-498      | Kidney    | -1.48 | -1.02 | 0.02  | -0.50 | 4.82  | 0.83  | 2.43  | 5.12  | 0.02   | 3.69  | -0.97 | 0.7  | 0.85 | 0.98 | 0.78 | 0.84 | 0.72 |
| ACHN       | Kidney    | -3.93 | 1.78  | 2.18  | -1.15 | 6.50  | 2.66  | 3.21  | 6.03  | 0.74   | 4.76  | -0.98 | 0.88 | 0.77 | 0.94 | 0.81 | 0.83 | 0.69 |
| BFTC-909   | Kidney    | 0.44  | -0.99 | 2.12  | 1.51  | 4.95  | 2.98  | 3.74  | 5.90  | -3.49  | 3.74  | -0.69 | 0.7  | 0.7  | 0.96 | 0.8  | 0.87 | 0.77 |
| Caki-1     | Kidney    | 0.84  | 4.16  | 2.97  | 1.31  | 5.78  | 1.93  | 4.49  | 5.46  | 1.20   | 5.79  | -0.41 | 0.82 | 0.77 | 0.97 | 0.89 | 0.8  | 0.7  |
| Caki-2     | Kidney    | 4.22  | 2.08  | 1.87  | 1.08  | 6.63  | 4.94  | 4.67  | 5.24  | 1.77   | 5.49  | -0.42 | 0.86 | 0.88 | 0.98 | 0.92 | 0.72 | 0.59 |
| CAL 54     | Kidney    | -1.82 | 3.18  | 3.79  | 2.09  | 7.64  | 3.48  | 3.88  | 6.52  | -0.37  | 6.43  | -0.69 | 0.83 | 0.74 | 0.91 | 0.91 | 0.85 | 0.71 |
| G-402      | Kidney    | -2.93 | -4.41 | 1.48  | 3.46  | 6.46  | 1.69  | 2.46  | 5.61  | -8.16  | 6.19  | -0.84 | 0.72 | 0.63 | 0.96 | 0.72 | 0.84 | 0.69 |
| HCC12      | Kidney    | 6.14  | 6.95  | 3.30  | 5.04  | -0.75 | 5.48  | 5.38  | 2.71  | 0.41   | 4.54  | -0.42 | NaN  | NaN  | NaN  | NaN  | NaN  | NaN  |
| HCC89      | Kidney    | 1.32  | 0.26  | 1.37  | -2.46 | 8.40  | -2.75 | 2.27  | 5.32  | 1.43   | 6.43  | -0.63 | 0.9  | 0.91 | 0.96 | 0.96 | 0.95 | 0.91 |
| TK-10      | Kidney    | -2.90 | 0.75  | 2.76  | 1.39  | 6.59  | 2.85  | 3.16  | 5.25  | -2.51  | 4.82  | -0.91 | 0.83 | 0.84 | 0.9  | 0.8  | 0.75 | 0.65 |
| C3A        | Liver     | -1.49 | 5.26  | 2.17  | 4.29  | 6.57  | 7.10  | 4.65  | 6.27  | -10.25 | 5.28  | -0.58 | 0.94 | 0.91 | 0.93 | 0.79 | 0.76 | 0.59 |
| Hep G2     | Liver     | -0.40 | 5.18  | 2.74  | 4.67  | 7.72  | 6.89  | 5.01  | 5.56  | -6.45  | 5.88  | -0.48 | 0.91 | 0.82 | 0.94 | 0.51 | 0.65 | 0.36 |
| huH-1      | Liver     | 0.81  | 3.06  | 1.89  | 0.68  | 5.65  | 1.49  | 2.10  | 3.95  | -2.20  | 5.02  | -0.69 | 0.87 | 0.75 | 0.91 | 0.82 | 0.82 | 0.7  |
| HUH-7      | Liver     | 3.28  | 5.04  | 4.60  | 4.17  | 6.48  | 5.43  | 4.50  | 5.73  | -10.25 | 4.24  | -0.41 | 0.82 | 0.85 | 0.89 | 0.78 | 0.72 | 0.68 |
| JHH-1      | Liver     | -3.42 | 1.29  | 1.59  | 2.04  | 7.62  | 2.81  | 0.64  | 6.29  | -5.87  | 2.78  | -1.35 | 0.9  | 0.73 | 0.95 | 0.58 | 0.6  | 0.4  |
| JHH-2      | Liver     | -4.73 | 0.86  | 3.66  | 1.71  | 6.32  | 2.32  | 2.65  | 4.62  | 1.41   | 3.35  | -0.82 | 0.87 | 0.9  | 1.01 | 0.74 | 0.81 | 0.74 |
| JHH-4      | Liver     | 4.11  | 4.20  | 4.06  | 2.22  | 7.35  | 4.40  | 3.93  | 6.00  | 0.64   | 7.19  | -0.44 | 0.89 | 0.79 | 0.93 | 0.73 | 0.68 | 0.59 |
| JHH-5      | Liver     | 3.25  | 5.49  | 4.41  | 4.71  | 6.99  | 5.83  | 3.86  | 4.82  | -10.25 | 3.70  | -0.59 | 0.71 | 0.71 | 1.04 | 0.5  | 0.55 | 0.26 |
| JHH-7      | Liver     | 1.52  | 5.06  | 4.46  | 3.45  | 7.16  | 7.13  | 4.42  | 5.23  | -7.09  | 2.68  | -0.59 | 0.94 | 0.95 | 0.96 | 0.76 | 0.84 | 0.72 |
| PLC/PRF/5  | Liver     | 5.07  | 4.31  | 4.29  | 4.52  | 6.88  | 6.16  | 3.72  | 5.22  | -4.40  | 4.27  | -0.42 | 0.96 | 0.92 | 0.94 | 0.94 | 0.92 | 0.85 |
| SNU-182    | Liver     | 1.53  | 2.30  | 4.73  | 3.10  | 7.04  | 3.90  | 3.17  | 5.74  | 1.24   | 1.98  | -0.51 | 0.86 | 0.83 | 1    | 0.77 | 0.77 | 0.62 |
| SNU-387    | Liver     | 1.29  | 1.89  | 5.28  | 1.85  | 8.57  | 2.63  | 4.09  | 5.85  | 0.54   | 3.77  | -0.45 | 0.99 | 1.04 | 0.96 | 0.78 | 0.76 | 0.71 |
| SNU-398    | Liver     | 0.11  | 7.18  | 6.45  | 4.27  | 6.12  | 4.81  | 4.60  | 4.42  | -3.89  | 4.51  | -0.79 | 0.95 | 1.01 | 0.95 | 0.72 | 0.76 | 0.63 |
| SNU-423    | Liver     | 2.01  | 1.65  | 3.51  | 0.79  | 6.24  | 3.51  | 2.63  | 6.23  | 2.08   | 5.25  | -0.54 | 0.8  | 0.79 | 0.9  | 0.89 | 0.88 | 0.8  |
| SNU-449    | Liver     | 3.31  | 2.37  | 4.42  | 2.77  | 7.52  | 5.00  | 3.55  | 6.85  | -4.42  | 5.35  | -0.38 | 0.96 | 0.9  | NaN  | 0.68 | 0.84 | 0.78 |
| SNU-475    | Liver     | 1.98  | -2.05 | 0.34  | 0.68  | 6.47  | 0.69  | 2.26  | 5.44  | -3.38  | 1.38  | -1.06 | 0.83 | 0.83 | 0.94 | 0.94 | 0.91 | 0.89 |
| A549       | Lung      | 5.24  | 2.10  | 2.55  | 1.38  | 5.83  | 4.89  | 3.73  | 4.77  | -2.46  | 4.25  | -0.53 | 0.81 | 0.8  | 0.95 | 0.54 | 0.64 | 0.36 |
| ABC-1      | Lung      | 2.83  | 0.40  | 3.02  | -0.91 | 6.33  | 3.12  | 1.90  | 5.58  | 1.63   | 5.61  | -0.81 | 0.86 | 0.87 | 0.99 | 0.84 | 0.86 | 0.74 |
| BEN        | Lung      | 5.94  | 5.79  | 2.36  | 2.70  | 2.87  | 5.62  | 3.99  | 1.13  | 0.34   | 3.03  | -0.57 | 0.99 | 1    | 0.99 | 0.92 | 0.94 | 0.87 |
| CAL-12T    | Lung      | 5.61  | 4.93  | 2.97  | 2.59  | 7.53  | 5.55  | 2.00  | 6.38  | -4.60  | 5.63  | -0.42 | 0.79 | 0.85 | 0.85 | 0.63 | 0.77 | 0.55 |
| Calu-3     | Lung      | 4.85  | 5.29  | 3.56  | 2.61  | 7.43  | 4.56  | 4.55  | 6.03  | -1.50  | 6.19  | -0.27 | 0.79 | 0.79 | 0.91 | 0.81 | 0.82 | 0.75 |
| ChaGo-K-1  | Lung      | 2.46  | 4.48  | 1.57  | 1.33  | 5.29  | 0.73  | 2.98  | 6.43  | -1.05  | 3.51  | -0.63 | 0.97 | 0.97 | 0.96 | 0.92 | 1    | 0.92 |
| COR-L26    | Lung      | 2.29  | -0.70 | 2.98  | -2.23 | 0.56  | -0.03 | 0.29  | -3.81 | 2.96   | 0.23  | -1.19 | 0.85 | 0.88 | 1.02 | 0.75 | 0.93 | 0.7  |
| COR-L279   | Lung      | 2.86  | 1.28  | -0.36 | -2.86 | -0.48 | 0.61  | -1.74 | -0.99 | 3.28   | 4.65  | -2.17 | 0.81 | 0.81 | 0.99 | 0.98 | 1.03 | 0.97 |
| COR-L47    | Lung      | 0.53  | -0.03 | 1.22  | -3.51 | -1.41 | -1.57 | -3.60 | -1.90 | 0.72   | 1.02  | -1.60 | 0.91 | 0.92 | 1.01 | 1    | 1.02 | 0.95 |
| COR-L88    | Lung      | 2.27  | 1.49  | 3.09  | -2.74 | -1.98 | -1.47 | -2.93 | -3.32 | 2.85   | -0.06 | -1.25 | 0.97 | 1.02 | 1.01 | 0.92 | 0.99 | 0.92 |
| DMS 273    | Lung      | -1.72 | 1.42  | 2.15  | 1.23  | 4.91  | 1.74  | 3.53  | 2.71  | 1.80   | 2.63  | -1.31 | 0.66 | 0.94 | 0.95 | 0.9  | 0.98 | 0.99 |
| DV-90      | Lung      | 6.22  | 2.78  | 3.30  | 2.96  | 7.04  | 5.04  | 4.09  | 7.21  | 0.36   | 2.09  | -0.46 | 0.8  | 0.92 | 0.98 | 0.62 | 0.71 | 0.42 |
| EPLC-272H  | Lung      | 4.30  | 4.42  | 3.15  | 1.90  | 9.33  | 4.34  | 2.34  | 5.67  | 0.94   | 5.63  | -0.40 | 0.78 | 0.78 | 0.94 | 0.78 | 0.89 | 0.73 |
| H322T      | Lung      | 3.73  | 3.28  | 2.53  | 2.09  | 7.11  | 2.79  | 4.41  | 4.93  | -1.30  | 5.02  | -0.84 | 0.9  | 0.86 | 0.97 | 0.72 | 0.73 | 0.56 |
| HCC-15     | Lung      | 5.57  | 4.57  | 3.61  | 4.20  | 4.48  | 4.86  | 4.24  | 6.34  | -1.37  | 6.73  | -0.55 | 0.89 | 0.93 | 0.96 | 0.6  | 0.72 | 0.46 |
| HCC1171    | Lung      | 3.18  | 7.37  | 5.02  | 5.73  | 7.40  | 5.30  | 4.12  | 6.51  | 1.62   | 6.93  | -0.21 | 0.95 | 0.95 | 0.94 | 0.68 | 0.74 | 0.55 |

|            |      |       |       |       |       |       |       |       |       |       |       |       |      |      |      |      |      |      |
|------------|------|-------|-------|-------|-------|-------|-------|-------|-------|-------|-------|-------|------|------|------|------|------|------|
| HCC2279    | Lung | 1.17  | 3.60  | 3.11  | 1.43  | 5.62  | 0.97  | 3.89  | 6.04  | 1.11  | 4.40  | -0.73 | 0.87 | 0.88 | 0.96 | 0.84 | 0.9  | 0.85 |
| HCC2302    | Lung | 5.61  | 2.40  | 2.63  | 2.57  | 6.90  | 4.13  | 2.73  | 6.52  | -1.86 | 4.37  | -0.67 | 0.93 | 0.93 | 1    | 0.8  | 0.87 | 0.72 |
| HCC2885    | Lung | 2.50  | 5.11  | 2.09  | 2.84  | 8.25  | 3.70  | 3.89  | 6.46  | 1.22  | 7.27  | -0.29 | 0.95 | 0.94 | 1    | 0.83 | 0.85 | 0.72 |
| HCC364     | Lung | 5.85  | 5.95  | 3.68  | 2.51  | 5.56  | 1.61  | 3.87  | 6.46  | 1.40  | 6.89  | -0.24 | 0.92 | 0.93 | 0.81 | 0.38 | 0.6  | 0.15 |
| HCC4006    | Lung | 4.03  | 4.38  | 3.06  | 2.22  | 7.95  | 3.37  | 3.41  | 6.15  | 2.32  | 4.83  | -0.40 | 0.89 | 0.87 | 0.93 | 0.78 | 0.71 | 0.71 |
| HCC4011    | Lung | 2.23  | 5.61  | 2.29  | 2.12  | 7.11  | 4.88  | 4.41  | 6.16  | 0.17  | 5.86  | -0.52 | 0.9  | 0.92 | 0.97 | 0.84 | 0.81 | 0.75 |
| HCC4017    | Lung | 5.10  | 5.32  | 4.26  | 4.23  | 6.68  | 4.89  | 3.78  | 7.10  | 0.78  | 7.09  | -0.40 | 0.91 | 0.89 | 0.95 | 0.71 | 0.78 | 0.58 |
| HCC44      | Lung | 3.96  | 4.05  | 4.99  | 2.40  | 6.89  | 3.60  | 4.11  | 6.48  | -4.66 | 6.30  | -0.67 | 0.74 | 0.76 | 0.97 | 0.61 | 0.64 | 0.39 |
| HCC461     | Lung | 5.19  | 3.82  | 3.98  | 3.14  | 7.49  | 4.15  | 3.95  | 6.60  | 1.65  | 6.34  | -0.24 | 0.83 | 0.83 | 0.96 | 0.74 | 0.83 | 0.63 |
| HCC515     | Lung | 4.44  | 3.62  | 3.51  | 2.88  | 8.87  | 3.16  | 4.25  | 6.84  | -5.60 | 6.91  | -0.49 | 0.93 | 0.93 | 0.94 | 0.7  | 0.74 | 0.59 |
| HCC78      | Lung | -0.49 | 2.30  | 2.60  | 0.38  | 7.33  | 2.83  | 3.66  | 5.64  | -0.90 | 4.12  | -0.69 | 0.82 | 0.77 | 0.96 | 0.79 | 0.85 | 0.76 |
| HCC827     | Lung | 2.03  | 3.51  | 3.21  | 0.57  | 7.08  | 3.41  | 3.35  | 5.27  | -0.68 | 5.13  | -0.45 | 0.75 | 0.81 | 0.96 | 0.71 | 0.69 | 0.58 |
| HOP-62     | Lung | 2.72  | 4.20  | 3.81  | 3.19  | 7.94  | 4.59  | 4.37  | 7.42  | 1.28  | 6.00  | -0.39 | 0.98 | 0.91 | 0.87 | 0.76 | 0.72 | 0.7  |
| HOP-92     | Lung | 1.59  | 4.94  | 4.49  | 3.38  | 7.15  | 4.15  | 4.25  | 5.66  | -0.43 | 5.29  | -0.68 | 0.92 | 0.86 | 0.99 | 0.63 | 0.62 | 0.52 |
| HT-1080    | Lung | 4.93  | -2.12 | 4.40  | 3.28  | 7.37  | 4.55  | 4.68  | 6.89  | 0.85  | 7.22  | -0.39 | 0.89 | 0.94 | 0.92 | 0.73 | 0.82 | 0.57 |
| KNS-62     | Lung | -1.01 | 7.07  | 2.93  | 2.70  | 5.88  | 4.91  | 4.76  | 5.01  | -0.73 | 6.56  | -0.67 | 0.68 | 0.87 | 0.98 | 0.64 | 0.73 | 0.48 |
| LCLC-103H  | Lung | 1.25  | 0.26  | 1.13  | -1.48 | 4.98  | 2.63  | 2.23  | 5.49  | -1.91 | 4.19  | -0.86 | 0.9  | 0.88 | 0.94 | 0.83 | 0.94 | 0.89 |
| LCLC-97TM1 | Lung | 2.14  | 6.00  | 3.16  | 2.52  | 7.17  | 4.34  | 3.94  | 5.88  | -1.01 | 6.71  | -0.35 | 0.86 | 0.88 | 0.99 | 0.7  | 0.79 | 0.48 |
| LXF-289    | Lung | 4.40  | -0.26 | 2.77  | -1.12 | 6.51  | 3.91  | 3.97  | 5.35  | -0.10 | 4.19  | -0.62 | 0.82 | 0.83 | 0.96 | 0.69 | 0.76 | 0.59 |
| LXFL529    | Lung | 1.28  | 7.76  | 5.86  | 5.91  | 5.44  | 6.04  | 4.79  | 4.31  | -6.61 | 4.86  | -0.39 | 0.7  | 0.7  | 1.09 | 0.86 | 0.82 | 0.7  |
| MOR        | Lung | 5.62  | 5.20  | 3.30  | 4.20  | 6.97  | 7.51  | 4.84  | 4.64  | 0.55  | 5.70  | -0.30 | 0.94 | 0.94 | 0.96 | 0.88 | 0.88 | 0.83 |
| NCI-H1155  | Lung | 5.27  | 5.31  | 2.64  | 4.77  | -0.82 | 4.68  | 4.33  | 1.61  | 1.26  | 4.59  | -0.74 | 0.85 | 1.01 | 0.98 | 1.01 | 1.04 | 1.11 |
| NCI-H1299  | Lung | -6.02 | 4.22  | 4.45  | 4.67  | 6.90  | 3.90  | 4.53  | 6.19  | -2.87 | 6.11  | -0.68 | 0.88 | 0.86 | 0.98 | 0.65 | 0.69 | 0.53 |
| NCI-H1355  | Lung | 5.54  | 1.51  | 4.10  | 0.67  | 5.22  | 4.24  | 3.62  | 5.73  | -3.65 | 4.77  | -0.76 | 0.93 | 0.89 | 0.92 | 0.74 | 0.76 | 0.66 |
| NCI-H1437  | Lung | 5.94  | 4.04  | 1.59  | 2.44  | 6.20  | 4.79  | 3.58  | 2.82  | -2.86 | 4.52  | -0.70 | 0.86 | 0.83 | 0.94 | 0.53 | 0.74 | 0.4  |
| NCI-H146   | Lung | 4.39  | 3.32  | 1.72  | -0.19 | -2.11 | 3.27  | 2.30  | 0.08  | 0.61  | 1.54  | -0.99 | 0.96 | 0.99 | 0.98 | 0.91 | 0.97 | 0.94 |
| NCI-H1581  | Lung | -4.26 | 8.32  | 6.02  | 2.31  | 6.14  | 6.69  | 4.99  | 4.23  | -6.07 | 2.37  | -0.84 | 0.98 | 0.99 | 1    | 0.74 | 0.87 | 0.71 |
| NCI-H1651  | Lung | -0.89 | 4.15  | 3.27  | 0.80  | 5.35  | 4.08  | 3.76  | 5.52  | 0.05  | 3.52  | -0.66 | 0.99 | 0.9  | 0.96 | 0.89 | 0.92 | 0.79 |
| NCI-H1666  | Lung | 6.22  | 5.16  | 2.11  | 1.31  | 5.67  | 3.71  | 1.85  | 6.62  | -0.88 | 7.59  | -0.72 | 0.83 | 0.77 | 0.99 | 0.64 | 0.75 | 0.54 |
| NCI-H1703  | Lung | -3.96 | 1.00  | 0.45  | 4.21  | 4.57  | 2.74  | 3.66  | 5.70  | -2.62 | 4.61  | -1.09 | 0.79 | 0.69 | 0.92 | 0.87 | 0.95 | 0.92 |
| NCI-H1838  | Lung | 2.84  | 6.31  | 4.72  | 2.36  | 7.39  | 4.42  | 4.08  | 6.17  | 2.72  | 6.64  | -0.47 | 0.86 | 0.86 | 0.89 | 0.86 | 0.89 | 0.94 |
| NCI-H1869  | Lung | 1.91  | 3.91  | 4.58  | 2.27  | 7.69  | 0.94  | 3.93  | 6.22  | 2.64  | 5.37  | -0.59 | 0.95 | 0.89 | 0.95 | 0.75 | 0.83 | 0.72 |
| NCI-H187   | Lung | -0.12 | 0.17  | -6.65 | -4.08 | -1.63 | -1.41 | -0.31 | -2.79 | -1.14 | 0.82  | -2.30 | 0.74 | 0.86 | 1.02 | 1.03 | 0.99 | 0.93 |
| NCI-H1930  | Lung | 2.42  | 2.90  | 3.45  | 0.75  | -2.99 | 3.13  | 3.20  | -0.29 | 3.17  | 1.90  | -1.31 | 1.08 | 0.83 | 1.03 | 1.08 | 1.01 | 0.99 |
| NCI-H1944  | Lung | 4.27  | 2.88  | 1.87  | 1.30  | 5.08  | 3.56  | 3.92  | 3.85  | -7.64 | 2.02  | -0.75 | 0.85 | 0.85 | 0.93 | 0.72 | 0.78 | 0.6  |
| NCI-H196   | Lung | -0.77 | 3.05  | 3.32  | 2.66  | -1.72 | 3.68  | 4.33  | 5.08  | -0.31 | 3.51  | -1.10 | 0.89 | 0.9  | 1.03 | 0.92 | 0.94 | 0.94 |
| NCI-H2009  | Lung | 3.01  | 3.90  | 2.41  | 0.98  | 5.60  | 2.41  | 3.18  | 6.19  | 0.65  | 6.34  | -0.51 | 0.89 | 0.87 | 0.87 | 0.58 | 0.68 | 0.44 |
| NCI-H2023  | Lung | 4.33  | 1.42  | 0.89  | 2.54  | 5.65  | 4.14  | 4.10  | 6.63  | -3.82 | 4.42  | -0.46 | 0.77 | 0.79 | 0.97 | 0.74 | 0.86 | 0.76 |
| NCI-H2106  | Lung | -1.64 | -1.04 | -2.08 | -0.84 | -4.02 | 0.34  | 4.20  | 0.92  | -1.00 | -0.83 | -1.58 | 0.83 | 0.84 | 1    | 0.99 | 1.02 | 0.91 |
| NCI-H2110  | Lung | 6.44  | 4.90  | 4.72  | 1.56  | 7.16  | 5.15  | 3.60  | 6.36  | -5.65 | 4.32  | -0.61 | 0.93 | 0.97 | 0.98 | 0.89 | 0.91 | 0.81 |
| NCI-H2122  | Lung | 6.50  | 4.26  | 2.92  | 3.04  | 7.34  | 3.38  | 1.78  | 6.61  | 0.04  | 6.07  | -0.37 | 0.93 | 0.94 | 0.96 | 0.64 | 0.6  | 0.34 |
| NCI-H2135  | Lung | -6.99 | 5.32  | 4.74  | 6.35  | 6.46  | 5.22  | 3.91  | 6.33  | -3.34 | 8.43  | -0.63 | 0.97 | 0.97 | 0.99 | 0.59 | 0.69 | 0.32 |
| NCI-H2170  | Lung | 5.17  | 1.77  | 3.10  | 1.20  | 6.48  | 4.28  | 2.33  | 4.75  | -0.66 | 0.88  | -0.81 | 0.94 | 0.91 | 0.96 | 1.05 | 1.02 | 1.04 |
| NCI-H2171  | Lung | 1.08  | -3.78 | -2.69 | -3.22 | 3.14  | -0.91 | -1.43 | -1.58 | 3.69  | 5.42  | -1.70 | 0.86 | 0.81 | 1.01 | 0.95 | 1.05 | 0.96 |
| NCI-H2228  | Lung | 4.66  | 4.03  | 3.60  | 1.89  | 6.35  | 2.97  | 5.23  | 5.64  | 0.08  | 6.24  | -0.34 | 0.81 | 0.81 | 0.95 | 0.84 | 0.77 | 0.76 |
| NCI-H226   | Lung | 0.21  | -1.42 | 1.04  | 1.52  | 6.56  | 0.95  | 2.29  | 6.28  | 3.49  | 2.84  | -0.58 | 0.96 | 0.88 | 1    | 0.76 | 0.81 | 0.65 |
| NCI-H23    | Lung | 2.40  | 4.92  | 3.44  | 4.81  | 7.11  | 4.98  | 5.38  | 5.14  | -6.37 | 4.93  | -0.64 | 0.91 | 0.9  | 0.95 | 0.56 | 0.61 | 0.47 |
| NCI-H2347  | Lung | 5.23  | 6.95  | 4.34  | 3.61  | 8.40  | 5.68  | 3.80  | 6.72  | 1.98  | 6.60  | -0.17 | 0.91 | 0.86 | 0.94 | 0.63 | 0.72 | 0.52 |

|            |          |       |       |       |        |       |       |       |       |        |       |       |      |      |      |      |      |      |
|------------|----------|-------|-------|-------|--------|-------|-------|-------|-------|--------|-------|-------|------|------|------|------|------|------|
| NCI-H2369  | Lung     | 1.83  | 2.66  | 2.76  | 2.49   | 6.85  | 2.23  | 3.50  | 6.18  | 2.80   | 4.61  | -0.47 | 0.92 | 0.94 | 0.88 | 0.86 | 0.91 | 0.83 |
| NCI-H2373  | Lung     | -3.54 | 1.20  | 2.64  | 1.82   | 7.37  | 0.62  | 3.14  | 5.63  | 3.01   | 4.81  | -0.62 | 0.77 | 0.85 | 0.97 | 0.76 | 0.84 | 0.68 |
| NCI-H2452  | Lung     | -0.70 | 1.11  | 1.35  | -0.39  | 6.61  | 0.20  | 2.59  | 5.63  | -0.32  | 4.45  | -0.86 | 0.87 | 0.84 | 1.05 | 0.83 | 0.86 | 0.74 |
| NCI-H2461  | Lung     | 1.34  | 1.53  | 1.82  | 1.95   | 6.09  | 2.21  | 3.21  | 5.49  | 3.61   | 4.24  | -0.53 | 0.77 | 0.79 | 0.96 | 0.78 | 0.84 | 0.68 |
| NCI-H2595  | Lung     | 0.56  | 1.44  | 2.34  | 2.97   | 6.22  | 3.96  | 4.43  | 7.44  | 1.12   | 3.56  | -0.55 | 0.87 | 0.89 | 0.94 | 0.8  | 0.85 | 0.73 |
| NCI-H2722  | Lung     | 1.61  | 2.67  | 1.92  | 2.28   | 7.88  | 3.49  | 3.80  | 5.79  | 1.87   | 4.62  | -0.37 | 0.93 | 0.96 | 0.94 | 0.84 | 0.85 | 0.78 |
| NCI-H2803  | Lung     | 1.41  | 0.62  | 2.20  | -0.17  | 8.11  | 0.64  | 2.65  | 7.31  | 0.94   | 2.23  | -0.71 | 0.97 | 1    | 0.97 | 0.78 | 0.84 | 0.71 |
| NCI-H2804  | Lung     | 2.46  | 3.02  | 1.41  | 2.51   | 6.53  | 3.94  | 4.66  | 6.50  | 1.67   | 4.76  | -0.39 | 0.92 | 0.92 | 0.94 | 0.87 | 0.9  | 0.88 |
| NCI-H2810  | Lung     | 0.12  | 4.00  | 2.99  | 3.57   | 6.95  | 4.32  | 4.73  | 5.49  | 2.04   | 5.41  | -0.49 | 0.85 | 0.76 | 1.02 | 0.63 | 0.71 | 0.58 |
| NCI-H292   | Lung     | 3.41  | 1.30  | 2.43  | -2.27  | 5.93  | 0.34  | 0.11  | 4.39  | 2.08   | 5.01  | -0.75 | 0.89 | 0.78 | 0.98 | 0.5  | 0.64 | 0.36 |
| NCI-H358   | Lung     | 4.80  | 5.19  | 3.73  | 2.46   | 7.85  | 4.43  | 3.83  | 7.08  | 1.58   | 7.01  | -0.30 | 0.87 | 0.89 | 0.91 | 0.66 | 0.65 | 0.48 |
| NCI-H441   | Lung     | -0.44 | 5.74  | 3.17  | 1.54   | 6.72  | 3.97  | 4.05  | 5.94  | 0.98   | 5.48  | -0.42 | 0.92 | 0.85 | 0.99 | 0.79 | 0.84 | 0.74 |
| NCI-H446   | Lung     | 1.94  | 2.44  | 1.10  | 0.54   | 3.30  | 1.53  | 3.38  | 1.39  | 3.92   | 4.98  | -1.02 | 0.68 | 0.76 | 0.94 | 0.87 | 0.87 | 0.87 |
| NCI-H460   | Lung     | 6.00  | 5.47  | 3.06  | 3.51   | 5.26  | 6.79  | 4.22  | 4.61  | 3.71   | 4.70  | -0.34 | 0.82 | 0.87 | 0.92 | 0.72 | 0.8  | 0.6  |
| NCI-H520   | Lung     | 1.23  | 5.40  | 4.06  | 5.11   | 6.27  | 5.09  | 6.22  | 2.45  | -0.18  | 6.22  | -0.32 | 0.72 | 0.89 | 0.9  | 0.86 | 0.85 | 0.82 |
| NCI-H522   | Lung     | -3.11 | 5.76  | -3.16 | 2.72   | 4.37  | 5.78  | 3.90  | 5.64  | -2.38  | -2.31 | -1.06 | 0.94 | 0.89 | 0.96 | 0.82 | 0.86 | 0.81 |
| NCI-H650   | Lung     | 1.61  | 5.83  | 5.33  | 6.28   | 7.34  | 5.84  | 3.44  | 5.54  | 0.60   | 6.80  | -0.31 | 0.91 | 0.97 | 0.95 | 0.74 | 0.73 | 0.57 |
| NCI-H727   | Lung     | 6.18  | 7.43  | 4.58  | 4.42   | 8.15  | 5.57  | 3.09  | 5.86  | 3.73   | 4.99  | -0.11 | 0.83 | 0.94 | 1.02 | 0.48 | 0.63 | 0.26 |
| NCI-H82    | Lung     | 0.77  | -3.36 | -2.09 | -6.75  | -3.01 | -3.59 | -1.80 | 1.08  | 1.67   | 0.69  | -1.42 | 0.95 | 0.9  | 1    | 0.94 | 1.02 | 0.89 |
| NCI-H889   | Lung     | 3.29  | 2.84  | 0.91  | 1.61   | 0.04  | 0.36  | -0.43 | -1.91 | 0.12   | 1.89  | -1.07 | 0.97 | 0.96 | 0.97 | 0.93 | 1.01 | 0.95 |
| NCI-N417   | Lung     | -4.16 | -1.97 | 1.43  | -0.52  | 4.18  | -1.24 | 2.05  | 3.56  | 0.06   | 4.32  | -0.88 | 0.71 | 0.72 | 0.96 | 1.03 | 1.01 | 0.95 |
| RERF-LC-KJ | Lung     | 5.24  | 3.21  | 2.93  | 1.89   | 7.37  | 1.50  | -0.60 | 5.32  | -3.81  | 4.66  | -0.63 | 0.86 | 0.84 | 1.03 | 0.77 | 0.8  | 0.74 |
| RERF-LC-MS | Lung     | 4.47  | 3.97  | 3.41  | 4.45   | 5.80  | 4.90  | 5.01  | 5.07  | 1.80   | 7.12  | -0.33 | 0.89 | 0.84 | 0.97 | 0.66 | 0.69 | 0.53 |
| RERF-LC-OK | Lung     | -2.47 | 0.73  | 1.44  | 0.35   | 6.32  | 1.78  | 2.59  | 4.88  | 0.01   | 4.35  | -1.07 | 0.76 | 0.7  | 0.95 | 0.83 | 0.85 | 0.75 |
| SCLC-21H   | Lung     | -2.01 | -0.71 | -0.30 | -2.27  | 2.27  | -3.66 | -0.11 | -2.02 | 2.78   | 1.10  | -2.13 | 0.91 | 0.89 | 0.96 | 0.91 | 1.02 | 1.04 |
| SCLC-22H   | Lung     | -1.77 | -1.50 | -2.67 | -2.01  | 3.66  | -3.19 | 0.42  | -2.75 | 1.30   | -1.01 | -2.56 | 0.91 | 0.89 | 1    | 0.93 | 0.98 | 0.94 |
| SK-MES-1   | Lung     | 3.69  | 2.54  | 4.18  | 2.26   | 7.88  | 3.59  | 4.48  | 7.12  | 1.22   | 5.95  | -0.37 | 0.93 | 0.88 | 0.92 | 0.68 | 0.69 | 0.56 |
| SW 1573    | Lung     | -0.75 | 5.52  | 5.04  | 5.39   | 6.01  | 5.15  | 4.42  | 6.21  | 3.98   | 7.49  | -0.18 | 0.81 | 0.79 | 0.94 | 0.81 | 0.82 | 0.76 |
| UMC-11     | Lung     | 5.45  | 3.77  | 1.83  | 1.83   | 0.02  | 4.94  | 4.81  | -3.44 | 2.71   | -1.34 | -1.22 | 1.01 | 1.03 | 0.96 | 0.88 | 0.95 | 0.85 |
| VMRC-LCD   | Lung     | 1.21  | -1.53 | -0.20 | -3.98  | 3.81  | -1.43 | -0.73 | -0.99 | 2.66   | 0.64  | -1.44 | 0.99 | 1    | 0.98 | 0.89 | 0.97 | 0.94 |
| AMO-1      | Lymphoid | 1.65  | 4.24  | 2.25  | 2.58   | 2.16  | 4.16  | 4.16  | -5.18 | -1.44  | -2.26 | -0.69 | 0.94 | 0.96 | 0.99 | 0.85 | 0.9  | 0.72 |
| BJAB       | Lymphoid | -4.16 | 2.20  | -5.32 | -0.68  | 3.07  | 3.59  | 2.99  | -3.69 | -2.03  | -2.37 | -1.30 | 0.68 | 0.83 | 1.01 | 0.88 | 0.98 | 0.95 |
| CA46       | Lymphoid | -4.59 | -3.19 | -9.55 | -10.79 | -1.22 | -4.43 | -3.32 | -4.69 | -4.97  | -2.06 | -2.04 | 0.85 | 0.96 | 1.06 | 0.89 | 1.06 | 1    |
| CI-1       | Lymphoid | 1.93  | 4.28  | -6.99 | -2.29  | 0.23  | -2.89 | 3.65  | -5.26 | 1.48   | -0.92 | -1.46 | 0.85 | 0.72 | 1.08 | 0.91 | 1.04 | 0.97 |
| Daudi      | Lymphoid | -5.28 | -4.54 | -9.55 | -7.01  | -0.82 | -3.03 | 1.74  | -2.53 | -2.82  | -3.45 | -2.53 | 0.63 | 0.41 | 1.03 | 1.02 | 1.11 | 0.99 |
| DB         | Lymphoid | -5.84 | -3.89 | -9.55 | -5.37  | -1.93 | -3.08 | -5.74 | -4.43 | -4.72  | -4.64 | -2.36 | 0.93 | 1.02 | 1.09 | 0.96 | 1.07 | 1.08 |
| DOHH-2     | Lymphoid | -7.54 | -3.34 | -9.55 | -6.34  | -3.00 | -4.56 | -4.01 | -5.92 | -10.25 | -2.50 | -3.32 | 0.52 | 0.94 | 0.94 | 0.81 | 0.98 | 0.99 |
| EB-3       | Lymphoid | -9.54 | -2.11 | -5.34 | -10.79 | -1.43 | -5.23 | -0.59 | -4.68 | 2.62   | -3.02 | -1.46 | 0.94 | 0.87 | 1.06 | 0.95 | 1.05 | 1.02 |
| EB1        | Lymphoid | -2.98 | -4.15 | -3.83 | -2.98  | -2.53 | -1.48 | 1.70  | -9.25 | -1.78  | -0.98 | -1.35 | 0.72 | 0.72 | 0.95 | 0.94 | 1.01 | 1.03 |
| EB2        | Lymphoid | -2.11 | -3.04 | -2.54 | -3.17  | -1.85 | -1.14 | 2.63  | -4.53 | -0.77  | -0.43 | -1.34 | 0.78 | 0.72 | 0.99 | 0.99 | 1.08 | 1.06 |
| EJM        | Lymphoid | -0.23 | -2.14 | -6.67 | -5.28  | -3.40 | -1.65 | -2.55 | -5.37 | 0.14   | -3.77 | -2.47 | 0.87 | 0.9  | 0.99 | 0.93 | 0.96 | 0.9  |
| GA-10      | Lymphoid | -2.26 | -0.93 | -5.26 | -10.79 | -1.17 | 1.98  | -5.06 | -9.25 | -1.63  | -3.14 | -1.70 | NaN  | 0.37 | 0.98 | 0.93 | 0.98 | 1.02 |
| GRANTA-519 | Lymphoid | -0.55 | -2.64 | 3.88  | -0.62  | 9.39  | 3.31  | 2.45  | 0.42  | -2.54  | 1.85  | -0.86 | 0.96 | 1.06 | 1.05 | 0.97 | 1.05 | 1.02 |
| HEL        | Lymphoid | 0.17  | 5.62  | 3.29  | -6.45  | 3.26  | 4.78  | 5.73  | -4.55 | -6.74  | 2.03  | -1.34 | 0.99 | 0.91 | 0.98 | 0.84 | 0.91 | 0.87 |
| HNT-34     | Lymphoid | 6.45  | 6.73  | 4.56  | 3.01   | -1.01 | 4.98  | 4.59  | -3.76 | -10.25 | 2.15  | -0.96 | 0.86 | 0.92 | 0.94 | 0.62 | 0.7  | 0.46 |
| HS-Sultan  | Lymphoid | -7.23 | 1.66  | -9.55 | -3.04  | -2.81 | -3.68 | 1.84  | -7.25 | -0.44  | 0.03  | -1.80 | 0.69 | 0.96 | 1    | 0.95 | 0.98 | 0.95 |
| HT         | Lymphoid | -9.54 | -1.93 | -9.55 | -1.07  | -2.55 | 4.31  | -0.43 | -4.95 | -0.80  | -5.19 | -1.78 | 0.66 | 0.76 | 1.06 | 0.91 | 0.97 | 0.95 |

|             |          |       |       |       |        |       |       |       |       |        |       |       |      |      |      |      |      |      |
|-------------|----------|-------|-------|-------|--------|-------|-------|-------|-------|--------|-------|-------|------|------|------|------|------|------|
| JEKO-1      | Lymphoid | -7.31 | -2.84 | 0.78  | -7.00  | 9.47  | -3.40 | -3.12 | -1.39 | -2.95  | -2.28 | -1.43 | 0.84 | 0.46 | 0.95 | 0.92 | 1.13 | 0.98 |
| Jiyoye      | Lymphoid | -3.61 | -2.85 | -1.07 | -4.40  | -0.17 | -1.52 | 0.96  | -2.42 | -0.15  | 0.14  | -1.24 | 0.8  | 0.84 | 1.14 | 0.88 | NaN  | 0.8  |
| JJN-3       | Lymphoid | 1.55  | 2.94  | 2.12  | -1.27  | -3.04 | 1.39  | -3.25 | -0.85 | 0.95   | 0.50  | -1.46 | 0.89 | 0.93 | 0.97 | 0.87 | 0.96 | 0.83 |
| K-562       | Lymphoid | -3.03 | -5.01 | 1.75  | 1.38   | -0.32 | 4.64  | 2.18  | -4.28 | -6.32  | -0.90 | -1.83 | 0.92 | 0.91 | 0.94 | 0.7  | 0.71 | 0.5  |
| KARPAS-1106 | Lymphoid | 3.47  | -2.27 | -4.31 | -3.41  | 1.53  | -0.56 | 1.45  | -9.25 | -0.19  | -3.16 | -1.32 | 0.86 | 0.6  | 1.09 | 0.77 | 0.94 | 0.83 |
| KARPAS-422  | Lymphoid | 3.79  | 4.96  | -9.55 | -2.05  | -3.07 | 4.05  | 4.96  | -5.38 | -10.25 | 2.86  | -1.35 | 0.58 | 0.79 | 1.05 | 0.83 | 0.97 | 0.86 |
| KARPAS-620  | Lymphoid | 3.93  | 4.72  | 1.81  | 2.85   | 8.46  | 1.92  | 3.27  | 0.55  | -2.69  | 1.23  | -1.04 | 0.63 | 0.88 | 1.04 | 0.71 | 0.78 | 0.59 |
| KG-1        | Lymphoid | 1.15  | 5.23  | 2.58  | -2.20  | -3.35 | 2.00  | 2.22  | -2.95 | -4.15  | -0.50 | -1.59 | 1.01 | 0.95 | 1.08 | 0.78 | 0.85 | 0.64 |
| KHM-1B      | Lymphoid | -5.80 | 2.32  | -9.55 | -10.79 | -3.89 | -0.93 | 1.83  | -6.40 | -10.25 | -3.94 | -4.81 | 0.69 | 0.82 | 1.06 | 0.85 | 0.92 | 0.76 |
| KMM-1       | Lymphoid | 4.40  | 1.54  | 0.65  | 0.69   | -2.06 | 3.32  | 1.88  | -2.23 | -10.25 | 2.11  | -1.80 | 0.82 | 0.78 | 1.04 | 0.51 | 0.74 | 0.27 |
| KMS-11      | Lymphoid | 1.95  | 4.30  | -0.38 | -0.27  | -2.74 | 3.76  | 3.11  | -1.92 | -4.85  | -2.66 | -1.88 | 0.91 | 0.79 | 0.97 | 0.92 | 0.99 | 0.81 |
| KMS-12-BM   | Lymphoid | -4.57 | -5.20 | -6.82 | -6.64  | 7.82  | 1.18  | -5.18 | -4.02 | -10.25 | -1.51 | -3.49 | 0.83 | 0.84 | 0.97 | 0.96 | 1.02 | 1.01 |
| KMS-12-PE   | Lymphoid | -5.58 | -5.69 | -9.55 | -6.28  | 7.90  | 2.95  | -5.09 | -2.13 | -6.57  | 2.03  | -3.74 | 0.89 | 0.89 | 1    | 1.02 | 1.04 | 1.03 |
| KMS-21BM    | Lymphoid | 2.95  | 3.76  | -0.20 | -0.13  | 7.93  | 3.87  | 2.95  | -4.80 | -10.25 | 2.96  | -0.89 | 0.87 | 0.85 | 0.96 | 0.62 | 0.58 | 0.28 |
| KMS-26      | Lymphoid | 2.99  | 1.32  | -0.13 | -3.63  | -3.03 | -1.60 | -0.60 | -5.96 | -0.98  | 2.92  | -1.14 | 0.68 | 0.71 | 1    | 0.89 | 0.97 | 0.81 |
| KMS-27      | Lymphoid | 3.68  | 0.60  | -4.46 | 0.49   | 8.01  | 4.98  | 3.65  | -5.07 | 0.54   | -3.26 | -1.39 | 0.91 | 0.93 | 1.03 | 0.75 | 0.88 | 0.55 |
| KMS-28PE    | Lymphoid | -1.14 | 5.47  | 2.35  | -1.02  | -2.53 | 3.33  | 4.73  | -5.13 | -6.37  | 2.99  | -1.36 | 0.74 | 0.83 | 1.04 | 0.84 | 0.92 | 0.79 |
| KMS-34      | Lymphoid | 0.19  | 0.48  | -1.15 | -6.14  | 0.20  | -0.30 | -0.08 | -6.39 | -3.94  | 0.09  | -2.12 | 0.71 | 0.68 | 0.96 | 0.96 | 1.05 | 0.94 |
| KU812       | Lymphoid | -4.31 | 2.04  | 3.09  | -0.53  | 2.75  | 2.43  | 2.51  | -2.11 | -1.25  | -0.49 | -1.28 | 0.96 | 0.96 | 0.97 | 0.57 | 0.7  | 0.35 |
| L-363       | Lymphoid | 4.07  | 2.93  | -6.65 | -1.19  | -1.46 | 4.48  | 4.57  | -4.89 | -6.73  | 2.06  | -2.63 | 0.68 | 0.76 | 0.99 | 0.91 | 1.01 | 0.93 |
| LP-1        | Lymphoid | 0.48  | -3.08 | -9.55 | -10.79 | -0.43 | -1.64 | -2.41 | -3.83 | 0.00   | -2.54 | -2.08 | 0.86 | 0.82 | 0.92 | 0.91 | 0.99 | 0.94 |
| MC116       | Lymphoid | -4.94 | -4.46 | -5.13 | -3.11  | -3.03 | -0.09 | 2.34  | -5.95 | -5.73  | -1.84 | -2.04 | 0.72 | NaN  | 0.94 | 0.89 | 1.07 | 1.06 |
| MHH-PREB-1  | Lymphoid | -7.20 | 2.15  | -9.55 | 0.24   | -2.30 | -4.67 | -4.89 | -6.41 | -10.25 | -2.20 | -2.84 | 0.85 | 0.92 | 1.02 | 0.88 | 1.02 | 1.08 |
| ML-2        | Lymphoid | 1.27  | 4.68  | 3.68  | -4.62  | 0.72  | 3.83  | 4.44  | -3.00 | -10.25 | 1.60  | -1.49 | 0.9  | 0.79 | 0.94 | 0.55 | 0.66 | 0.26 |
| MM.1S       | Lymphoid | 4.50  | 3.98  | -3.26 | -3.80  | 0.27  | -1.04 | 0.97  | -9.25 | -5.47  | 3.32  | -2.13 | 0.61 | 0.81 | 1.1  | 0.83 | 0.89 | 0.72 |
| MOLM-16     | Lymphoid | -9.54 | 1.56  | 2.94  | -10.79 | -0.67 | 1.49  | 2.87  | -1.66 | -2.60  | -2.88 | -2.56 | 0.9  | 0.72 | 0.99 | 0.66 | 0.77 | 0.5  |
| MOLP-8      | Lymphoid | 4.05  | 4.88  | 1.64  | 1.65   | 8.56  | 2.98  | 3.99  | -4.45 | -0.26  | 1.50  | -0.59 | 0.75 | 0.76 | 1.03 | 0.79 | 0.9  | 0.68 |
| MV-4-11     | Lymphoid | 0.50  | 5.21  | 2.17  | -2.78  | 1.88  | 2.33  | 3.84  | -4.15 | -10.25 | 1.52  | -1.88 | 0.93 | 0.91 | 0.99 | 0.6  | 0.72 | 0.46 |
| NALM-6      | Lymphoid | -2.06 | 4.03  | 3.49  | -2.31  | -0.40 | -1.69 | 2.58  | -3.95 | -2.72  | 0.48  | -1.95 | 0.77 | 0.7  | 1.01 | 0.74 | 0.84 | 0.69 |
| NAMALWA     | Lymphoid | -9.54 | -4.52 | -9.55 | -6.99  | -3.74 | -3.18 | -3.06 | -9.25 | 2.09   | -2.48 | -2.04 | 0.86 | NaN  | 0.98 | 0.98 | 1.11 | 1.04 |
| NCI-H929    | Lymphoid | 3.17  | 6.33  | -0.98 | 1.59   | 4.28  | 3.98  | 4.02  | -4.80 | -0.79  | 3.25  | -0.78 | 0.64 | 0.63 | 1.04 | 0.77 | 0.7  | 0.57 |
| OCI-AML2    | Lymphoid | 0.12  | 5.23  | 4.22  | 0.28   | 1.72  | 3.39  | 4.58  | -4.33 | -10.25 | -1.64 | -1.67 | 0.92 | 0.85 | 1.25 | 0.15 | 0.51 | 0.03 |
| OCI-AML3    | Lymphoid | 0.79  | 1.49  | 5.41  | 3.13   | 3.95  | 2.47  | 2.97  | -2.33 | -10.25 | 1.33  | -1.32 | 0.78 | 0.89 | 1.13 | 0.41 | 0.58 | 0.19 |
| OCI-AML5    | Lymphoid | -9.54 | 6.05  | 3.96  | -3.28  | 0.67  | 1.49  | 4.89  | -3.92 | -6.14  | -0.46 | -1.47 | 0.91 | 0.79 | 1.04 | 0.66 | 0.72 | 0.54 |
| OCI-LY-10   | Lymphoid | -9.54 | -2.85 | -9.55 | -6.25  | -3.76 | 2.45  | 1.59  | -5.84 | 2.49   | 5.00  | -1.97 | 0.72 | 0.42 | 0.94 | 0.8  | 0.93 | 0.9  |
| OCI-LY-19   | Lymphoid | -4.33 | 5.80  | -9.55 | 2.77   | -2.84 | 4.29  | 4.10  | -9.25 | -10.25 | -2.67 | -1.74 | 0.85 | 0.85 | 1.04 | 0.65 | 0.76 | 0.5  |
| OCI-M1      | Lymphoid | -2.65 | 3.74  | 3.82  | -2.50  | 5.38  | 4.83  | 3.06  | -4.77 | -3.63  | 1.44  | -1.92 | 0.99 | 1    | 0.98 | 0.68 | 0.7  | 0.56 |
| OCI-M2      | Lymphoid | -1.62 | 4.58  | 4.59  | 3.22   | 3.77  | 3.86  | 4.26  | -0.06 | 1.90   | 1.85  | -0.71 | 0.84 | 0.8  | 1.14 | 0.26 | 0.5  | 0.03 |
| OPM-2       | Lymphoid | 5.39  | 2.92  | 0.82  | -3.64  | -1.48 | 0.28  | 1.65  | -4.49 | -1.45  | 0.33  | -1.29 | 0.7  | 0.95 | 1.02 | 0.73 | 0.75 | 0.73 |
| PL-21       | Lymphoid | 1.18  | 4.23  | 4.40  | -4.61  | -2.68 | 0.82  | 4.05  | -5.41 | -7.54  | 0.60  | -2.99 | 0.76 | 0.74 | 0.96 | 0.56 | 0.71 | 0.33 |
| RAJI        | Lymphoid | -9.54 | -4.28 | -9.55 | -10.79 | -2.40 | -3.39 | 2.13  | -4.84 | -7.87  | -1.48 | -2.28 | 0.93 | 0.95 | 1.04 | 0.95 | 1.04 | 1.06 |
| REC-1       | Lymphoid | -4.36 | -2.32 | -0.12 | -3.53  | 9.45  | 1.08  | 0.34  | -3.19 | -2.72  | 2.74  | -1.42 | 0.98 | 0.82 | 0.93 | 0.92 | 1.01 | 1.04 |
| RI-1        | Lymphoid | -3.63 | -2.33 | 1.91  | -6.99  | -1.93 | 0.68  | 1.03  | -3.16 | 2.44   | -0.61 | -1.79 | 0.75 | 0.57 | 1.01 | 0.92 | 1.03 | 0.97 |
| RL          | Lymphoid | -5.24 | -0.66 | -4.21 | -4.25  | -2.63 | 0.81  | -2.84 | -4.68 | -4.08  | -2.67 | -1.97 | 0.61 | 0.89 | 1    | 0.91 | 1    | 1.03 |
| RPMI 8226   | Lymphoid | 3.89  | 2.97  | -9.55 | -1.17  | 2.87  | 4.18  | 3.84  | -0.47 | -8.12  | -1.80 | -1.48 | 0.94 | 0.93 | 0.97 | 0.79 | 0.85 | 0.59 |
| SC-1        | Lymphoid | -4.80 | -1.58 | -5.55 | -4.86  | -2.11 | -2.98 | -3.53 | -2.83 | -10.25 | 0.39  | -3.64 | 0.95 | 1.04 | 0.99 | 0.95 | 0.97 | 1.01 |

|            |          |       |       |       |        |       |       |       |       |        |       |       |      |      |      |      |      |      |
|------------|----------|-------|-------|-------|--------|-------|-------|-------|-------|--------|-------|-------|------|------|------|------|------|------|
| SCC-3      | Lymphoid | 4.47  | 3.24  | 4.61  | 1.68   | 3.41  | 3.28  | 3.72  | -5.53 | -0.02  | 2.66  | -0.74 | 0.99 | 1.02 | 1.04 | 0.91 | 0.98 | 0.91 |
| SET-2      | Lymphoid | -3.78 | 1.02  | 2.37  | -4.61  | 2.07  | 3.67  | 2.53  | -2.00 | -0.27  | -1.71 | -2.34 | 0.99 | 0.92 | 1.05 | 0.83 | 0.84 | 0.78 |
| SKM-1      | Lymphoid | -0.01 | 2.14  | 4.65  | 3.29   | 0.75  | 4.86  | 4.44  | -1.43 | -2.15  | -1.62 | -1.34 | 0.95 | 0.81 | 1    | 0.47 | 0.66 | 0.18 |
| SR         | Lymphoid | 3.25  | 3.51  | -4.31 | 2.22   | -2.88 | 2.40  | 3.11  | -4.92 | -5.87  | 0.51  | -1.37 | 0.89 | 0.91 | 0.93 | 0.85 | 0.9  | 0.84 |
| SU-DHL-1   | Lymphoid | -1.73 | 1.51  | -4.20 | 2.65   | -3.17 | 5.35  | 4.69  | -3.54 | -6.32  | -0.01 | -1.60 | 0.87 | 0.93 | 1.02 | 0.78 | 0.79 | 0.69 |
| SU-DHL-16  | Lymphoid | -4.18 | 4.34  | -4.38 | -2.49  | -1.47 | 1.98  | 3.01  | -2.51 | -3.41  | -1.96 | -0.92 | 0.56 | 0.68 | 1.01 | 0.74 | 1.06 | 0.89 |
| SU-DHL-4   | Lymphoid | -9.54 | -0.66 | -4.26 | -10.79 | -1.18 | -2.87 | -0.39 | -2.73 | -1.56  | -3.36 | -1.91 | 0.55 | 0.42 | 1.09 | 0.93 | 1.07 | 0.97 |
| SU-DHL-5   | Lymphoid | -9.54 | 1.42  | -4.33 | -0.20  | -1.73 | 1.26  | 3.57  | -4.24 | -10.25 | -0.86 | -1.39 | 0.51 | NaN  | 0.99 | 0.83 | 0.88 | 0.86 |
| SU-DHL-6   | Lymphoid | -4.80 | -1.86 | -4.99 | -3.48  | -1.32 | 0.79  | 1.84  | -3.36 | -10.25 | -1.23 | -1.92 | 0.56 | 0.41 | 1    | 0.82 | 0.94 | 0.86 |
| SU-DHL-8   | Lymphoid | -2.36 | 5.60  | -3.60 | -0.38  | -2.54 | 3.95  | 5.70  | -5.22 | -7.05  | -0.02 | -3.35 | 0.96 | 0.96 | 0.97 | 0.88 | 1.04 | 0.79 |
| SUP-B15    | Lymphoid | 0.01  | 6.81  | 5.72  | 1.02   | 0.20  | 0.53  | 5.35  | 1.04  | -2.02  | -1.46 | -1.30 | 0.93 | 0.98 | 0.98 | 0.7  | 0.72 | 0.58 |
| TMD8       | Lymphoid | -1.94 | -2.92 | -9.55 | -3.78  | -0.65 | 0.30  | 1.03  | -4.22 | 5.04   | 4.56  | -1.24 | 0.88 | 0.5  | 1.05 | 0.79 | 0.86 | 0.75 |
| U-698-M    | Lymphoid | -5.40 | -2.96 | -9.55 | -6.28  | -1.82 | -3.48 | -5.36 | -3.86 | -10.25 | -3.04 | -0.57 | 0.83 | 0.99 | 0.96 | 0.89 | 1.03 | 1.07 |
| U-937      | Lymphoid | 2.35  | 3.96  | 3.73  | 0.30   | -0.39 | 3.64  | 4.14  | -1.99 | -10.25 | -0.95 | -1.53 | 0.73 | 1.02 | 1.02 | 0.81 | 0.91 | 0.88 |
| UKE-1      | Lymphoid | 1.56  | 6.13  | 3.84  | -1.40  | 3.93  | 2.36  | 2.49  | 1.23  | -6.68  | -3.04 | -0.84 | 0.83 | 0.6  | 0.99 | 0.5  | 0.62 | 0.28 |
| WSU-DLCL2  | Lymphoid | -9.54 | 2.04  | -5.24 | -5.51  | -1.51 | -0.35 | -3.60 | -3.61 | -5.27  | -2.35 | -1.46 | 0.3  | 0.99 | 0.98 | 0.84 | 1.09 | 1.04 |
| WSU-FSCCL  | Lymphoid | -1.00 | 4.86  | 1.24  | -1.15  | -2.35 | 3.72  | 4.79  | -3.47 | -10.25 | -1.61 | -1.05 | 0.86 | 0.74 | 0.98 | 0.67 | 1.18 | 0.87 |
| DU 145     | Other    | 0.55  | 1.86  | 2.74  | 0.66   | 6.93  | 3.44  | 4.04  | 6.04  | -1.38  | 5.70  | -0.75 | 0.91 | 0.73 | 0.89 | 0.69 | 0.81 | 0.53 |
| NCI-H2052  | Other    | 0.32  | 3.93  | 3.36  | 3.27   | 8.38  | 0.79  | 3.31  | 6.12  | 2.64   | 5.67  | -0.40 | 0.93 | 0.93 | 0.94 | 0.86 | 1.04 | 0.93 |
| NCI-H28    | Other    | 2.02  | 1.46  | 3.09  | 0.99   | 7.23  | 0.40  | 2.14  | 5.50  | 1.37   | 4.89  | -0.55 | 0.9  | 0.89 | 0.98 | 0.92 | 0.95 | 0.91 |
| NTERA-2    | Other    | 1.29  | 5.67  | 5.05  | 4.67   | 7.20  | 6.63  | 5.26  | 5.25  | 1.87   | 5.08  | -0.07 | 0.78 | 0.69 | 0.89 | 0.93 | 0.81 | 0.75 |
| PC-3       | Other    | 6.04  | 4.83  | 3.87  | 5.15   | 8.28  | 5.95  | 4.26  | 7.31  | -0.23  | 6.32  | -0.29 | 0.82 | 0.75 | 0.94 | 0.93 | 0.95 | 0.92 |
| SU-DHL-10  | Other    | -1.82 | 0.84  | -6.38 | -4.86  | -2.53 | -1.10 | -2.82 | -4.41 | -0.14  | -2.96 | -1.74 | 0.62 | 0.89 | 1.21 | 0.93 | 0.9  | 0.75 |
| 59M        | Ovary    | 2.08  | 2.00  | 2.09  | 1.72   | 6.20  | 2.93  | 4.05  | 5.10  | -0.78  | 4.24  | -0.40 | 0.89 | 0.84 | 0.95 | 0.87 | 1.01 | 0.94 |
| A2780      | Ovary    | -5.62 | 5.70  | 6.83  | 4.30   | 5.91  | 4.47  | 4.62  | 3.55  | -4.89  | -1.14 | -0.65 | 0.81 | 0.86 | 0.92 | 0.71 | 0.8  | 0.56 |
| COV318     | Ovary    | 1.38  | 2.55  | 3.06  | 2.72   | 7.85  | 2.61  | 2.95  | 7.83  | -1.16  | 1.32  | -0.69 | 0.96 | 0.89 | 1    | 0.95 | 0.97 | 0.94 |
| COV362     | Ovary    | 4.33  | 3.73  | 3.71  | 3.78   | 8.81  | 4.65  | 4.75  | 7.52  | 2.19   | 5.04  | -0.29 | 0.97 | 0.9  | 0.95 | 0.8  | 0.89 | 0.77 |
| COV413A    | Ovary    | 3.47  | 5.56  | 5.32  | 4.65   | 8.08  | 6.19  | 4.23  | 5.97  | 0.51   | 3.52  | -0.25 | 0.81 | 0.75 | 0.94 | 0.65 | 0.76 | 0.52 |
| COV413B    | Ovary    | 2.35  | 3.75  | 4.04  | 2.65   | 6.73  | 4.26  | 3.63  | 5.72  | -3.33  | 5.20  | -0.61 | 0.93 | 0.81 | 1    | 0.84 | 0.84 | 0.72 |
| COV434     | Ovary    | -4.04 | 4.56  | 1.57  | 2.62   | 3.13  | 5.55  | 2.89  | 2.12  | -3.35  | -0.66 | -0.87 | 0.91 | 0.9  | 0.97 | 0.77 | 0.91 | 0.8  |
| COV504     | Ovary    | 4.24  | 3.94  | 4.33  | 3.72   | 6.97  | 5.19  | 5.52  | 7.03  | -0.97  | 5.79  | -0.36 | 0.93 | 0.88 | 1.02 | 0.86 | 0.89 | 0.79 |
| EFO-27     | Ovary    | 4.33  | 1.36  | 3.48  | 0.53   | 7.38  | 3.05  | 3.42  | 6.64  | 2.67   | 5.55  | -0.30 | 0.57 | 0.92 | 0.99 | 0.74 | 0.81 | 0.67 |
| ES-2       | Ovary    | 2.78  | 5.77  | 6.86  | 3.67   | 8.19  | 4.01  | 5.05  | 5.84  | 2.92   | 5.74  | -0.25 | 0.96 | 1    | 0.86 | 0.53 | 0.74 | 0.45 |
| HEY        | Ovary    | 0.74  | 4.48  | 5.12  | 4.42   | 7.80  | 4.73  | 4.79  | 5.73  | 0.84   | 5.57  | -0.35 | 0.89 | 0.9  | 0.9  | 0.63 | 0.68 | 0.47 |
| Hs 38.T    | Ovary    | 2.76  | 4.25  | 4.57  | 3.45   | 8.49  | 2.81  | 4.09  | 5.14  | 1.58   | 6.57  | -0.18 | 0.86 | 0.85 | 0.86 | 0.77 | 0.82 | 0.75 |
| IGROV-1    | Ovary    | 2.76  | 6.65  | 6.60  | 4.30   | 7.17  | 4.83  | 5.06  | 4.03  | 1.90   | 3.59  | -0.32 | 0.65 | 0.57 | 0.95 | 0.54 | 0.62 | 0.37 |
| KURAMOCHI  | Ovary    | -1.49 | 3.27  | 4.76  | 3.88   | 5.87  | 4.13  | 5.23  | 6.70  | -0.20  | 1.07  | -0.62 | 0.91 | 0.81 | 0.99 | 0.75 | 0.88 | 0.74 |
| MCAS       | Ovary    | 4.73  | 6.18  | 4.81  | 3.40   | 7.58  | 3.78  | 4.18  | 6.57  | 1.60   | 6.25  | -0.26 | 0.85 | 0.89 | 0.87 | 0.47 | 0.59 | 0.31 |
| NIH:OVCA-3 | Ovary    | 1.69  | 3.04  | 3.48  | 2.91   | 6.68  | 4.36  | 3.24  | 6.66  | 1.51   | 3.29  | -0.34 | 0.82 | 0.68 | 0.99 | 0.81 | 0.87 | 0.76 |
| OAW42      | Ovary    | -2.50 | 5.75  | 4.31  | 3.77   | 6.23  | 4.21  | 4.74  | 4.70  | -3.47  | 4.54  | -0.84 | 0.78 | 0.69 | 0.93 | 0.76 | 0.74 | 0.62 |
| ONCO-DG-1  | Ovary    | 1.26  | 2.52  | 2.86  | 1.71   | 7.16  | 3.86  | 2.47  | 6.78  | 1.50   | -1.20 | -0.57 | 0.75 | 0.64 | 0.91 | 0.79 | 0.81 | 0.74 |
| OV-90      | Ovary    | 4.60  | 6.03  | 6.33  | 4.51   | 4.87  | 5.63  | 4.55  | 4.87  | 3.73   | 4.74  | -0.27 | 0.85 | 0.94 | 0.93 | 0.5  | 0.7  | 0.38 |
| OV56       | Ovary    | 2.81  | 3.84  | 3.62  | 2.04   | 6.41  | 3.63  | 4.16  | 5.00  | 2.70   | 6.63  | -0.34 | 0.86 | 0.89 | 0.91 | 0.76 | 0.78 | 0.67 |
| OV7        | Ovary    | 4.38  | 4.79  | 3.53  | 4.04   | 7.35  | 3.45  | 4.35  | 6.27  | 2.19   | 6.01  | -0.37 | 0.95 | 0.86 | 0.99 | 0.84 | 0.87 | 0.74 |
| OVCA 420   | Ovary    | 4.51  | 5.28  | -0.31 | 0.96   | 6.32  | 3.50  | 2.95  | 5.64  | -6.80  | 4.05  | -0.73 | 0.81 | 0.86 | 0.93 | 0.68 | 0.8  | 0.63 |
| OvCA 429   | Ovary    | 3.94  | 2.12  | 3.27  | 0.79   | 7.53  | 2.59  | 2.72  | 6.09  | -0.05  | 4.27  | -0.54 | 0.89 | 0.84 | 0.89 | 0.54 | 0.76 | 0.51 |
| OvCA 432   | Ovary    | -1.49 | 4.97  | 3.88  | 4.69   | 8.02  | 6.32  | 4.07  | 5.50  | -0.55  | 1.29  | -0.50 | 0.86 | 0.84 | 0.93 | 0.97 | 0.96 | 0.96 |



|             |          |       |      |      |      |      |      |      |      |       |      |       |      |      |      |      |      |      |
|-------------|----------|-------|------|------|------|------|------|------|------|-------|------|-------|------|------|------|------|------|------|
| OVCAR-8     | Ovary    | -0.50 | 1.74 | 3.90 | 2.99 | 7.87 | 3.91 | 4.55 | 5.49 | 0.09  | 3.65 | -0.68 | 0.93 | 0.89 | 0.97 | 0.77 | 0.84 | 0.68 |
| OVCAR433    | Ovary    | 4.05  | 3.35 | 3.70 | 2.60 | 8.88 | 3.53 | 3.73 | 7.27 | -0.31 | 5.19 | -0.47 | 0.87 | 0.84 | 0.95 | 0.63 | 0.75 | 0.5  |
| OVISE       | Ovary    | 2.61  | 0.58 | 4.00 | 3.08 | 7.39 | 4.74 | 3.48 | 5.92 | 3.59  | 2.78 | -0.30 | 0.81 | 0.81 | 0.93 | 0.76 | 0.82 | 0.69 |
| OVSAGO      | Ovary    | -6.23 | 4.36 | 4.63 | 2.09 | 4.87 | 4.86 | 4.73 | 5.04 | -2.17 | 1.20 | -0.96 | 0.93 | 0.86 | 0.98 | 0.81 | 0.91 | 0.79 |
| OVTOKO      | Ovary    | 1.64  | 4.52 | 3.27 | 1.71 | 6.42 | 3.42 | 3.27 | 5.76 | 0.92  | 5.67 | -0.46 | 0.85 | 0.71 | 0.94 | 0.87 | 0.9  | 0.87 |
| PA-1        | Ovary    | -2.61 | 5.46 | 5.20 | 4.79 | 7.86 | 5.31 | 3.84 | 3.99 | 1.67  | 5.15 | -0.35 | 0.8  | 0.79 | 0.91 | 0.75 | 0.84 | 0.67 |
| PE01        | Ovary    | 5.18  | 3.59 | 1.95 | 1.78 | 8.11 | 6.00 | 3.92 | 5.35 | -0.31 | 4.26 | -0.48 | 0.91 | 0.94 | 0.95 | 0.76 | 0.78 | 0.63 |
| RKN         | Ovary    | 2.97  | 4.64 | 4.46 | 4.54 | 6.24 | 5.05 | 4.62 | 6.11 | -0.53 | 5.69 | -0.27 | 0.88 | 0.82 | 0.87 | 0.59 | 0.71 | 0.43 |
| RMG-I       | Ovary    | 2.67  | 3.47 | 5.06 | 2.03 | 5.88 | 4.81 | 3.42 | 5.89 | -3.00 | 1.79 | -0.59 | 0.87 | 0.83 | 0.92 | 0.68 | 0.83 | 0.58 |
| RMUG-S      | Ovary    | 4.77  | 3.07 | 2.30 | 0.17 | 5.91 | 1.35 | 2.71 | 4.65 | 1.21  | 4.69 | -0.55 | 0.87 | 0.82 | 0.98 | 0.67 | 0.75 | 0.59 |
| SK-OV-3     | Ovary    | 2.14  | 3.68 | 3.11 | 2.54 | 6.18 | 3.02 | 3.37 | 5.91 | 1.07  | 6.25 | -0.42 | 0.82 | 0.78 | 0.92 | 0.9  | 0.84 | 0.82 |
| TOV-112D    | Ovary    | -3.34 | 7.15 | 1.82 | 1.62 | 6.11 | 5.75 | 4.09 | 3.15 | -1.90 | 1.50 | -0.80 | 0.91 | 0.94 | 0.96 | 0.79 | 0.88 | 0.78 |
| TYK-nu      | Ovary    | -1.01 | 7.76 | 6.86 | 6.03 | 6.29 | 4.97 | 4.56 | 5.95 | -3.49 | 6.82 | -0.40 | 0.88 | 1    | 0.98 | 0.66 | 0.71 | 0.48 |
| TYK-nu.CP-r | Ovary    | -0.63 | 7.11 | 5.76 | 5.68 | 7.02 | 4.65 | 4.73 | 5.64 | -4.14 | 5.60 | -0.50 | 0.84 | 0.94 | 0.97 | 0.55 | 0.67 | 0.47 |
| AsPC-1      | Pancreas | 5.35  | 6.75 | 5.65 | 4.88 | 6.29 | 5.07 | 4.37 | 6.30 | -1.75 | 6.58 | -0.35 | 0.78 | 0.84 | 1.02 | 0.61 | 0.69 | 0.5  |
| BxPC-3      | Pancreas | 5.37  | 5.95 | 3.97 | 1.89 | 6.25 | 3.66 | 2.20 | 6.85 | 0.54  | 6.30 | -0.41 | 0.87 | 0.86 | 0.96 | 0.74 | 0.79 | 0.71 |
| Capan-1     | Pancreas | 4.33  | 5.21 | 3.16 | 3.25 | 7.09 | 5.95 | 4.81 | 6.79 | 2.03  | 6.36 | -0.20 | 1.02 | 0.94 | 1.06 | 0.79 | 0.91 | 0.79 |
| Capan-2     | Pancreas | 4.03  | 3.24 | 3.71 | 2.99 | 8.50 | 3.66 | 3.80 | 7.02 | -1.19 | 5.81 | -0.64 | 0.97 | 0.83 | 0.97 | 0.61 | 0.65 | 0.42 |
| CFPAC-1     | Pancreas | 4.47  | 5.04 | 3.93 | 3.94 | 6.99 | 4.56 | 4.01 | 6.96 | 1.50  | 5.15 | -0.39 | 0.91 | 0.83 | 0.94 | 0.71 | 0.75 | 0.6  |
| DAN-G       | Pancreas | 5.05  | 6.20 | 4.53 | 3.88 | 7.51 | 5.49 | 2.68 | 6.41 | 1.69  | 6.01 | -0.26 | 0.84 | 0.81 | 0.95 | 0.82 | 0.82 | 0.68 |
| HPAC        | Pancreas | 4.55  | 6.62 | 4.45 | 3.48 | 8.59 | 4.13 | 3.28 | 7.66 | 3.92  | 6.87 | -0.17 | 0.92 | 0.85 | 0.92 | 0.54 | 0.62 | 0.4  |
| HPAF-II     | Pancreas | 4.17  | 8.00 | 2.88 | 5.52 | 7.70 | 4.47 | 2.54 | 7.09 | 0.73  | 7.51 | -0.30 | 0.88 | 0.86 | 0.98 | 0.55 | 0.63 | 0.42 |
| Hs 766T     | Pancreas | 7.15  | 6.37 | 5.89 | 4.35 | 6.37 | 4.35 | 4.96 | 7.99 | 1.24  | 4.95 | -0.22 | 0.8  | 0.83 | 0.96 | 0.51 | 0.64 | 0.33 |
| HUP-T3      | Pancreas | 3.32  | 2.31 | 4.14 | 3.62 | 7.60 | 4.59 | 3.58 | 7.11 | -1.86 | 5.27 | -0.44 | 0.93 | 0.9  | 0.89 | 0.67 | 0.76 | 0.52 |
| HUP-T4      | Pancreas | 3.68  | 3.97 | 3.20 | 1.36 | 8.11 | 3.74 | 0.97 | 7.63 | 1.38  | 4.75 | -0.46 | 0.88 | 0.79 | 0.95 | 0.6  | 0.72 | 0.45 |
| KCI-MOH1    | Pancreas | 4.84  | 5.55 | 4.10 | 2.70 | 8.76 | 3.72 | 3.25 | 7.16 | 3.13  | 6.25 | -0.29 | NaN  | 0.79 | 0.94 | 0.56 | 0.73 | 0.49 |
| KLM-1       | Pancreas | 3.62  | 4.28 | 2.36 | 2.95 | 6.29 | 4.92 | 4.08 | 5.99 | 0.56  | 5.07 | -0.52 | 0.86 | 0.89 | 0.96 | 0.78 | 0.84 | 0.61 |
| KP-3        | Pancreas | 4.36  | 3.53 | 5.09 | 2.28 | 6.46 | 2.35 | 4.44 | 7.06 | 2.12  | 6.44 | -0.29 | 0.97 | 0.86 | 0.92 | 0.81 | 0.85 | 0.72 |
| KP-3L       | Pancreas | 6.32  | 5.57 | 4.42 | 4.04 | 7.29 | 6.00 | 4.96 | 7.45 | 1.48  | 6.45 | -0.03 | 0.87 | 0.83 | 0.92 | 0.62 | 0.7  | 0.53 |
| KP4         | Pancreas | 0.03  | 5.36 | 4.58 | 5.02 | 6.64 | 5.17 | 4.94 | 5.59 | -1.20 | 6.64 | -0.40 | 0.81 | 0.96 | 0.95 | 0.7  | 0.73 | 0.62 |
| MIA Paca-2  | Pancreas | -4.09 | 1.60 | 6.45 | 5.98 | 5.60 | 4.59 | 5.16 | 5.92 | 4.96  | 6.11 | -0.61 | 0.89 | 0.89 | 0.97 | 0.58 | 0.72 | 0.41 |
| PA-TU-8902  | Pancreas | 6.05  | 4.16 | 4.35 | 4.18 | 7.04 | 6.06 | 4.66 | 6.73 | -7.41 | 6.02 | -0.31 | 0.81 | 0.86 | 1    | 0.64 | 0.7  | 0.44 |
| PA-TU-8988S | Pancreas | 2.15  | 5.22 | 4.64 | 3.34 | 6.13 | 5.46 | 4.68 | 5.29 | 2.58  | 3.98 | -0.49 | 0.96 | 0.87 | 0.99 | 0.67 | 0.7  | 0.55 |
| PA-TU-8988T | Pancreas | 3.76  | 4.77 | 3.73 | 2.55 | 6.90 | 4.20 | 5.30 | 6.61 | -2.48 | 4.34 | -0.42 | 0.91 | 0.82 | 0.93 | 0.71 | 0.81 | 0.63 |
| Panc 02.03  | Pancreas | 3.93  | 4.61 | 2.24 | 2.00 | 7.36 | 4.25 | 4.37 | 7.16 | -1.35 | 6.77 | -0.33 | 0.87 | 0.74 | 0.98 | 0.45 | 0.57 | 0.22 |
| Panc 03.27  | Pancreas | 4.70  | 5.19 | 4.97 | 3.99 | 7.65 | 4.83 | 4.62 | 6.59 | 1.10  | 5.41 | -0.26 | 0.84 | 0.83 | 0.91 | 0.66 | 0.68 | 0.51 |
| Panc 04.03  | Pancreas | 4.78  | 4.97 | 2.40 | 1.88 | 8.02 | 4.72 | 3.87 | 7.05 | 0.16  | 6.68 | -0.48 | 0.88 | 0.78 | 0.95 | 0.6  | 0.72 | 0.47 |
| Panc 05.04  | Pancreas | 5.87  | 5.93 | 4.88 | 3.42 | 7.99 | 4.13 | 1.50 | 6.44 | 2.98  | 5.42 | -0.25 | 0.87 | 0.74 | 0.97 | 0.56 | 0.71 | 0.4  |
| PANC-1      | Pancreas | -5.28 | 2.69 | 3.49 | 3.53 | 6.43 | 2.57 | 4.53 | 7.10 | -1.87 | 6.28 | -0.71 | 0.96 | 0.92 | 1    | 0.79 | 0.85 | 0.69 |
| PK-45H      | Pancreas | 4.54  | 3.16 | 4.92 | 2.37 | 7.35 | 4.06 | 4.39 | 5.64 | 2.05  | 4.80 | -0.54 | 0.85 | 0.78 | 1    | 0.51 | 0.64 | 0.36 |
| PK-45P      | Pancreas | 5.31  | 4.64 | 5.20 | 2.31 | 6.74 | 4.83 | 4.89 | 5.94 | -4.47 | 5.99 | -0.56 | 0.84 | 0.83 | 1    | 0.63 | 0.75 | 0.47 |
| PK-59       | Pancreas | 6.39  | 5.17 | 3.13 | 4.55 | 6.73 | 5.63 | 2.88 | 7.01 | 2.40  | 6.17 | -0.27 | 1    | 0.82 | 0.93 | 0.68 | 0.74 | 0.56 |
| PK-8        | Pancreas | 2.91  | 4.89 | 2.81 | 2.82 | 7.03 | 3.80 | 2.39 | 5.99 | 1.69  | 6.49 | -0.60 | 0.9  | 0.84 | 0.94 | 0.59 | 0.72 | 0.4  |
| PSN1        | Pancreas | 4.97  | 7.14 | 4.39 | 5.09 | 6.79 | 4.99 | 5.43 | 4.14 | 2.92  | 6.78 | -0.29 | 0.88 | 0.85 | 0.96 | 0.42 | 0.61 | 0.22 |
| QGP-1       | Pancreas | 5.47  | 6.34 | 4.53 | 5.68 | 5.58 | 5.87 | 4.17 | 0.74 | 3.08  | 4.76 | -0.53 | 0.99 | 0.94 | 0.93 | 0.76 | 0.83 | 0.69 |
| SU.86.86    | Pancreas | 5.79  | 6.73 | 4.07 | 3.23 | 7.09 | 5.51 | 5.19 | 7.18 | 0.29  | 6.51 | -0.02 | 0.97 | 0.95 | 0.88 | 0.72 | 0.79 | 0.68 |

|            |             |       |       |       |       |       |       |       |       |        |       |       |      |      |      |      |      |      |
|------------|-------------|-------|-------|-------|-------|-------|-------|-------|-------|--------|-------|-------|------|------|------|------|------|------|
| SUIT-2     | Pancreas    | 2.77  | 4.38  | 3.18  | 3.56  | 6.12  | 4.23  | 4.39  | 6.69  | 1.46   | 4.83  | -0.44 | 0.96 | 0.87 | 1.02 | 0.58 | 0.65 | 0.35 |
| SW 1990    | Pancreas    | 6.27  | 4.86  | 5.91  | 4.10  | 7.05  | 4.90  | 4.56  | 6.37  | -0.14  | 5.62  | -0.40 | 0.89 | 0.93 | 0.92 | 0.71 | 0.75 | 0.55 |
| TCC-PAN2   | Pancreas    | 4.72  | 5.30  | 5.46  | 5.08  | 7.72  | 3.72  | 4.18  | 7.48  | 1.68   | 6.81  | -0.25 | 0.9  | 0.81 | 1.08 | 0.67 | 0.8  | 0.53 |
| YAPC       | Pancreas    | 5.62  | 6.38  | 5.43  | 4.02  | 8.09  | 6.30  | 4.12  | 6.58  | 2.66   | 6.71  | -0.18 | 0.92 | 0.84 | 0.92 | 0.78 | 0.79 | 0.69 |
| 105KC      | Sarcomatoid | 1.42  | 0.39  | 4.11  | 2.33  | 5.08  | 3.66  | 4.19  | 5.34  | 0.18   | 6.57  | -0.63 | 0.94 | 0.89 | 0.92 | 0.87 | 0.95 | 0.86 |
| 143B       | Sarcomatoid | 2.12  | 5.45  | 2.85  | 4.25  | 7.90  | 5.16  | 4.73  | 5.96  | 0.79   | 4.37  | -0.48 | 0.93 | 0.95 | 0.95 | 0.66 | 0.69 | 0.49 |
| MG-63      | Sarcomatoid | -5.16 | 3.92  | 2.92  | 3.73  | 6.26  | 1.79  | 5.15  | 5.26  | 1.09   | 3.76  | -0.52 | NaN  | NaN  | 0.93 | 0.84 | 0.9  | 0.84 |
| MHH-ES-1   | Sarcomatoid | -4.03 | 5.68  | 0.79  | 0.12  | 9.01  | -2.44 | -0.44 | 4.21  | 2.51   | -0.66 | -0.89 | 0.92 | 0.82 | 0.94 | 0.94 | 0.99 | 0.95 |
| SICRH30    | Sarcomatoid | -0.82 | 4.62  | 5.71  | 3.71  | 5.17  | 4.98  | 4.44  | 5.48  | 0.22   | 2.46  | -0.42 | 0.74 | 0.76 | 0.97 | 0.91 | 0.93 | 0.86 |
| TC-71      | Sarcomatoid | -4.31 | 3.11  | 2.03  | -1.22 | 8.22  | -3.22 | 4.07  | 2.81  | 2.20   | -0.54 | -0.86 | 0.87 | 0.63 | 0.94 | 0.83 | 0.92 | 0.77 |
| U-2 OS     | Sarcomatoid | -5.20 | -2.27 | 1.72  | -0.82 | 6.49  | 5.56  | 3.97  | 6.08  | -0.75  | 1.98  | -0.78 | 0.87 | 0.75 | 1.02 | 0.7  | 0.75 | 0.57 |
| 501A       | Skin        | 4.07  | 5.69  | 3.57  | 3.95  | 7.08  | 6.17  | 6.10  | 2.71  | 2.69   | 4.65  | -0.32 | 0.9  | 0.83 | 0.76 | 0.46 | 0.71 | 0.33 |
| 537 MEL    | Skin        | 6.27  | 5.07  | 5.84  | 5.47  | 8.41  | 4.14  | 5.53  | 2.49  | -7.17  | 6.42  | -0.44 | 0.68 | 0.83 | 0.92 | 0.43 | 0.7  | 0.31 |
| 624 mel    | Skin        | 4.94  | 5.39  | 4.49  | 3.68  | 8.85  | 6.01  | 7.14  | 1.53  | 2.09   | 5.02  | -0.29 | 0.86 | 0.89 | 0.74 | 0.45 | 0.66 | 0.39 |
| 928 mel    | Skin        | 5.95  | 6.07  | 4.77  | 3.90  | 8.13  | 5.77  | 6.44  | 1.80  | 5.01   | 5.93  | -0.17 | 0.92 | 0.86 | 0.76 | 0.4  | 0.66 | 0.3  |
| A-375      | Skin        | 5.32  | 6.12  | 6.52  | 4.80  | 7.40  | 6.08  | 4.81  | 6.69  | 1.74   | 6.33  | -0.10 | 0.91 | 0.93 | 0.63 | 0.29 | 0.59 | 0.15 |
| A-431      | Skin        | 2.01  | 4.05  | -1.03 | 1.25  | 8.72  | 3.58  | 0.56  | 6.37  | -0.08  | 5.52  | -0.62 | 0.85 | 0.93 | 0.97 | 0.72 | 0.79 | 0.57 |
| A2058      | Skin        | 5.50  | 5.65  | 5.82  | 3.32  | 6.54  | 5.87  | 5.09  | 4.72  | 3.20   | 5.64  | -0.25 | 0.86 | 0.9  | 0.86 | 0.52 | 0.67 | 0.4  |
| C32        | Skin        | 4.64  | 6.42  | 6.70  | 6.65  | 8.20  | 6.28  | 5.77  | 2.49  | -7.45  | 6.58  | -0.23 | 0.88 | 0.88 | 0.7  | 0.34 | 0.59 | 0.13 |
| C32TG      | Skin        | 5.07  | 5.81  | 5.77  | 5.48  | 8.12  | 5.37  | 5.22  | 5.84  | -0.53  | 6.68  | -0.09 | 0.8  | 0.87 | 0.71 | 0.39 | 0.69 | 0.29 |
| CHL-1      | Skin        | 0.91  | 4.79  | 5.33  | 1.90  | 7.17  | 4.56  | 5.56  | 5.04  | -7.87  | 1.64  | -0.74 | 0.91 | 0.98 | 0.91 | 0.74 | 0.79 | 0.71 |
| COLO 679   | Skin        | 7.37  | 7.83  | 5.99  | 6.43  | 7.51  | 5.84  | 6.47  | 2.24  | 2.71   | 7.66  | -0.12 | 0.96 | 0.86 | 0.71 | 0.37 | 0.7  | 0.33 |
| COLO 794   | Skin        | 5.52  | 6.01  | 6.00  | 4.78  | 7.94  | 5.82  | 6.08  | 5.91  | -1.18  | 6.40  | -0.19 | 0.81 | 0.85 | 0.69 | 0.35 | 0.68 | 0.23 |
| COLO 800   | Skin        | 6.39  | 5.69  | 6.33  | 6.00  | 7.79  | 5.23  | 6.99  | 4.02  | -3.44  | 6.65  | -0.15 | 0.86 | 0.89 | 0.73 | 0.32 | 0.67 | 0.19 |
| COLO 829   | Skin        | 6.58  | 6.84  | 6.64  | 6.22  | 6.86  | 6.67  | 6.32  | 2.30  | -1.30  | 7.03  | -0.18 | 0.87 | 0.87 | 0.71 | 0.39 | 0.68 | 0.28 |
| COLO 849   | Skin        | 6.74  | 6.37  | 5.65  | 6.33  | 6.54  | 6.09  | 7.02  | 1.97  | -1.56  | 6.65  | -0.25 | 0.9  | 0.93 | 0.74 | 0.46 | 0.72 | 0.33 |
| COLO 853   | Skin        | 6.69  | 6.56  | 6.18  | 5.55  | 8.82  | 6.41  | 6.26  | 4.51  | -0.70  | 8.10  | -0.01 | 0.8  | 0.95 | 0.72 | 0.41 | 0.66 | 0.31 |
| COLO 857   | Skin        | 5.63  | 6.56  | 6.60  | 6.92  | 8.71  | 6.02  | 6.47  | 5.04  | -2.76  | 7.59  | -0.05 | 0.83 | 0.94 | 0.68 | 0.38 | 0.66 | 0.29 |
| DEOC-1     | Skin        | 4.66  | 5.86  | 6.55  | 4.62  | 7.10  | 5.33  | 6.21  | 4.92  | -3.78  | 7.00  | -0.08 | 0.92 | 0.91 | 1.08 | 0.61 | 0.76 | 0.37 |
| G-361      | Skin        | 6.54  | 5.06  | 4.50  | 4.23  | 5.52  | 6.18  | 5.10  | 2.31  | 3.28   | 5.71  | -0.30 | 0.83 | 0.84 | 0.69 | 0.29 | 0.63 | 0.16 |
| GR-M       | Skin        | 5.04  | 6.63  | 3.89  | 5.68  | 6.26  | 5.08  | 4.78  | 6.08  | 2.03   | 7.14  | -0.17 | 0.86 | 0.9  | 0.87 | 0.45 | 0.65 | 0.23 |
| HMY-1      | Skin        | 6.10  | 4.58  | 5.81  | 4.38  | 7.57  | 5.46  | 5.63  | 3.15  | 0.24   | 5.58  | -0.25 | 0.91 | 0.84 | 0.67 | 0.38 | 0.7  | 0.3  |
| Hs 294T    | Skin        | 5.38  | 5.15  | 6.32  | 3.83  | 6.98  | 4.92  | 4.84  | 5.71  | 1.16   | 6.69  | -0.29 | 0.85 | 0.89 | 0.77 | 0.46 | 0.72 | 0.47 |
| Hs 852.T   | Skin        | 4.33  | 6.04  | 6.80  | 2.86  | 10.44 | 3.20  | 4.00  | 4.84  | 1.06   | 6.14  | -0.60 | 0.87 | 0.8  | 0.98 | 0.59 | 0.69 | 0.44 |
| IGR-37     | Skin        | 6.62  | 3.91  | 5.31  | 3.76  | 6.56  | 5.65  | 5.67  | 1.55  | 1.49   | 5.03  | -0.32 | 0.89 | 0.87 | 0.74 | 0.39 | 0.67 | 0.27 |
| IPC-298    | Skin        | 6.36  | 6.21  | 5.91  | 5.83  | 6.52  | 5.81  | 6.09  | 3.00  | -5.03  | 6.37  | -0.35 | 0.93 | 0.82 | 0.87 | 0.38 | 0.58 | 0.09 |
| LOX-IMVI   | Skin        | -9.54 | 4.79  | 4.37  | 3.14  | 6.69  | 4.58  | 4.73  | 4.88  | -0.38  | 6.52  | -0.58 | 1.17 | NaN  | 0.94 | 0.63 | 0.68 | 0.52 |
| MDA-MB-435 | Skin        | 5.24  | 4.07  | 6.36  | 3.96  | 7.02  | 5.70  | 6.39  | 4.51  | -2.78  | 5.98  | -0.28 | 0.91 | 0.85 | 0.85 | 0.74 | 0.91 | 0.75 |
| MEL-HO     | Skin        | 7.01  | 5.52  | 4.61  | 3.98  | 8.61  | 6.25  | 7.10  | 3.42  | 1.94   | 6.62  | -0.16 | 0.83 | 0.84 | 0.75 | 0.36 | 0.65 | 0.26 |
| MeWo       | Skin        | 6.06  | 4.97  | 4.33  | 2.78  | 6.20  | 4.49  | 5.04  | 1.95  | 1.29   | 6.09  | -0.38 | 0.91 | 0.82 | 0.9  | 0.55 | 0.68 | 0.42 |
| RPMI-7951  | Skin        | 5.49  | 4.42  | 4.73  | 4.09  | 6.86  | 5.38  | 5.14  | 6.08  | 0.91   | 5.96  | -0.22 | 0.88 | 0.94 | 0.86 | 0.62 | 0.77 | 0.52 |
| SK-MEL-1   | Skin        | 6.25  | 5.65  | 5.90  | 7.33  | 9.24  | 7.17  | 7.43  | 5.09  | -10.25 | 8.04  | -0.24 | 0.96 | 0.96 | 0.84 | 0.41 | 0.64 | 0.18 |
| SK-MEL-2   | Skin        | 6.26  | 6.54  | 5.48  | 5.80  | 8.42  | 6.76  | 6.43  | 4.92  | 1.65   | 5.56  | -0.06 | 1.1  | 1.18 | 1.02 | 0.57 | 0.59 | 0.55 |
| SK-MEL-24  | Skin        | 5.86  | 6.38  | 6.03  | 6.14  | 7.51  | 4.92  | 6.11  | 6.51  | 1.98   | 7.12  | -0.03 | 0.87 | 0.85 | 0.62 | 0.24 | 0.64 | 0.17 |
| SK-MEL-28  | Skin        | 6.38  | 5.33  | 5.72  | 4.79  | 8.21  | 5.19  | 6.83  | -0.94 | 2.35   | 5.52  | -0.18 | 0.89 | 0.8  | 0.68 | 0.34 | 0.66 | 0.26 |
| SK-MEL-3   | Skin        | 6.05  | 4.55  | 5.41  | 4.29  | 5.16  | 4.29  | 5.74  | 3.59  | 2.57   | 6.21  | -0.29 | 0.92 | 0.82 | 0.75 | 0.59 | 0.73 | 0.49 |
| SK-MEL-30  | Skin        | 5.65  | 5.93  | 5.34  | 4.70  | 7.32  | 6.14  | 6.68  | 1.60  | 0.60   | 5.70  | -0.20 | 0.89 | 0.93 | 0.93 | 0.37 | 0.62 | 0.16 |

|             |         |       |       |       |       |       |       |      |       |        |       |       |      |      |      |      |      |      |
|-------------|---------|-------|-------|-------|-------|-------|-------|------|-------|--------|-------|-------|------|------|------|------|------|------|
| SK23        | Skin    | 6.68  | 4.35  | 5.81  | 4.00  | 7.17  | 5.78  | 5.44 | 3.17  | -10.25 | 6.18  | -0.49 | 0.87 | 1.02 | 0.83 | 0.31 | 0.65 | 0.24 |
| UCSD-242I   | Skin    | 6.15  | 6.08  | 5.96  | 5.16  | 7.52  | 6.29  | 6.00 | 4.08  | -0.58  | 6.66  | -0.12 | 0.82 | 0.79 | 0.69 | 0.47 | 0.74 | 0.38 |
| WM-115      | Skin    | 6.17  | 6.43  | 6.01  | 7.51  | 8.47  | 5.30  | 5.50 | 6.69  | 1.18   | 6.80  | 0.06  | 0.87 | 0.83 | 0.89 | 0.74 | 0.89 | 0.7  |
| WM-266-4    | Skin    | 6.62  | 5.98  | 6.45  | 6.92  | 8.63  | 6.31  | 5.92 | 2.26  | -5.81  | 6.31  | -0.25 | 0.8  | 0.79 | 0.69 | 0.22 | 0.61 | 0.13 |
| 23132/87    | Stomach | 2.79  | 4.31  | 3.07  | 1.35  | 6.65  | 5.09  | 0.18 | 5.72  | -4.05  | 6.73  | -0.76 | 0.81 | 0.83 | 0.98 | 0.84 | 0.84 | 0.76 |
| AGS         | Stomach | 5.62  | 5.76  | 3.41  | 3.95  | 7.90  | 4.87  | 5.53 | 6.90  | 3.87   | 5.20  | -0.10 | 0.77 | 0.82 | 0.91 | 0.6  | 0.74 | 0.48 |
| FU97        | Stomach | -5.48 | 3.58  | -0.96 | 3.52  | 7.12  | 5.44  | 4.87 | 5.03  | -6.63  | 2.60  | -1.26 | 0.81 | 0.82 | 0.96 | 0.73 | 0.84 | 0.77 |
| GTL-16      | Stomach | 2.97  | 4.81  | 2.99  | 2.51  | 6.29  | 6.01  | 5.77 | 5.53  | -1.08  | 6.93  | -0.68 | 0.83 | 0.8  | 1.02 | 0.57 | 0.64 | 0.34 |
| HGC-27      | Stomach | -2.99 | -4.00 | 0.83  | -4.91 | 6.20  | -0.55 | 0.07 | 3.78  | 0.40   | -0.55 | -1.68 | 0.54 | 0.58 | 0.93 | 0.84 | 0.88 | 0.91 |
| Hs 746T     | Stomach | -2.72 | 5.15  | 5.75  | 4.23  | 7.93  | 3.14  | 5.38 | 6.60  | -0.22  | 7.07  | -0.47 | 0.83 | 0.8  | 0.97 | 0.71 | 0.72 | 0.61 |
| KATO III    | Stomach | 6.27  | 5.54  | 3.08  | 2.55  | 6.96  | 4.81  | 4.80 | 6.66  | 0.09   | 4.95  | -0.36 | 0.81 | 0.87 | 1.03 | 0.81 | 0.82 | 0.71 |
| MKN-1       | Stomach | 2.81  | 3.61  | 2.52  | 2.14  | 7.21  | 4.52  | 3.92 | 6.21  | 3.19   | 4.15  | -0.42 | 0.81 | 0.78 | 0.95 | 0.79 | 0.83 | 0.73 |
| MKN-45      | Stomach | 4.16  | 5.46  | 5.18  | 3.46  | 6.49  | 5.38  | 5.69 | 5.20  | -0.66  | 6.91  | -0.56 | 0.82 | 0.84 | 0.94 | 0.64 | 0.69 | 0.44 |
| MKN-74      | Stomach | 3.54  | 4.38  | 1.97  | 5.58  | 7.73  | 5.76  | 4.62 | 8.66  | 2.42   | 7.12  | -0.02 | 0.93 | 0.9  | 0.94 | 0.66 | 0.74 | 0.56 |
| NCI-N87     | Stomach | -0.89 | 5.44  | 1.90  | 3.07  | 6.87  | 3.62  | 2.91 | 5.23  | 0.99   | 5.36  | -0.46 | 0.85 | 0.76 | 1.02 | 0.84 | 0.82 | 0.77 |
| NUGC-3      | Stomach | 5.18  | 6.00  | 2.02  | 3.37  | 8.75  | 4.62  | 3.70 | 7.23  | -0.44  | 5.71  | -0.48 | 0.86 | 0.87 | 0.91 | 0.65 | 0.8  | 0.5  |
| NUGC-4      | Stomach | 1.95  | 3.86  | 2.44  | 1.54  | 6.14  | 4.58  | 2.61 | 3.91  | -5.03  | 2.78  | -0.77 | 0.91 | 0.92 | 1.06 | 0.71 | 0.76 | 0.63 |
| OCUM-1      | Stomach | 6.45  | 6.71  | 6.98  | 4.93  | 7.34  | 3.45  | 2.65 | 6.76  | -3.20  | 7.54  | -0.25 | 0.84 | 0.89 | 1.04 | 0.33 | 0.48 | 0.15 |
| RERF-GC-1B  | Stomach | 0.64  | 3.18  | 4.01  | 1.44  | 5.99  | 4.40  | 3.01 | 4.32  | 0.21   | 1.38  | -0.98 | 0.9  | 0.87 | 1.01 | 0.64 | 0.74 | 0.52 |
| SNU-16      | Stomach | 3.28  | 4.71  | 3.64  | 2.39  | 6.70  | 4.21  | 1.05 | 4.44  | -2.26  | 1.94  | -0.70 | 0.9  | 0.93 | 0.93 | 0.82 | 0.82 | 0.77 |
| SNU-216     | Stomach | 3.38  | -0.02 | 2.18  | -2.12 | 7.00  | 1.57  | 0.80 | 6.10  | 1.18   | 4.69  | -1.39 | 0.71 | 0.61 | 0.9  | 0.61 | 0.77 | 0.58 |
| SNU-484     | Stomach | -2.91 | 7.79  | 5.82  | 3.45  | 4.03  | 5.63  | 5.30 | 5.06  | -2.68  | -0.61 | -1.17 | 0.9  | 0.86 | 0.99 | 0.81 | 0.85 | 0.7  |
| SNU-601     | Stomach | 5.30  | 4.98  | 3.74  | 3.11  | 7.24  | 5.22  | 4.32 | 6.83  | 1.83   | 5.20  | -0.68 | 0.79 | 0.67 | 0.97 | 0.68 | 0.64 | 0.43 |
| SNU-620     | Stomach | 5.93  | 4.49  | 3.06  | 2.92  | 4.81  | 5.44  | 5.62 | 4.86  | -7.62  | 4.43  | -0.77 | 0.85 | 0.94 | 1.08 | 0.5  | 0.6  | 0.14 |
| SNU-638     | Stomach | 6.41  | 6.62  | 4.83  | 4.12  | 7.53  | 4.67  | 4.94 | 4.37  | 1.88   | 7.94  | -0.25 | 0.84 | 0.86 | 1.01 | 0.73 | 0.78 | 0.61 |
| SNU-668     | Stomach | 5.56  | 6.39  | 3.96  | 3.33  | 7.07  | 4.06  | 3.31 | 5.36  | 2.40   | 4.27  | -0.72 | 0.89 | 0.84 | 0.98 | 0.64 | 0.77 | 0.59 |
| SNU-719     | Stomach | 3.98  | 7.01  | 4.28  | 3.93  | 6.44  | 6.26  | 3.17 | 6.98  | -1.86  | 6.56  | -0.51 | 0.98 | 0.94 | 0.99 | 0.59 | 0.56 | 0.36 |
| A-673       | Unknown | 1.06  | 5.76  | 2.81  | 2.92  | 9.72  | 3.90  | 4.30 | 5.17  | 1.44   | 1.40  | -0.60 | 0.98 | 0.82 | 0.91 | 0.85 | 0.9  | 0.78 |
| BHY         | Unknown | 4.62  | 5.49  | 3.07  | 2.60  | 6.64  | 3.85  | 1.18 | 5.88  | -1.75  | 6.33  | -0.51 | 0.86 | 0.89 | 0.93 | 0.74 | 0.85 | 0.75 |
| BICR 10     | Unknown | 3.78  | 3.05  | 3.37  | 2.54  | 6.82  | 4.02  | 4.33 | 5.94  | -0.07  | 5.62  | -0.39 | 0.66 | 0.69 | 0.95 | 0.8  | 0.83 | 0.74 |
| Detroit 562 | Unknown | 2.57  | 2.83  | 2.44  | 0.05  | 8.06  | 3.95  | 1.93 | 6.27  | -1.61  | 4.63  | -0.63 | 0.69 | 0.8  | 0.9  | 0.63 | 0.77 | 0.55 |
| FaDu        | Unknown | 0.41  | 2.27  | 0.98  | -0.30 | 7.79  | 2.76  | 1.37 | 5.94  | -1.47  | 2.26  | -1.31 | 0.9  | 0.87 | 0.98 | 0.71 | 0.83 | 0.61 |
| HN          | Unknown | 1.79  | 4.24  | 3.47  | 2.26  | 5.67  | 3.75  | 2.05 | 5.39  | -2.51  | 5.49  | -0.75 | 0.85 | 0.83 | 0.97 | 0.68 | 0.78 | 0.58 |
| SW 780      | Unknown | 4.47  | 3.03  | 1.74  | 1.13  | 7.37  | 2.64  | 2.00 | 7.06  | 0.08   | 5.40  | -0.92 | 0.91 | 0.77 | 0.99 | 0.72 | 0.78 | 0.62 |
| U266B1      | Unknown | 0.23  | 2.61  | -3.05 | -4.41 | 8.35  | 2.76  | 3.12 | -4.34 | -5.19  | -2.46 | -1.02 | 0.92 | 0.89 | 1    | 0.8  | 0.86 | 0.69 |
| RT-112      | Bladder | 2.93  | 5.45  | 2.39  | 0.35  | 6.28  | 4.77  | 2.54 | 6.15  | 2.94   | 6.29  | -0.43 | 0.83 | 0.75 | 0.97 | 0.62 | 0.71 | 0.44 |
| RT4         | Bladder | 2.71  | 5.36  | 2.59  | 4.28  | 7.24  | 3.36  | 2.47 | 4.75  | 0.83   | 6.07  | -0.59 | 1.01 | 0.93 | 1.06 | 0.76 | 0.89 | 0.83 |
| UM-UC-1     | Bladder | 2.26  | 5.17  | 2.97  | 1.67  | 7.54  | 4.38  | 2.32 | 5.79  | 2.60   | 6.37  | -0.39 | 0.68 | 0.71 | 0.99 | 0.63 | 0.66 | 0.43 |
| UM-UC-3     | Bladder | 4.47  | 2.68  | 3.46  | 3.88  | 7.85  | 3.99  | 4.64 | 6.40  | -2.25  | 6.15  | -0.44 | 0.81 | 0.83 | 1.03 | 0.71 | 0.8  | 0.57 |
| AN3 CA      | Uterus  | 0.73  | 7.56  | 7.12  | 6.20  | -0.13 | 6.34  | 5.23 | 3.58  | -7.64  | 3.98  | -0.74 | 0.74 | 0.74 | 0.98 | 0.77 | 0.93 | 0.84 |
| HCC1482     | Uterus  | 4.34  | 5.15  | 5.64  | 5.55  | 5.78  | 4.32  | 5.84 | 3.68  | 4.21   | 6.81  | -0.12 | 0.71 | 0.75 | 0.93 | 0.84 | 0.92 | 0.84 |
| HEC-1-A     | Uterus  | -2.99 | 6.37  | 5.72  | 4.35  | 6.49  | 5.52  | 5.30 | 6.55  | 0.05   | 3.07  | -0.38 | 0.83 | 0.8  | 0.95 | 0.72 | 0.76 | 0.65 |
| KLE         | Uterus  | 2.69  | 4.48  | 3.42  | 3.90  | 5.49  | 4.67  | 3.98 | 7.43  | 1.27   | 1.91  | -0.39 | 0.95 | 0.8  | 1.03 | 0.87 | 0.95 | 0.85 |

Supplementary Table 2: MAPK gene expression, MPAS and cell viability in response to multiple MAPK inhibitors across cell lines from multiple indications

### Supplementary Table 3

| cell line indication | Mean Viability (STD) |         |         |             |           |         |             |
|----------------------|----------------------|---------|---------|-------------|-----------|---------|-------------|
|                      | MPAS (STD)           | GDC0068 | GDC0941 | Cobimetinib | PD0325901 | GDC0623 | Vemurafenib |
|                      |                      | (AKT)   | (PI3K)  | (MEK)       | (MEK)     | (MEK)   | (BRAF)      |
| Breast               | 0.454                | 0.110   | 0.082   | 0.101       | 0.153     | 0.108   | 0.041       |
| Lung                 | 0.478                | 0.083   | 0.075   | 0.138       | 0.199     | 0.121   | 0.043       |
| Colorectal           | 0.254                | 0.078   | 0.078   | 0.160       | 0.195     | 0.116   | 0.100       |
| Pancreatic           | 0.162                | 0.060   | 0.055   | 0.102       | 0.140     | 0.078   | 0.043       |
| Melanoma             | 0.174                | 0.078   | 0.074   | 0.139       | 0.164     | 0.071   | 0.115       |

**Supplementary Table 3: Standard deviations of either MPAS or actual mean viability across cell lines treated with either MAPK or PI3K/AKT inhibitors.**

## Supplementary Table 4

| Cobimetinib | Gene name | chromosome location       | shortlist coefficient |
|-------------|-----------|---------------------------|-----------------------|
|             | THG1L     | chr5:157158323-157166772  | -0.0148               |
|             | LINC00460 | chr13:107028911-107030140 | -0.0114               |
|             | TIMP1     | chrX:47441690-47446190    | -0.00705              |
|             | FERMT1    | chr20:6055492-6104191     | -0.00589              |
|             | *PHLDA1   | chr12:76419227-76425556   | -0.00343              |
|             | S100A4    | chr1:153516095-153518282  | -0.00237              |
|             | PLEK2     | chr14:67853700-67878828   | -0.000503             |
| Trametinib  | Gene name | chromosome location       | shortlist coefficient |
|             | THG1L     | chr5:157158323-157166772  | -0.025143138          |
|             | *PHLDA1   | chr12:76419227-76425556   | -0.018512537          |
|             | PLEK2     | chr14:67853700-67878828   | -0.012443006          |
|             | TIMP1     | chrX:47441690-47446190    | -0.00995946           |
|             | LINC00460 | chr13:107028911-107030140 | -0.009487112          |
|             | FERMT1    | chr20:6055492-6104191     | -0.004975383          |
|             | S100A4    | chr1:153516095-153518282  | -0.003213673          |

**Supplementary Table 4: Short-list of gene clusters identified by the E-Net model as being predictive of MAPK inhibitor (cobimetinib and trametinib) sensitivity. \*PHLDA group also included SPRY2, SPRY4, DUSP6, CCND1 and EPHA2**

## Supplementary Table 5

| Gene                 | Correlation coefficient |
|----------------------|-------------------------|
| <b><i>PHLDA1</i></b> | 1                       |
| FOSL1                | 0.687                   |
| <b><i>EPHA2</i></b>  | 0.651                   |
| PXN                  | 0.633                   |
| PHLDA2               | 0.63                    |
| <b><i>CCND1</i></b>  | 0.62                    |
| CD97                 | 0.617                   |
| ADORA2B              | 0.611                   |
| IER3                 | 0.611                   |
| ITGA2                | 0.61                    |
| S100A11              | 0.61                    |
| LOC100216001         | 0.609                   |
| LOC100294307         | 0.605                   |
| SPATS2L              | 0.605                   |
| LOC100653318         | 0.605                   |
| LOC100652851         | 0.604                   |
| C1orf170             | 0.603                   |
| PLAUR                | 0.592                   |
| ANXA2                | 0.59                    |
| LOC100506484         | 0.589                   |
| <b><i>SPRY4</i></b>  | 0.586                   |
| YAP1                 | 0.585                   |
| TIMP1                | 0.584                   |
| ZFP36L1              | 0.584                   |
| SPRED1               | 0.581                   |
| AHNAK                | 0.58                    |
| DNMBP                | 0.58                    |
| RHOC                 | 0.579                   |
| PLEKHN1              | 0.578                   |
| <b><i>DUSP6</i></b>  | 0.577                   |
| DCBLD2               | 0.574                   |
| LIF                  | 0.572                   |
| RPSAP52              | 0.57                    |

|              |       |
|--------------|-------|
| TNFRSF12A    | 0.569 |
| FXYD5        | 0.568 |
| TGFBR2       | 0.567 |
| NT5E         | 0.567 |
| FHL2         | 0.566 |
| ANXA1        | 0.565 |
| STEAP1       | 0.563 |
| HRH1         | 0.561 |
| TRIP10       | 0.556 |
| CMTM7        | 0.555 |
| CLIC1        | 0.554 |
| RIN1         | 0.554 |
| ELK3         | 0.554 |
| LOC100506377 | 0.553 |
| <b>SPRY2</b> | 0.553 |
| SP100        | 0.552 |
| CDCP1        | 0.549 |
| RALB         | 0.549 |
| MYOF         | 0.549 |
| CSF2         | 0.548 |
| SMAGP        | 0.548 |
| TNFRSF10B    | 0.547 |
| SMAD3        | 0.545 |
| LOC541471    | 0.544 |
| TMSB10       | 0.544 |
| LOC100653218 | 0.544 |
| EMP1         | 0.544 |
| CNN2         | 0.544 |
| LOC100287314 | 0.544 |
| TMBIM1       | 0.541 |
| LOC100506649 | 0.54  |
| S100A16      | 0.54  |
| NPAS2        | 0.539 |
| LOC100129940 | 0.538 |

|              |       |
|--------------|-------|
| LMNA         | 0.538 |
| S100A10      | 0.537 |
| CAPN2        | 0.537 |
| ADAMTSL5     | 0.536 |
| AREGB        | 0.535 |
| SH3TC2       | 0.535 |
| ERRFI1       | 0.532 |
| LINC00460    | 0.53  |
| TUBA1C       | 0.529 |
| ITGA3        | 0.528 |
| PLAU         | 0.527 |
| TM4SF1       | 0.526 |
| MIR221       | 0.526 |
| MIR614       | 0.525 |
| CD9          | 0.524 |
| MYEOV        | 0.522 |
| RNF149       | 0.521 |
| CIB1         | 0.521 |
| LOC100652804 | 0.52  |
| LOC100653288 | 0.52  |
| HMGA2        | 0.519 |
| CTSB         | 0.518 |
| S100A6       | 0.517 |
| GPRC5A       | 0.517 |
| RUNX1        | 0.517 |
| CAV2         | 0.516 |
| GSTO1        | 0.516 |
| PTPN12       | 0.515 |
| CATSPER1     | 0.515 |
| LOC100508196 | 0.514 |
| SERTAD1      | 0.513 |
| ITGA6        | 0.513 |
| C10orf55     | 0.511 |
| CASP8        | 0.511 |



|           |       |
|-----------|-------|
| F2RL1     | 0.511 |
| ITGB5     | 0.51  |
| PLIN3     | 0.51  |
| BAG3      | 0.51  |
| EHBP1L1   | 0.509 |
| IRAK2     | 0.508 |
| LOC389602 | 0.508 |
| SOX9      | 0.507 |
| REST      | 0.507 |
| ANXA2P2   | 0.506 |
| SFXN3     | 0.506 |
| SLC16A3   | 0.505 |
| VPS37B    | 0.505 |
| AREG      | 0.504 |
| EPHB4     | 0.503 |
| LRRC8E    | 0.503 |
| ARL14     | 0.503 |
| FERMT1    | 0.502 |
| IGF2BP2   | 0.502 |
| ANXA2P1   | 0.502 |
| RPS6KA4   | 0.502 |

**Supplementary Table 5: Genes with expression that correlates with the PHLDA1 gene cluster identified by the E-Net model.**

\*Genes in larger bold italic font are known MAPK target genes and are included in MPAS

Supplementary Table 6

| Cell line | Individual MAPK gene expression (nanostring counts) |       |       |       |       |       |       |       |       |        | MPAS   | predicted (E-Net) |             | actual mean viability |             | actual GI50  |             | KRAS-mut |
|-----------|-----------------------------------------------------|-------|-------|-------|-------|-------|-------|-------|-------|--------|--------|-------------------|-------------|-----------------------|-------------|--------------|-------------|----------|
|           | DUSP4                                               | DUSP6 | SPRY2 | SPRY4 | CCND1 | ETV4  | ETV5  | EPHA2 | EPHA4 | PHLDA1 |        | cobi-metinib      | tra-metinib | cobi-metinib          | tra-metinib | cobi-metinib | tra-metinib |          |
| A-427     | -0.32                                               | 5.71  | 5.34  | 3.85  | 7.27  | 6.19  | 5.61  | 4.72  | -4.68 | 7.33   | -0.411 | 0.77              | 0.68        | 0.47                  | 0.27        | 0.04         | 0.0002      | 1        |
| Calu-1    | 2.06                                                | 3.29  | 3.93  | 3.57  | 8.21  | 4.00  | 4.20  | 6.79  | 1.98  | 5.79   | -0.414 | 0.73              | 0.63        | 0.82                  | 0.27        | 0.05         | 0.05        | 1        |
| Calu-6    | 6.09                                                | 7.72  | 6.89  | 6.63  | 7.32  | 5.66  | 6.31  | 4.51  | 3.90  | 6.91   | -0.015 | 0.64              | 0.51        | 0.61                  | 0.44        | 0.2          | 0.0003      | 1        |
| COLO 699  | 4.07                                                | 3.91  | 3.07  | -0.55 | 6.41  | 0.37  | 2.50  | 3.65  | 2.00  | 4.95   | -0.624 | 0.80              | 0.77        | 0.87                  | 0.9         | 10           | 10          | 0        |
| EBC-1     | 2.05                                                | 5.88  | 3.82  | 2.23  | 6.51  | 4.46  | 4.47  | 6.11  | -6.35 | 7.68   | -0.323 | 0.69              | 0.55        | 0.45                  | 0.16        | 0.2          | 0.001       | 0        |
| HCC193    | 2.77                                                | 3.19  | 3.00  | 0.39  | 7.35  | 3.51  | 3.90  | 5.59  | 0.01  | 5.71   | -0.598 | 0.76              | 0.66        | 0.95                  | 0.82        | 7            | 10          | 0        |
| HCC2270   | 3.53                                                | 4.07  | 4.07  | 2.12  | 8.37  | 3.03  | 2.15  | 7.37  | 2.42  | 5.19   | -0.602 | 0.77              | 0.68        | 0.82                  | 0.83        | 10           | 10          | 0        |
| HCC2935   | 4.15                                                | 6.38  | 4.38  | 3.10  | 8.98  | 4.94  | 4.14  | 5.69  | 3.44  | 4.62   | -0.485 | 0.77              | 0.73        | 0.82                  | 0.77        | 0.4          | 0.001       | 0        |
| HCC366    | 4.52                                                | 5.14  | 5.17  | 3.95  | 7.72  | 4.99  | 5.11  | 7.38  | -1.37 | 6.39   | -0.288 | 0.72              | 0.62        | 0.91                  | 0.95        | 10           | 10          | 0        |
| LOU-NH91  | 2.22                                                | 0.62  | 1.87  | 0.84  | 5.51  | 1.68  | 2.68  | 6.38  | 3.19  | 4.98   | -0.817 | 0.75              | 0.69        | 0.89                  | 0.84        | 0.5          | 10          | 0        |
| NCI-H1373 | 4.38                                                | 6.67  | 5.06  | 3.45  | 7.08  | 4.03  | 4.77  | 6.86  | -1.44 | 7.08   | -0.309 | 0.71              | 0.61        | 0.77                  | 0.67        | 0.74         | 0.033       | 1        |
| NCI-H1395 | 4.56                                                | 2.14  | 2.87  | 2.49  | 7.91  | 1.66  | 1.77  | 2.02  | -0.40 | 2.94   | -0.589 | 0.79              | 0.76        | 0.92                  | 0.77        | 0.75         | 0.03        | 0        |
| NCI-H1435 | 3.87                                                | 6.49  | 3.27  | 3.39  | 7.07  | 6.30  | 2.67  | 6.26  | -5.92 | 4.91   | -0.554 | 0.67              | 0.61        | 0.83                  | 0.93        | 0.09         | 10          | 0        |
| NCI-H1568 | 5.12                                                | 1.43  | 1.80  | -2.30 | 4.49  | 0.17  | 0.81  | 2.91  | -2.20 | 2.80   | -1.457 | 0.80              | 0.77        | 1.02                  | 0.85        | 10           | 10          | 0        |
| NCI-H1623 | 6.07                                                | 1.52  | 4.95  | 0.92  | 6.88  | 4.60  | 3.14  | 4.73  | 3.10  | 4.69   | -0.474 | 0.82              | 0.79        | 0.92                  | 0.5         | 0.5          | 0.001       | 0        |
| NCI-H1648 | 2.98                                                | 4.89  | 3.49  | 2.86  | 7.00  | 5.24  | 3.24  | 7.30  | 0.04  | 5.55   | -0.372 | 0.74              | 0.65        | 0.53                  | 0.55        | 0.39         | 0.002       | 0        |
| NCI-H1650 | 1.09                                                | -0.13 | 2.60  | 0.81  | 5.83  | 1.43  | 2.23  | 6.18  | -0.02 | 3.94   | -0.673 | 0.78              | 0.70        | 1.02                  | 0.9         | 10           | 10          | 0        |
| NCI-H1693 | 1.48                                                | 4.76  | 3.59  | 3.30  | 7.46  | 1.07  | 3.53  | 5.91  | -1.48 | 4.14   | -0.617 | 0.76              | 0.70        | 0.67                  | 0.75        | 0.14         | 0.1         | 0        |
| NCI-H1734 | 5.09                                                | 6.90  | 4.29  | 2.18  | 6.28  | 5.23  | 4.63  | 5.46  | 1.81  | 4.40   | -0.489 | 0.79              | 0.75        | 0.66                  | 0.71        | 0.13         | 0.1         | 1        |
| NCI-H1770 | -2.31                                               | -4.08 | -3.28 | -2.11 | -2.10 | -1.42 | -1.36 | 3.61  | -0.98 | 1.33   | -2.580 | 0.90              | 0.87        | 1.16                  | 0.98        | 10           | 10          | 0        |
| NCI-H1781 | 3.67                                                | 6.20  | 4.30  | 3.96  | 5.53  | 5.81  | 3.83  | 5.68  | 2.21  | 3.91   | -0.739 | 0.83              | 0.80        | 1.00                  | 0.73        | 0.4          | 0.08        | 0        |
| NCI-H1792 | 3.31                                                | 4.19  | 4.48  | 2.28  | 6.43  | 5.10  | 3.95  | 4.85  | 1.12  | 5.70   | -0.637 | 0.72              | 0.59        | 0.79                  | 0.29        | 0.5          | 0.0001      | 1        |
| NCI-H1793 | 3.84                                                | 0.97  | 2.77  | -0.10 | 6.67  | 1.75  | 3.88  | 3.96  | -1.43 | 2.28   | -0.812 | 0.77              | 0.69        | 0.86                  | 0.81        | 10           | 10          | 0        |
| NCI-H1915 | -0.23                                               | 4.90  | 4.37  | 4.11  | 7.49  | 4.58  | 4.50  | 5.80  | 3.08  | 6.83   | -0.197 | 0.74              | 0.62        | 0.80                  | 0.19        | 0.21         | 0.0001      | 0        |
| NCI-H1975 | 3.27                                                | 2.87  | 2.54  | 2.18  | 7.24  | 3.10  | 3.07  | 5.47  | 1.09  | 5.01   | -0.562 | 0.69              | 0.58        | 0.82                  | 0.78        | 0.14         | 0.001       | 0        |
| NCI-H2030 | 4.25                                                | 3.14  | 3.82  | 3.66  | 5.42  | 4.11  | 4.42  | 5.62  | -4.26 | 5.13   | -0.652 | 0.77              | 0.67        | 0.70                  | 0.6         | 0.34         | 0.002       | 1        |
| NCI-H2073 | 7.28                                                | 4.73  | 3.23  | 4.62  | 3.71  | 3.55  | 3.92  | 7.18  | -3.75 | 6.11   | -0.624 | 0.73              | 0.63        | 0.75                  | 0.62        | 0.32         | 0.001       | 0        |
| NCI-H2126 | 4.94                                                | 3.56  | 3.76  | 1.64  | 7.34  | 3.90  | 1.40  | 6.27  | 0.29  | 5.55   | -0.555 | 0.71              | 0.62        | 0.72                  | 0.73        | 0.8          | 10          | 0        |
| NCI-H2172 | 3.09                                                | -2.30 | 2.50  | 0.32  | 3.17  | 2.59  | 2.19  | 3.45  | -2.35 | 3.05   | -0.666 | 0.81              | 0.78        | 0.97                  | 0.76        | 10           | 1           | 0        |
| NCI-H2596 | 0.26                                                | 1.76  | 1.92  | 1.65  | 7.09  | 2.81  | 2.83  | 6.23  | 2.79  | 3.60   | -0.565 | 0.79              | 0.75        | 0.86                  | 0.8         | 2.1          | 8.8         | 0        |
| NCI-H2795 | 3.95                                                | 1.52  | 4.33  | 2.18  | 6.39  | 4.66  | 3.58  | 5.46  | 4.64  | 4.97   | -0.287 | 0.78              | 0.73        | 0.53                  | 0.35        | 0.1          | 0.001       | 0        |
| NCI-H596  | 2.07                                                | 2.17  | 1.79  | 1.30  | 5.47  | 0.31  | 3.04  | 5.11  | 2.40  | 3.75   | -1.258 | 0.80              | 0.76        | 1.00                  | 0.84        | 10           | 10          | 0        |
| NCI-H810  | 0.04                                                | 0.65  | 2.24  | -1.58 | -1.18 | 3.48  | 2.42  | -1.61 | 5.21  | 0.44   | -0.783 | 0.88              | 0.86        | 0.93                  | 0.89        | 10           | 10          | 0        |
| NCI-H820  | 0.62                                                | 5.22  | 3.16  | 2.18  | 6.83  | 3.61  | 3.83  | 6.50  | -0.75 | 5.11   | -0.381 | 0.74              | 0.63        | 0.76                  | 0.64        | 0.16         | 0.06        | 0        |
| NCI-H920  | 3.49                                                | 5.18  | 1.83  | 1.71  | 7.35  | 3.45  | 2.61  | 5.73  | -1.31 | 5.67   | -0.578 | 0.77              | 0.67        | 0.97                  | 0.81        | 0.32         | 0.001       | 0        |
| SW 900    | 3.58                                                | 7.17  | 5.25  | 4.30  | 7.93  | 3.94  | 4.30  | 6.16  | 2.93  | 7.41   | -0.519 | 0.77              | 0.69        | 0.72                  | 0.57        | 0.67         | 0.02        | 1        |

Supplementary Table 6: Gene expression, KRAS mutation status and predicted/actual mean viabilities to both trametinib and cobimetinib for cell lines in NSCLC validation set

## Supplementary Table 7

| Study            | Figure ID | Median | Max  | Min   |
|------------------|-----------|--------|------|-------|
| COBRIM           | 3         | 0.08   | 1.33 | -2.26 |
| mCRC             | 4B        | -0.13  | 4.09 | -1.90 |
| AVANT            | 4C        | 1.10   | 2.96 | -1.27 |
| TCGA (Adrenal)   | 5A        | -0.62  | 2.55 | -4.69 |
| METABRIC (HER2+) | 5Civ      | 0.14   | 4.51 | -4.47 |

Supplementary Table 7: Median, maximum and minimum MPAS values for each clinical study.

## Supplementary Table 8

|                 | Vendor                                                                                 |
|-----------------|----------------------------------------------------------------------------------------|
| Melanoma (n=50) | Folio Biosciences, LLC<br>Asterand Bioscience<br>ProteoGenex Inc.<br>The MT group Inc. |
| CRC (n=50)      | The MT group Inc.<br>Tristar Technology ventures                                       |
| Lung (n=100)    | Tristar Technology ventures<br>The MT group Inc.<br>Cureline, Inc<br>ClinPath advisors |

Supplementary Table 8: List of vendors from which melanoma, crc and lung patient samples were procured.

## Supplementary Table 9

| Gene name | Role on panel |
|-----------|---------------|
| DUSP6     | MAPK target   |
| SPRY2     | MAPK target   |
| CCND1     | MAPK target   |
| DUSP4     | MAPK target   |
| SPRY4     | MAPK target   |
| ETV4      | MAPK target   |
| ETV5      | MAPK target   |
| EPHA2     | MAPK target   |
| EPHA4     | MAPK target   |
| PHLDA1    | MAPK target   |
| CLTC      | HK genes      |
| GUSB      | HK genes      |
| HPRT1     | HK genes      |
| PGK1      | HK genes      |
| SDHA      | HK genes      |

Supplementary Table 9: Genes included in the custom MAPK-specific nanostring panel.

**Supplementary Table 10**

| Cell line name | primary tissue | predicted values of mean viability |            | actual mean viability |            |
|----------------|----------------|------------------------------------|------------|-----------------------|------------|
|                |                | cobimetinib                        | trametinib | cobimetinib           | trametinib |
| LS-174T        | Colon          | 0.673                              | 0.533      | 0.691                 | 0.545      |
| SW 48          | Colon          | 0.650                              | 0.535      | 0.615                 | 0.421      |
| OUMS-23        | Colon          | 0.780                              | 0.748      | 0.826                 | 0.862      |
| COLO 201       | Colon          | 0.527                              | 0.407      | 0.279                 | 0.172      |
| COLO 320       | Colon          | 0.854                              | 0.849      | 0.934                 | 1.000      |
| DLD-1          | Colon          | 0.706                              | 0.587      | 0.801                 | 0.682      |
| CL-34          | Colon          | 0.636                              | 0.520      | 0.623                 | 0.532      |
| SW 1463        | Colon          | 0.642                              | 0.527      | 0.633                 | 0.510      |
| LS-174T        | Colon          | 0.672                              | 0.535      | 0.593                 | 0.429      |
| SW 480         | Colon          | 0.664                              | 0.543      | 0.626                 | 0.490      |
| SK-CO-1        | Colon          | 0.626                              | 0.496      | 0.492                 | 0.325      |
| DLD-1          | Colon          | 0.665                              | 0.558      | 0.750                 | 0.608      |
| RKO            | Colon          | 0.614                              | 0.514      | 0.479                 | 0.442      |
| COLO 741       | Colon          | 0.764                              | 0.690      | 0.671                 | 0.536      |
| Caco-2         | Colon          | 0.779                              | 0.675      | 0.865                 | 0.748      |
| LS-174T        | Colon          | 0.670                              | 0.537      | 0.754                 | 0.557      |
| HCT 116        | Colon          | 0.677                              | 0.530      | 0.892                 | 0.836      |
| HT-29          | Colon          | 0.605                              | 0.504      | 0.374                 | 0.305      |
| LoVo           | Colon          | 0.670                              | 0.522      | 0.613                 | 0.441      |
| COLO 201       | Colon          | 0.556                              | 0.462      | 0.360                 | 0.302      |
| HCA-7          | Colon          | 0.709                              | 0.592      | 0.694                 | 0.465      |
| CL-11          | Colon          | 0.646                              | 0.480      | 0.528                 | 0.372      |
| SW 620         | Colon          | 0.643                              | 0.525      | 0.627                 | 0.424      |
| KM-12          | Colon          | 0.667                              | 0.547      | 0.859                 | 0.802      |
| HT-55          | Colon          | 0.691                              | 0.572      | 0.636                 | 0.573      |
| HT-29          | Colon          | 0.617                              | 0.508      | 0.384                 | 0.244      |
| T84            | Colon          | 0.655                              | 0.506      | 0.745                 | 0.560      |
| SW 403         | Colon          | 0.639                              | 0.530      | 0.685                 | 0.519      |
| SW 948         | Colon          | 0.641                              | 0.501      | 0.651                 | 0.556      |
| C170           | Colon          | 0.661                              | 0.529      | 0.623                 | 0.460      |
| COLO 678       | Colon          | 0.699                              | 0.606      | 0.726                 | 0.647      |
| CX-1           | Colon          | 0.597                              | 0.453      | 0.509                 | 0.293      |
| MDST8          | Colon          | 0.675                              | 0.591      | 0.723                 | 0.642      |
| Caco-2         | Colon          | 0.777                              | 0.683      | 0.770                 | 0.696      |
| COLO 320       | Colon          | 0.869                              | 0.854      | 0.962                 | 1.001      |
| HCC1263        | Colon          | 0.710                              | 0.627      | 0.746                 | 0.651      |
| SNU-C1         | Colon          | 0.720                              | 0.618      | 0.729                 | 0.593      |
| RKO            | Colon          | 0.644                              | 0.532      | 0.569                 | 0.450      |
| HCT 116        | Colon          | 0.666                              | 0.523      | 0.512                 | 0.277      |
| HT-115         | Colon          | 0.714                              | 0.576      | 0.678                 | 0.557      |
| GP2d           | Colon          | 0.736                              | 0.658      | 0.731                 | 0.623      |
| CaR-1          | Colon          | 0.709                              | 0.608      | 0.736                 | 0.675      |
| CW-2           | Colon          | 0.718                              | 0.621      | 0.845                 | 0.784      |
| RCM-1          | Colon          | 0.651                              | 0.532      | 0.732                 | 0.575      |
| NCI-H358       | Lung           | 0.716                              | 0.606      | 0.665                 | 0.491      |
| NCI-H292       | Lung           | 0.734                              | 0.654      | 0.503                 | 0.354      |
| NCI-H522       | Lung           | 0.825                              | 0.812      | 0.823                 | 0.854      |
| NCI-H650       | Lung           | 0.664                              | 0.543      | 0.742                 | 0.603      |
| NCI-H23        | Lung           | 0.728                              | 0.643      | 0.563                 | 0.388      |
| NCI-H520       | Lung           | 0.814                              | 0.747      | 0.861                 | 0.792      |
| NCI-H647       | Lung           | 0.752                              | 0.682      | 1.021                 | 0.962      |
| NCI-H1437      | Lung           | 0.697                              | 0.601      | 0.529                 | 0.389      |
| HCC827         | Lung           | 0.728                              | 0.604      | 0.713                 | 0.567      |
| ABC-1          | Lung           | 0.781                              | 0.716      | 0.842                 | 0.764      |
| RERF-LC-KJ     | Lung           | 0.757                              | 0.684      | 0.770                 | 0.748      |
| Calu-3         | Lung           | 0.724                              | 0.619      | 0.806                 | 0.772      |
| NCI-H460       | Lung           | 0.713                              | 0.611      | 0.719                 | 0.629      |
| NCI-H1299      | Lung           | 0.759                              | 0.654      | 0.655                 | 0.553      |
| NCI-H226       | Lung           | 0.755                              | 0.701      | 0.756                 | 0.689      |
| NCI-H1944      | Lung           | 0.741                              | 0.656      | 0.722                 | 0.614      |
| NCI-H2106      | Lung           | 0.892                              | 0.892      | 0.991                 | 0.994      |

|            |      |       |       |       |       |
|------------|------|-------|-------|-------|-------|
| SW 1573    | Lung | 0.718 | 0.609 | 0.813 | 0.740 |
| SK-MES-1   | Lung | 0.702 | 0.601 | 0.682 | 0.526 |
| HCC-15     | Lung | 0.671 | 0.548 | 0.597 | 0.494 |
| NCI-H2122  | Lung | 0.696 | 0.570 | 0.636 | 0.439 |
| NCI-H441   | Lung | 0.734 | 0.625 | 0.793 | 0.727 |
| A549       | Lung | 0.688 | 0.573 | 0.541 | 0.400 |
| NCI-H1703  | Lung | 0.765 | 0.740 | 0.866 | 0.935 |
| NCI-H1666  | Lung | 0.662 | 0.548 | 0.637 | 0.559 |
| NCI-H82    | Lung | 0.908 | 0.919 | 0.944 | 1.037 |
| LXFL529    | Lung | 0.829 | 0.756 | 0.863 | 0.730 |
| NCI-H2171  | Lung | 0.911 | 0.908 | 0.948 | 0.997 |
| NCI-N417   | Lung | 0.887 | 0.860 | 1.025 | 1.010 |
| NCI-H2405  | Lung | 0.743 | 0.670 | 0.360 | 0.296 |
| NCI-H661   | Lung | 0.754 | 0.684 | 0.753 | 0.728 |
| NCI-H1155  | Lung | 0.844 | 0.827 | 1.013 | 1.029 |
| RERF-LC-MS | Lung | 0.710 | 0.616 | 0.658 | 0.534 |
| HOP-62     | Lung | 0.704 | 0.618 | 0.761 | 0.658 |
| NCI-H1838  | Lung | 0.737 | 0.646 | 0.856 | 0.860 |
| NCI-H2009  | Lung | 0.724 | 0.619 | 0.575 | 0.472 |
| VMRC-LCD   | Lung | 0.849 | 0.821 | 0.892 | 0.943 |
| H322T      | Lung | 0.775 | 0.677 | 0.724 | 0.610 |
| RERF-LC-OK | Lung | 0.739 | 0.674 | 0.835 | 0.759 |
| NCI-H727   | Lung | 0.681 | 0.594 | 0.479 | 0.331 |
| NCI-H1651  | Lung | 0.818 | 0.766 | 0.890 | 0.837 |
| KNS-62     | Lung | 0.710 | 0.588 | 0.644 | 0.488 |
| HOP-92     | Lung | 0.701 | 0.590 | 0.633 | 0.450 |
| NCI-H446   | Lung | 0.855 | 0.834 | 0.873 | 0.783 |
| NCI-H322T  | Lung | 0.737 | 0.609 | 0.759 | 0.583 |
| HCC4006    | Lung | 0.747 | 0.655 | 0.783 | 0.653 |
| SU-DHL-10  | Lung | 0.787 | 0.704 | 0.925 | 0.848 |
| NCI-H1355  | Lung | 0.727 | 0.641 | 0.739 | 0.740 |
| NCI-H187   | Lung | 0.921 | 0.938 | 1.032 | 1.030 |
| NCI-H196   | Lung | 0.817 | 0.757 | 0.916 | 0.842 |
| NCI-H2170  | Lung | 0.822 | 0.804 | 1.054 | 1.106 |
| NCI-H146   | Lung | 0.899 | 0.907 | 0.913 | 0.934 |
| NCI-H889   | Lung | 0.881 | 0.886 | 0.926 | 0.956 |
| ChaGo-K-1  | Lung | 0.818 | 0.796 | 0.917 | 0.938 |
| NCI-H2110  | Lung | 0.740 | 0.649 | 0.892 | 0.823 |
| HCC515     | Lung | 0.684 | 0.555 | 0.698 | 0.618 |
| HCC1171    | Lung | 0.734 | 0.634 | 0.680 | 0.575 |
| HCC4017    | Lung | 0.708 | 0.578 | 0.714 | 0.604 |
| NCI-H2228  | Lung | 0.716 | 0.611 | 0.842 | 0.726 |
| DV-90      | Lung | 0.693 | 0.595 | 0.621 | 0.513 |
| HCC44      | Lung | 0.686 | 0.569 | 0.607 | 0.421 |
| HCC78      | Lung | 0.734 | 0.646 | 0.794 | 0.748 |
| LCLC-103H  | Lung | 0.776 | 0.726 | 0.829 | 0.955 |
| BEN        | Lung | 0.832 | 0.773 | 0.917 | 0.849 |
| CAL-12T    | Lung | 0.677 | 0.550 | 0.628 | 0.548 |
| EPLC-272H  | Lung | 0.744 | 0.658 | 0.783 | 0.726 |
| LCLC-97TM1 | Lung | 0.688 | 0.557 | 0.702 | 0.488 |
| LXF-289    | Lung | 0.752 | 0.643 | 0.687 | 0.576 |
| SCLC-21H   | Lung | 0.917 | 0.925 | 0.912 | 0.985 |
| SCLC-22H   | Lung | 0.874 | 0.873 | 0.926 | 0.972 |
| NCI-H1339  | Lung | 0.754 | 0.678 | 0.814 | 0.703 |
| NCI-H1930  | Lung | 0.942 | 0.968 | 1.081 | 1.137 |
| NCI-H23    | Lung | 0.757 | 0.663 | 0.778 | 0.645 |
| HCC2885    | Lung | 0.763 | 0.666 | 0.834 | 0.740 |
| UMC-11     | Lung | 0.851 | 0.873 | 0.882 | 0.937 |
| COR-L26    | Lung | 0.739 | 0.646 | 0.753 | 0.602 |
| COR-L279   | Lung | 0.882 | 0.869 | 0.979 | 1.019 |
| COR-L47    | Lung | 0.901 | 0.916 | 1.003 | 1.028 |
| COR-L88    | Lung | 0.894 | 0.903 | 0.915 | 0.925 |
| MOR        | Lung | 0.751 | 0.690 | 0.876 | 0.837 |

|             |          |       |       |       |       |
|-------------|----------|-------|-------|-------|-------|
| HCC2279     | Lung     | 0.755 | 0.675 | 0.842 | 0.817 |
| NCI-H1581   | Lung     | 0.814 | 0.810 | 0.740 | 0.681 |
| NCI-H1869   | Lung     | 0.741 | 0.656 | 0.751 | 0.701 |
| NCI-H2023   | Lung     | 0.759 | 0.674 | 0.742 | 0.698 |
| NCI-H2135   | Lung     | 0.680 | 0.513 | 0.588 | 0.308 |
| NCI-H2347   | Lung     | 0.699 | 0.556 | 0.627 | 0.463 |
| HCC364      | Lung     | 0.658 | 0.500 | 0.380 | 0.146 |
| HCC4011     | Lung     | 0.764 | 0.659 | 0.836 | 0.757 |
| HCC2302     | Lung     | 0.764 | 0.699 | 0.796 | 0.740 |
| DMS 273     | Lung     | 0.840 | 0.820 | 0.904 | 0.990 |
| HCC4019     | Lung     | 0.749 | 0.677 | 0.755 | 0.659 |
| HCC1534     | Lung     | 0.797 | 0.732 | 0.882 | 0.780 |
| NCI-H2461   | Lung     | 0.776 | 0.725 | 0.780 | 0.699 |
| NCI-H2052   | Lung     | 0.745 | 0.700 | 0.864 | 1.030 |
| HCC461      | Lung     | 0.714 | 0.612 | 0.735 | 0.583 |
| NCI-H2373   | Lung     | 0.737 | 0.677 | 0.759 | 0.702 |
| NCI-H2452   | Lung     | 0.754 | 0.671 | 0.835 | 0.748 |
| NCI-H28     | Lung     | 0.780 | 0.732 | 0.925 | 0.900 |
| NCI-H2595   | Lung     | 0.783 | 0.745 | 0.800 | 0.814 |
| NCI-H2369   | Lung     | 0.774 | 0.703 | 0.855 | 0.823 |
| NCI-H2803   | Lung     | 0.779 | 0.735 | 0.781 | 0.721 |
| NCI-H2804   | Lung     | 0.781 | 0.744 | 0.866 | 0.876 |
| NCI-H2722   | Lung     | 0.779 | 0.707 | 0.836 | 0.769 |
| NCI-H2810   | Lung     | 0.734 | 0.656 | 0.635 | 0.533 |
| NCI-H2731   | Lung     | 0.747 | 0.672 | 0.853 | 0.816 |
| HPAC        | Pancreas | 0.610 | 0.491 | 0.540 | 0.398 |
| BxPC-3      | Pancreas | 0.674 | 0.560 | 0.742 | 0.632 |
| SW 1990     | Pancreas | 0.675 | 0.575 | 0.708 | 0.621 |
| MIA Paca-2  | Pancreas | 0.697 | 0.595 | 0.584 | 0.447 |
| HUP-T3      | Pancreas | 0.708 | 0.581 | 0.672 | 0.476 |
| PANC-1      | Pancreas | 0.725 | 0.624 | 0.786 | 0.725 |
| PSN1        | Pancreas | 0.622 | 0.478 | 0.422 | 0.194 |
| KP4         | Pancreas | 0.696 | 0.599 | 0.697 | 0.625 |
| SU.86.86    | Pancreas | 0.723 | 0.615 | 0.725 | 0.627 |
| Capan-2     | Pancreas | 0.648 | 0.524 | 0.607 | 0.462 |
| CFPAC-1     | Pancreas | 0.694 | 0.591 | 0.707 | 0.690 |
| Capan-1     | Pancreas | 0.693 | 0.568 | 0.795 | 0.669 |
| HPAF-II     | Pancreas | 0.623 | 0.455 | 0.553 | 0.343 |
| AsPC-1      | Pancreas | 0.603 | 0.458 | 0.611 | 0.479 |
| Hs 766T     | Pancreas | 0.674 | 0.559 | 0.512 | 0.344 |
| Panc 04.03  | Pancreas | 0.649 | 0.537 | 0.603 | 0.460 |
| Panc 03.27  | Pancreas | 0.663 | 0.543 | 0.660 | 0.523 |
| Panc 05.04  | Pancreas | 0.649 | 0.524 | 0.563 | 0.465 |
| Panc 02.03  | Pancreas | 0.607 | 0.464 | 0.447 | 0.257 |
| PA-TU-8988T | Pancreas | 0.738 | 0.655 | 0.713 | 0.708 |
| PA-TU-8902  | Pancreas | 0.643 | 0.504 | 0.638 | 0.446 |
| HUP-T4      | Pancreas | 0.696 | 0.601 | 0.597 | 0.480 |
| KLM-1       | Pancreas | 0.725 | 0.624 | 0.782 | 0.627 |
| KP-3        | Pancreas | 0.722 | 0.636 | 0.811 | 0.772 |
| PK-45H      | Pancreas | 0.702 | 0.601 | 0.506 | 0.366 |
| PK-59       | Pancreas | 0.645 | 0.516 | 0.678 | 0.552 |
| PK-8        | Pancreas | 0.661 | 0.536 | 0.593 | 0.399 |
| QGP-1       | Pancreas | 0.804 | 0.743 | 0.755 | 0.706 |
| DAN-G       | Pancreas | 0.713 | 0.627 | 0.821 | 0.678 |
| KCI-MOH1    | Pancreas | 0.623 | 0.501 | 0.563 | 0.394 |
| PK-1        | Pancreas | 0.647 | 0.530 | 0.579 | 0.441 |
| PK-45P      | Pancreas | 0.675 | 0.568 | 0.632 | 0.501 |
| PA-TU-8988S | Pancreas | 0.682 | 0.568 | 0.668 | 0.512 |
| SUIT-2      | Pancreas | 0.674 | 0.557 | 0.580 | 0.362 |
| TCC-PAN2    | Pancreas | 0.661 | 0.530 | 0.675 | 0.601 |
| YAPC        | Pancreas | 0.672 | 0.567 | 0.780 | 0.718 |

Supplementary Table 10: Predicted and actual mean viabilities in response to either trametinib or cobimetinib for cell lines included in the E-Net training set .



**Supplementary Table 11**

| CC/IM      | MPAS  | PFS (Months) |
|------------|-------|--------------|
| Cell Cycle | 0.33  | 2.76         |
| Cell Cycle | -0.16 | 3.32         |
| Cell Cycle | 0.05  | 7.72         |
| Cell Cycle | 0.16  | 1.84         |
| Cell Cycle | -0.25 | 2.99         |
| Cell Cycle | -0.95 | 0.10         |
| Cell Cycle | 0.05  | 6.54         |
| Cell Cycle | 0.45  | 3.45         |
| Cell Cycle | 1.33  | 7.16         |
| Cell Cycle | 0.15  | 3.45         |
| Cell Cycle | 0.80  | 5.52         |
| Cell Cycle | 0.64  | 3.48         |
| Cell Cycle | 0.24  | 11.07        |
| Cell Cycle | 0.33  | 5.55         |
| Cell Cycle | 0.45  | 5.55         |
| Cell Cycle | 0.36  | 16.59        |
| Cell Cycle | 1.14  | 12.91        |
| Cell Cycle | 0.25  | 2.76         |
| Cell Cycle | 0.00  | 7.46         |
| Cell Cycle | 0.74  | 15.18        |
| Cell Cycle | 1.21  | 12.98        |
| Cell Cycle | 0.15  | 0.03         |
| Cell Cycle | 0.78  | 11.04        |
| Cell Cycle | 0.08  | 3.65         |
| Cell Cycle | 0.52  | 2.83         |
| Cell Cycle | 0.54  | 3.52         |
| Cell Cycle | 0.19  | 2.04         |
| Cell Cycle | 0.51  | 3.94         |
| Cell Cycle | -0.23 | 5.29         |
| Cell Cycle | 1.30  | 14.65        |
| Cell Cycle | 0.34  | 14.98        |
| Cell Cycle | -0.42 | 7.39         |
| Cell Cycle | 0.34  | 2.76         |
| Cell Cycle | 0.12  | 13.67        |
| Cell Cycle | -0.26 | 5.59         |
| Cell Cycle | 0.63  | 9.46         |
| Cell Cycle | -0.01 | 9.13         |
| Cell Cycle | 0.57  | 1.74         |
| Cell Cycle | 0.66  | 3.48         |
| Cell Cycle | -0.32 | 1.87         |
| Cell Cycle | 0.96  | 5.13         |
| Cell Cycle | -0.29 | 3.58         |
| Cell Cycle | -0.05 | 1.84         |
| Cell Cycle | 0.49  | 5.52         |
| Cell Cycle | 0.64  | 3.58         |
| Cell Cycle | 0.26  | 7.62         |
| Cell Cycle | -0.06 | 7.69         |
| Immune     | 0.89  | 16.43        |
| Immune     | -0.11 | 5.55         |
| Immune     | -0.87 | 4.50         |
| Immune     | -0.34 | 11.10        |
| Immune     | -0.35 | 15.01        |
| Immune     | -0.26 | 18.63        |
| Immune     | -0.49 | 7.82         |
| Immune     | -0.06 | 1.87         |
| Immune     | -0.09 | 5.78         |
| Immune     | 0.18  | 18.40        |
| Immune     | 0.54  | 18.60        |
| Immune     | -0.66 | 18.17        |
| Immune     | -0.23 | 3.81         |
| Immune     | 0.11  | 16.85        |

|        |       |       |
|--------|-------|-------|
| Immune | -0.43 | 18.37 |
| Immune | -0.15 | 16.46 |
| Immune | 0.02  | 11.50 |
| Immune | -0.69 | 3.71  |
| Immune | -0.59 | 15.70 |
| Immune | 0.79  | 7.23  |
| Immune | 0.50  | 5.75  |
| Immune | 0.13  | 16.85 |
| Immune | -0.08 | 7.33  |
| Immune | -0.32 | 7.69  |
| Immune | -1.87 | 6.51  |
| Immune | 0.28  | 13.86 |
| Immune | -0.12 | 6.21  |
| Immune | 0.05  | 9.13  |
| Immune | 0.18  | 3.42  |
| Immune | 0.16  | 0.03  |
| Immune | 0.20  | 13.04 |
| Immune | -0.20 | 5.59  |
| Immune | 0.00  | 13.14 |
| Immune | 0.14  | 13.80 |
| Immune | -0.15 | 12.88 |
| Immune | -0.58 | 8.97  |
| Immune | -0.29 | 1.91  |
| Immune | -0.59 | 5.55  |
| Immune | 0.42  | 7.46  |
| Immune | -0.64 | 1.71  |
| Immune | -0.52 | 3.48  |
| Immune | -0.57 | 1.77  |
| Immune | -0.55 | 13.14 |
| Immune | 0.43  | 13.04 |
| Immune | 0.12  | 13.01 |
| Immune | -1.58 | 1.84  |
| Immune | -0.78 | 9.33  |
| Immune | -0.12 | 7.00  |
| Immune | -0.01 | 4.11  |
| Immune | 0.54  | 1.87  |
| Immune | -2.26 | 7.29  |
| Immune | 0.08  | 2.20  |

**Supplementary Table 11: MPAS and PFS of patients included in the vemurafenib arm of the CoBrim trial.**

Supplementary Table 12

| Individual MAPK gene expression (nanosttring counts) |       |       |       |       |       |       |        |       |       | MPAS  | BRAFmutation | KRASmutation | DeathCensor | OYear |
|------------------------------------------------------|-------|-------|-------|-------|-------|-------|--------|-------|-------|-------|--------------|--------------|-------------|-------|
| CCND1                                                | DUSP4 | DUSP6 | EPHA2 | EPHA4 | ETV4  | ETV5  | PHLDA1 | SPRY2 | SPRY4 |       |              |              |             |       |
| 0.71                                                 | 1.67  | 1.58  | 1.18  | 1.50  | 0.68  | 1.32  | 2.12   | 0.42  | 1.07  | 3.87  | MND          | MUT          | 'Censored'  | 1.5   |
| -1.02                                                | -0.22 | -0.43 | -0.66 | -1.10 | 0.18  | -0.41 | -0.12  | 1.01  | -0.60 | -1.07 | MND          | MUT          | 'Death'     | 5.08  |
| 0.04                                                 | 0.90  | 0.55  | 0.71  | 1.13  | -0.29 | 0.34  | 0.52   | 0.48  | -0.01 | 1.38  | MND          | MUT          | 'Censored'  | 5.09  |
| -0.29                                                | -0.43 | -0.68 | -0.08 | -0.86 | -0.89 | -0.75 | -0.40  | 0.20  | -0.24 | -1.40 | <undefined>  | <undefined>  | 'Censored'  | 0.58  |
| -2.11                                                | -0.87 | -1.44 | -2.61 | -2.25 | -1.05 | -1.55 | -1.98  | -1.17 | -1.97 | -5.38 | Unknown      | MUT          | 'Censored'  | 6.42  |
| -0.32                                                | 0.45  | 0.29  | 0.07  | 0.85  | 1.04  | 0.20  | -0.08  | 1.59  | 0.42  | 1.42  | MND          | MUT          | 'Death'     | 4.67  |
| 0.35                                                 | 2.30  | 1.47  | 1.07  | 0.63  | 1.22  | 1.30  | 0.88   | 0.57  | 0.77  | 3.34  | MND          | MUT          | 'Death'     | 2.33  |
| -0.08                                                | 0.66  | 0.14  | 0.61  | 0.89  | -0.36 | -0.44 | 0.29   | 0.80  | 0.28  | 0.89  | MND          | MND          | 'Death'     | 2.92  |
| 1.39                                                 | 0.31  | 1.10  | 1.04  | 0.74  | 0.99  | 1.26  | 0.65   | 0.26  | 0.60  | 2.63  | MND          | MND          | 'Censored'  | 4.67  |
| 1.01                                                 | -0.19 | 0.49  | -0.09 | -0.23 | 0.08  | 0.04  | 0.20   | -0.01 | 0.53  | 0.58  | MND          | MND          | 'Death'     | 3.83  |
| -0.47                                                | -0.57 | -0.70 | -0.37 | -0.40 | -0.83 | -0.39 | 0.93   | 0.13  | -0.30 | -0.94 | MND          | MUT          | 'Death'     | 2.41  |
| -0.20                                                | 0.89  | -0.36 | -1.49 | 0.60  | -0.76 | -0.61 | 0.14   | -0.73 | -1.22 | -1.18 | MND          | MUT          | 'Death'     | 0.59  |
| -4.16                                                | -1.56 | -2.87 | -2.79 | -1.61 | -3.29 | -3.15 | -3.17  | -3.17 | -3.28 | -9.19 | MND          | MUT          | 'Censored'  | 1.33  |
| 0.10                                                 | 0.47  | 0.58  | 1.02  | 1.22  | 0.36  | 0.08  | 0.01   | 0.03  | 0.54  | 1.40  | MND          | MUT          | 'Death'     | 4.92  |
| 1.23                                                 | -0.27 | 0.43  | 0.78  | 0.37  | 0.85  | 0.18  | 0.50   | 0.43  | 0.93  | 1.72  | MND          | MND          | 'Death'     | 9.41  |
| 0.05                                                 | -2.29 | 0.21  | 0.06  | -0.49 | 1.25  | 0.47  | -0.07  | 1.18  | -0.13 | 0.07  | MND          | MUT          | 'Death'     | 2.83  |
| -0.53                                                | -0.07 | -0.34 | 0.17  | -2.25 | -0.16 | 0.31  | 0.20   | -0.74 | -1.05 | -1.41 | MND          | MUT          | 'Death'     | 2.92  |
| 1.31                                                 | 0.55  | 0.43  | 0.66  | 0.21  | 0.77  | 1.27  | 0.23   | 0.67  | 0.23  | 2.00  | MND          | MUT          | 'Death'     | 1.59  |
| 0.08                                                 | -0.15 | -0.30 | -0.28 | -0.46 | 1.04  | 0.07  | -0.97  | 0.63  | -0.10 | -0.14 | MND          | MUT          | 'Death'     | 1.42  |
| 0.61                                                 | 0.48  | -0.22 | 0.20  | -1.10 | 0.91  | -0.34 | -0.45  | -0.06 | 0.27  | 0.10  | MND          | MUT          | 'Death'     | 3.92  |
| -0.14                                                | -0.36 | 0.85  | -0.36 | 0.61  | 0.49  | 0.72  | -0.23  | 0.23  | 0.42  | 0.71  | MND          | MUT          | 'Death'     | 1.66  |
| -0.17                                                | 0.24  | 0.39  | 0.69  | -0.46 | 1.18  | 0.13  | -0.64  | 1.67  | 1.36  | 1.39  | MND          | MND          | 'Death'     | 2.5   |
| -0.66                                                | -1.39 | -1.42 | -0.22 | 0.31  | 0.08  | -0.99 | -1.22  | -0.12 | -0.39 | -1.90 | MND          | MUT          | 'Death'     | 7.33  |
| 0.03                                                 | -0.60 | 0.14  | -0.01 | 0.59  | 0.68  | -0.06 | 0.88   | 0.15  | 0.57  | 0.75  | MND          | MUT          | 'Death'     | 4.33  |
| -1.43                                                | -1.19 | -1.61 | -1.53 | -2.25 | -1.21 | -1.74 | -0.81  | -0.85 | -1.54 | -4.48 | MND          | MUT          | 'Death'     | 0.67  |
| -1.86                                                | -1.47 | -1.92 | -1.88 | -1.32 | -1.45 | -1.55 | -1.06  | -0.93 | -1.41 | -4.69 | MND          | MND          | 'Death'     | 1.83  |
| -1.40                                                | -1.25 | -1.64 | -2.17 | -1.50 | -0.85 | -1.64 | -0.93  | -1.10 | -1.77 | -4.50 | MND          | MUT          | 'Death'     | 7.59  |
| -0.41                                                | -0.09 | -0.94 | -0.22 | 0.81  | -0.99 | -1.14 | -0.05  | -0.52 | -0.42 | -1.26 | MND          | MND          | 'Censored'  | 4.5   |
| 1.13                                                 | 0.22  | 0.70  | 0.86  | -0.15 | 1.51  | 0.27  | 0.84   | 0.92  | 0.83  | 2.25  | MND          | MND          | 'Censored'  | 8.25  |
| -0.35                                                | -0.87 | -0.61 | -0.12 | -1.61 | -0.13 | -1.32 | -0.10  | -0.55 | -0.68 | -2.01 | MND          | MND          | 'Death'     | 3.59  |
| -1.15                                                | -0.74 | -1.13 | -0.35 | -1.24 | -0.82 | -0.49 | -1.34  | -1.34 | -1.12 | -3.08 | MND          | MND          | 'Death'     | 0.08  |
| -0.20                                                | -0.65 | -0.01 | -0.03 | 0.04  | -0.42 | 0.05  | -0.18  | -0.56 | -0.06 | -0.64 | MND          | MND          | 'Death'     | 1.84  |
| 0.41                                                 | 0.88  | 0.55  | -0.37 | 1.19  | 0.03  | -0.17 | 1.12   | 0.41  | 0.41  | 1.41  | MND          | MUT          | 'Death'     | 0.25  |
| 1.27                                                 | -0.48 | 1.20  | 0.54  | -0.77 | 1.70  | 0.34  | 0.32   | 0.78  | 0.84  | 1.82  | MND          | MND          | 'Death'     | 0.33  |
| -1.74                                                | -1.56 | -1.79 | -1.91 | -0.09 | -2.32 | -1.85 | -0.80  | -1.33 | -1.77 | -4.79 | MUT          | MND          | 'Death'     | 0.08  |
| 0.29                                                 | -0.41 | -0.10 | 0.41  | 0.97  | -1.08 | 0.52  | -0.39  | -1.85 | -0.09 | -0.55 | MND          | MND          | 'Death'     | 0.08  |
| 0.63                                                 | -1.91 | -0.18 | -0.42 | -1.40 | 0.90  | -0.90 | -0.91  | 0.17  | -0.13 | -1.31 | MND          | MND          | 'Death'     | 3.17  |
| 1.62                                                 | 0.75  | 0.26  | 0.03  | 0.27  | 0.96  | 0.84  | 1.59   | 1.24  | 1.13  | 2.75  | MND          | MND          | 'Death'     | 1.08  |
| -0.26                                                | -1.91 | -1.16 | -0.59 | -0.86 | -0.58 | -1.09 | -1.00  | -1.46 | -1.26 | -3.22 | MND          | MND          | 'Death'     | 0.84  |
| -0.52                                                | 0.22  | 0.01  | 0.21  | -0.23 | 0.15  | -0.11 | -0.12  | -0.16 | 0.02  | -0.17 | MND          | MUT          | 'Death'     | 0.92  |
| -0.77                                                | -0.99 | -1.55 | -0.30 | 0.27  | -1.30 | -0.39 | -1.11  | -0.92 | -1.23 | -2.62 | MND          | MND          | 'Death'     | 0.42  |
| 0.72                                                 | 0.41  | 0.93  | 0.92  | -0.18 | 0.58  | 0.80  | -0.33  | -0.35 | 0.97  | 1.41  | MND          | MND          | 'Censored'  | 3.5   |
| 0.51                                                 | 0.37  | 0.68  | 0.99  | 1.30  | 0.14  | 0.31  | 0.78   | 0.91  | 0.37  | 2.01  | MND          | MUT          | 'Death'     | 1.58  |

|       |       |       |       |       |       |       |       |       |       |       |             |             |            |       |
|-------|-------|-------|-------|-------|-------|-------|-------|-------|-------|-------|-------------|-------------|------------|-------|
| 0.53  | 0.21  | 0.06  | -0.25 | 0.24  | 0.74  | 0.26  | -0.15 | 0.26  | 0.17  | 0.65  | MND         | MUT         | 'Censored' | 7.25  |
| 0.26  | 0.99  | 0.91  | 1.46  | 1.53  | -0.60 | -0.25 | 0.50  | -0.53 | 0.50  | 1.51  | MND         | MUT         | 'Death'    | 0.17  |
| 1.11  | 1.40  | 1.65  | 1.58  | 1.12  | 1.10  | 1.61  | 2.65  | 2.26  | 1.98  | 5.20  | MND         | MUT         | 'Death'    | 2.5   |
| -1.54 | -0.95 | -1.81 | -1.66 | -0.06 | -1.75 | -1.64 | -0.45 | -1.26 | -1.54 | -4.00 | MND         | MUT         | 'Death'    | 1.25  |
| 0.66  | 0.72  | -0.19 | -0.30 | 1.03  | 0.06  | -0.32 | 0.61  | 0.49  | 0.03  | 0.89  | MND         | MUT         | 'Censored' | 2.67  |
| 0.12  | 0.55  | 0.66  | 0.62  | -0.20 | 0.18  | 0.25  | 0.23  | -0.69 | -0.18 | 0.48  | MUT         | MND         | 'Death'    | 9     |
| 0.31  | 2.26  | 1.96  | 1.62  | 1.19  | 1.35  | 2.82  | 0.64  | 2.42  | 2.51  | 5.40  | MND         | MUT         | 'Death'    | 0.08  |
| 1.49  | -0.30 | 0.69  | 0.02  | 0.40  | 0.71  | 0.88  | -0.05 | 0.73  | 0.52  | 1.60  | MND         | MND         | 'Censored' | 1.67  |
| 0.92  | 0.20  | 0.37  | 0.43  | 0.59  | 0.36  | 1.11  | 0.58  | 0.06  | 0.46  | 1.60  | MND         | MND         | 'Death'    | 0.42  |
| -1.19 | -1.04 | -1.31 | -0.47 | -1.50 | -0.83 | -0.75 | -1.71 | -1.74 | -1.17 | -3.70 | MND         | MND         | 'Death'    | 1     |
| 0.72  | -0.07 | 0.38  | 0.21  | 0.24  | 0.69  | 0.47  | -0.20 | 0.44  | 0.38  | 1.03  | MND         | MND         | 'Death'    | 5.5   |
| 0.71  | 1.86  | 0.88  | 1.65  | 0.37  | 0.55  | 1.40  | 0.80  | 0.66  | 1.38  | 3.24  | MUT         | MND         | 'Death'    | 0.83  |
| 0.58  | 0.30  | 1.34  | 0.69  | 0.53  | 1.08  | 1.42  | 0.67  | 1.06  | 1.07  | 2.76  | MND         | MND         | 'Death'    | 1.08  |
| 0.26  | 0.12  | 0.12  | 0.77  | -0.11 | -0.13 | 0.25  | 0.04  | -0.25 | 0.44  | 0.48  | MND         | MND         | 'Death'    | 2.25  |
| 1.48  | 2.24  | 1.97  | 2.02  | 2.34  | 0.25  | 1.75  | 2.25  | 0.92  | 0.93  | 5.11  | MND         | MUT         | 'Death'    | 0.08  |
| -1.47 | -0.71 | -1.02 | -1.53 | -1.24 | -0.79 | -0.44 | -2.18 | 0.15  | -0.72 | -3.15 | MND         | MUT         | 'Censored' | 5.25  |
| 0.98  | 0.55  | 1.25  | 1.33  | 1.25  | 1.12  | 1.50  | 1.21  | 0.80  | 1.53  | 3.64  | MND         | MND         | 'Censored' | 0.67  |
| 0.08  | 1.47  | 0.37  | 0.49  | 1.16  | -0.46 | 0.75  | 0.12  | -0.13 | -0.11 | 1.19  | MUT         | MND         | 'Death'    | 2.83  |
| 0.31  | -0.36 | 0.06  | -0.91 | -0.81 | 0.40  | -0.41 | 1.35  | 0.35  | 0.36  | 0.11  | MND         | MUT         | 'Death'    | 1.34  |
| -0.90 | 0.36  | -1.00 | -0.20 | 0.99  | -2.49 | -0.08 | -1.19 | -1.34 | -1.29 | -2.26 | MUT         | MND         | 'Death'    | 1.25  |
| -0.33 | -0.71 | 0.05  | -0.23 | -0.60 | 0.32  | -1.09 | -0.92 | -0.41 | -0.64 | -1.44 | <undefined> | <undefined> | 'Censored' | 13.08 |
| 0.07  | 0.15  | -0.23 | -0.34 | -0.97 | 0.05  | 0.04  | -0.29 | -0.72 | -0.12 | -0.75 | MND         | MND         | 'Death'    | 1.34  |
| 0.34  | -0.43 | 0.12  | 0.49  | 0.04  | 0.29  | -0.64 | 0.20  | 0.19  | 0.34  | 0.29  | MND         | MND         | 'Death'    | 6.34  |
| 0.53  | 1.09  | 0.52  | -0.61 | 0.31  | -1.34 | 0.43  | 1.67  | -0.07 | 0.27  | 0.88  | MND         | MUT         | 'Death'    | 1.92  |
| -0.42 | -0.41 | -0.36 | -0.35 | 0.26  | -0.47 | 0.20  | -0.10 | -1.35 | -0.85 | -1.23 | MND         | MUT         | 'Death'    | 1.59  |
| -0.60 | -0.46 | -0.26 | -0.45 | -0.86 | -0.20 | -0.13 | 0.12  | -1.01 | 0.31  | -1.12 | <undefined> | <undefined> | 'Death'    | 2.92  |
| 0.86  | 0.66  | 0.67  | 0.81  | 0.45  | 0.69  | 0.57  | 0.13  | 1.28  | 0.84  | 2.20  | <undefined> | <undefined> | 'Censored' | 3.25  |
| 1.13  | 1.63  | 1.25  | 0.90  | 0.77  | 1.10  | 0.81  | 0.52  | 1.41  | 1.14  | 3.37  | <undefined> | <undefined> | 'Death'    | 1.08  |
| -0.21 | -0.60 | -0.71 | -1.15 | -0.18 | -0.99 | -0.44 | -0.81 | -0.90 | -0.33 | -2.00 | <undefined> | <undefined> | 'Death'    | 6.25  |

Supplementary Table 12: Individual MAPK gene expression, MPAS and overall survival of patients with metastatic CRC.

Supplementary Table 13

| Treatment | individual MAPK gene expression |       |       |      |      |       | MPAS  | CSDIED | TTMDIED | mutation status |      |
|-----------|---------------------------------|-------|-------|------|------|-------|-------|--------|---------|-----------------|------|
|           | DUSP6                           | SPRY2 | CCND1 | ETV4 | ETV5 | EPHA4 |       |        |         | BRAF            | KRAS |
| FOLFOX-4  | 2.99                            | 3.11  | 3.12  | 2.73 | 2.25 | 1.59  | 0.70  | 0      | 72.38   | WT              | WT   |
| FOLFOX-4  | 2.86                            | 2.84  | 2.66  | 2.50 | 2.32 | 2.31  | 0.21  | 0      | 72.54   | MUT             | NA   |
| FOLFOX-4  | 3.01                            | 2.76  | 3.54  | 2.86 | 2.05 | 1.99  | 1.10  | 0      | 76.25   | WT              | NA   |
| FOLFOX-4  | 3.29                            | 3.01  | 3.19  | 2.75 | 2.10 | 2.15  | 1.50  | 1      | 61.11   | WT              | WT   |
| FOLFOX-4  | 3.09                            | 2.63  | 3.21  | 2.21 | 2.06 | 2.68  | 0.60  | 0      | 58.84   | WT              | MUT  |
| FOLFOX-4  | 2.90                            | 2.67  | 3.13  | 2.23 | 2.08 | 2.42  | 0.04  | 1      | 58.87   | WT              | WT   |
| FOLFOX-4  | 2.90                            | 2.85  | 3.04  | 2.82 | 2.15 | 1.57  | -0.02 | 0      | 60.78   | WT              | WT   |
| FOLFOX-4  | 3.35                            | 3.00  | 3.25  | 2.47 | 2.12 | 2.27  | 1.49  | 0      | 48.13   | WT              | MUT  |
| FOLFOX-4  | 2.82                            | 2.66  | 2.99  | 2.30 | 2.00 | 1.85  | -1.05 | 1      | 56.34   | WT              | NA   |
| FOLFOX-4  | 3.13                            | 2.69  | 3.32  | 2.61 | 1.92 | 1.91  | 0.21  | 0      | 66.23   | WT              | MUT  |
| FOLFOX-4  | 3.18                            | 2.88  | 3.18  | 2.77 | 2.08 | 1.72  | 0.59  | 0      | 81.02   | WT              | MUT  |
| FOLFOX-4  | 2.96                            | 2.95  | 3.52  | 2.67 | 1.89 | 1.95  | 0.71  | 0      | 75.63   | WT              | WT   |
| FOLFOX-4  | 3.17                            | 3.15  | 3.36  | 3.01 | 1.92 | 2.22  | 1.83  | 0      | 61.17   | WT              | MUT  |
| FOLFOX-4  | 3.14                            | 2.53  | 3.33  | 2.34 | 2.31 | 2.29  | 0.86  | 0      | 76.62   | WT              | MUT  |
| FOLFOX-4  | 2.72                            | 2.37  | 3.18  | 2.06 | 1.93 | 2.09  | -1.46 | 0      | 68.9    | WT              | NA   |
| FOLFOX-4  | 2.74                            | 2.49  | 2.85  | 1.84 | 1.72 | 1.96  | -2.55 | 1      | 79.34   | WT              | MUT  |
| FOLFOX-4  | 3.47                            | 2.72  | 3.31  | 2.66 | 2.13 | 2.42  | 1.76  | 0      | 76.25   | WT              | MUT  |
| FOLFOX-4  | 3.18                            | 2.77  | 3.42  | 2.67 | 2.19 | 2.71  | 2.09  | 0      | 66.99   | WT              | WT   |
| FOLFOX-4  | 3.10                            | 3.02  | 2.99  | 2.95 | 2.03 | 1.88  | 0.72  | 0      | 78.49   | WT              | MUT  |
| FOLFOX-4  | 2.70                            | 2.81  | 3.02  | 2.14 | 1.89 | 2.16  | -0.97 | 0      | 78.16   | WT              | WT   |
| FOLFOX-4  | 2.87                            | 2.67  | 3.15  | 2.72 | 1.90 | 2.52  | 0.38  | 0      | 63.18   | WT              | NA   |
| FOLFOX-4  | 2.61                            | 2.81  | 2.82  | 2.64 | 1.86 | 1.71  | -1.40 | 0      | 67.25   | WT              | MUT  |
| FOLFOX-4  | 2.84                            | 2.48  | 2.97  | 2.61 | 2.11 | 1.91  | -0.66 | 0      | 79.93   | WT              | NA   |
| FOLFOX-4  | 3.14                            | 2.81  | 3.42  | 2.98 | 2.07 | 1.87  | 1.20  | 0      | 71.33   | WT              | MUT  |
| FOLFOX-4  | 2.98                            | 2.77  | 3.31  | 2.38 | 2.18 | 2.29  | 0.77  | 0      | 84.24   | WT              | NA   |
| FOLFOX-4  | 3.33                            | 2.94  | 3.23  | 2.65 | 2.32 | 2.21  | 1.88  | 0      | 79.01   | WT              | MUT  |
| FOLFOX-4  | 3.11                            | 3.03  | 3.30  | 2.66 | 1.70 | 2.46  | 0.95  | 0      | 81.35   | WT              | MUT  |
| FOLFOX-4  | 3.01                            | 3.20  | 3.25  | 3.08 | 2.23 | 2.04  | 2.00  | 1      | 62.88   | WT              | MUT  |
| FOLFOX-4  | 2.91                            | 2.61  | 3.12  | 2.28 | 1.99 | 2.27  | -0.35 | 1      | 55.59   | WT              | MUT  |
| FOLFOX-4  | 2.83                            | 3.22  | 3.16  | 2.80 | 1.88 | 2.67  | 1.39  | 0      | 78.46   | WT              | MUT  |
| FOLFOX-4  | 3.15                            | 2.73  | 3.29  | 2.46 | 2.26 | 2.52  | 1.44  | 1      | 61.7    | MUT             | WT   |
| FOLFOX-4  | 2.96                            | 2.31  | 3.13  | 2.35 | 2.34 | 1.97  | -0.34 | 0      | 0.03    | MUT             | NA   |
| FOLFOX-4  | 2.30                            | 2.34  | 2.44  | 1.93 | 1.54 | 1.41  | -4.87 | 0      | 82.5    | WT              | WT   |
| FOLFOX-4  | 3.01                            | 2.47  | 3.07  | 2.70 | 1.91 | 1.72  | -0.82 | 0      | 76.58   | WT              | MUT  |
| FOLFOX-4  | 2.98                            | 2.48  | 3.21  | 2.83 | 1.79 | 1.93  | -0.46 | 0      | 81.74   | WT              | WT   |
| FOLFOX-4  | 2.88                            | 2.70  | 3.11  | 2.89 | 1.88 | 1.72  | -0.42 | 0      | 59.37   | WT              | MUT  |
| FOLFOX-4  | 2.33                            | 2.38  | 3.14  | 2.25 | 1.90 | 1.77  | -2.25 | 0      | 65.05   | WT              | WT   |
| FOLFOX-4  | 2.53                            | 2.11  | 2.79  | 1.98 | 1.69 | 1.82  | -3.57 | 0      | 80.76   | WT              | NA   |
| FOLFOX-4  | 3.05                            | 2.63  | 3.39  | 2.34 | 2.05 | 2.39  | 0.60  | 0      | 80.79   | WT              | MUT  |
| FOLFOX-4  | 2.92                            | 2.71  | 3.15  | 2.56 | 1.86 | 1.91  | -0.47 | 0      | 73.36   | WT              | MUT  |
| FOLFOX-4  | 3.46                            | 2.83  | 3.47  | 2.71 | 2.30 | 2.37  | 2.47  | 0      | 68.8    | WT              | MUT  |
| FOLFOX-4  | 3.05                            | 2.86  | 3.49  | 2.26 | 2.11 | 2.76  | 1.58  | 0      | 78      | WT              | WT   |
| FOLFOX-4  | 3.15                            | 2.73  | 3.20  | 2.27 | 2.32 | 2.35  | 1.01  | 0      | 84.11   | WT              | WT   |

|          |      |      |      |      |      |      |       |   |       |     |     |
|----------|------|------|------|------|------|------|-------|---|-------|-----|-----|
| FOLFOX-4 | 3.29 | 3.04 | 3.12 | 2.85 | 2.31 | 1.79 | 1.52  | 0 | 62.09 | WT  | MUT |
| FOLFOX-4 | 2.95 | 2.58 | 3.28 | 2.32 | 1.82 | 2.12 | -0.54 | 0 | 81.84 | WT  | WT  |
| FOLFOX-4 | 2.58 | 2.46 | 3.01 | 2.39 | 1.99 | 1.81 | -1.62 | 1 | 56.8  | WT  | NA  |
| FOLFOX-4 | 2.98 | 2.38 | 3.13 | 2.60 | 2.05 | 2.09 | -0.31 | 0 | 72.57 | WT  | NA  |
| FOLFOX-4 | 3.09 | 2.62 | 3.22 | 1.59 | 1.95 | 1.99 | -1.16 | 0 | 81.22 | WT  | NA  |
| FOLFOX-4 | 2.89 | 2.65 | 3.28 | 2.45 | 2.05 | 1.66 | -0.48 | 0 | 84.27 | WT  | WT  |
| FOLFOX-4 | 2.97 | 2.94 | 3.28 | 2.63 | 2.62 | 2.04 | 1.81  | 0 | 68.7  | WT  | WT  |
| FOLFOX-4 | 2.91 | 2.71 | 3.19 | 2.82 | 1.88 | 1.76 | -0.27 | 0 | 84.01 | WT  | NA  |
| FOLFOX-4 | 3.35 | 2.81 | 2.95 | 2.60 | 2.11 | 1.97 | 0.54  | 0 | 65.31 | WT  | MUT |
| FOLFOX-4 | 3.16 | 2.72 | 3.31 | 2.60 | 2.15 | 2.00 | 0.78  | 0 | 84.11 | WT  | NA  |
| FOLFOX-4 | 3.01 | 2.81 | 3.23 | 2.82 | 1.89 | 1.89 | 0.23  | 0 | 72.25 | WT  | WT  |
| FOLFOX-4 | 2.96 | 2.75 | 3.37 | 2.74 | 2.04 | 1.63 | 0.18  | 0 | 64.43 | WT  | WT  |
| FOLFOX-4 | 2.90 | 2.95 | 3.57 | 2.57 | 2.07 | 2.35 | 1.40  | 0 | 86.28 | WT  | MUT |
| FOLFOX-4 | 3.42 | 3.02 | 3.42 | 2.66 | 1.72 | 1.81 | 0.78  | 0 | 84.37 | WT  | MUT |
| FOLFOX-4 | 2.88 | 2.77 | 3.20 | 2.69 | 1.83 | 1.81 | -0.43 | 0 | 63.41 | WT  | WT  |
| FOLFOX-4 | 2.96 | 2.76 | 2.93 | 2.50 | 1.80 | 2.35 | -0.34 | 0 | 79.01 | WT  | NA  |
| FOLFOX-4 | 3.11 | 2.68 | 3.16 | 2.81 | 2.10 | 1.89 | 0.46  | 0 | 62.03 | WT  | WT  |
| FOLFOX-4 | 3.02 | 3.26 | 3.17 | 2.94 | 2.03 | 1.76 | 1.08  | 0 | 76.42 | WT  | MUT |
| FOLFOX-4 | 2.99 | 2.59 | 3.21 | 2.49 | 2.21 | 1.90 | 0.09  | 0 | 67.38 | WT  | WT  |
| FOLFOX-4 | 3.04 | 2.82 | 3.39 | 2.83 | 1.88 | 1.81 | 0.42  | 0 | 63.15 | WT  | WT  |
| FOLFOX-4 | 2.64 | 2.81 | 3.01 | 2.37 | 1.85 | 1.76 | -1.35 | 0 | 82.83 | WT  | WT  |
| FOLFOX-4 | 3.12 | 3.33 | 3.40 | 3.01 | 2.21 | 2.64 | 3.16  | 0 | 86.01 | WT  | MUT |
| FOLFOX-4 | 3.21 | 2.77 | 3.42 | 2.73 | 2.02 | 2.42 | 1.51  | 0 | 72.11 | WT  | WT  |
| FOLFOX-4 | 3.09 | 3.40 | 2.60 | 2.82 | 2.37 | 2.63 | 2.12  | 0 | 84.63 | MUT | NA  |
| FOLFOX-4 | 2.34 | 2.45 | 2.96 | 2.35 | 1.60 | 1.83 | -2.79 | 0 | 76.65 | WT  | NA  |
| FOLFOX-4 | 3.31 | 2.99 | 3.33 | 2.98 | 2.21 | 2.01 | 2.03  | 0 | 61.7  | WT  | MUT |
| FOLFOX-4 | 2.73 | 2.53 | 3.10 | 2.23 | 2.09 | 2.01 | -0.90 | 1 | 75.04 | WT  | WT  |
| FOLFOX-4 | 3.10 | 2.71 | 3.27 | 2.26 | 2.33 | 2.41 | 1.08  | 1 | 72.15 | WT  | MUT |
| FOLFOX-4 | 2.88 | 2.51 | 2.83 | 1.46 | 1.93 | 2.56 | -1.69 | 0 | 60.94 | WT  | WT  |
| FOLFOX-4 | 2.97 | 2.69 | 2.91 | 2.56 | 1.89 | 2.12 | -0.49 | 0 | 83.65 | WT  | WT  |
| FOLFOX-4 | 2.71 | 2.62 | 3.12 | 2.51 | 1.80 | 1.60 | -1.50 | 0 | 83.29 | WT  | WT  |
| FOLFOX-4 | 2.91 | 2.93 | 3.14 | 2.92 | 1.94 | 1.68 | 0.13  | 0 | 80.03 | WT  | NA  |
| FOLFOX-4 | 3.33 | 3.07 | 3.13 | 2.72 | 2.26 | 1.95 | 1.56  | 1 | 30.49 | WT  | MUT |
| FOLFOX-4 | 2.73 | 2.64 | 3.02 | 2.67 | 1.96 | 1.93 | -0.68 | 0 | 84.96 | WT  | NA  |
| FOLFOX-4 | 2.92 | 2.82 | 3.09 | 2.60 | 2.12 | 2.47 | 0.81  | 0 | 66.83 | WT  | MUT |
| FOLFOX-4 | 2.69 | 2.23 | 2.81 | 1.90 | 2.09 | 2.08 | -2.16 | 0 | 78.95 | WT  | NA  |
| FOLFOX-4 | 2.78 | 2.66 | 3.28 | 2.51 | 1.83 | 2.13 | -0.41 | 0 | 78.39 | WT  | NA  |
| FOLFOX-4 | 2.82 | 2.65 | 3.11 | 2.81 | 2.10 | 1.93 | 0.01  | 0 | 83.12 | MUT | NA  |
| FOLFOX-4 | 3.12 | 2.70 | 3.05 | 1.92 | 2.08 | 2.51 | 0.01  | 0 | 30.09 | WT  | WT  |
| FOLFOX-4 | 3.43 | 2.82 | 3.25 | 3.02 | 2.12 | 2.34 | 2.08  | 0 | 79.61 | WT  | MUT |
| FOLFOX-4 | 2.82 | 3.19 | 3.32 | 2.61 | 2.29 | 1.95 | 1.28  | 0 | 78    | WT  | MUT |
| FOLFOX-4 | 2.84 | 2.63 | 3.22 | 2.20 | 1.89 | 1.80 | -1.11 | 0 | 85.72 | WT  | NA  |
| FOLFOX-4 | 3.06 | 2.72 | 3.19 | 2.71 | 1.80 | 2.11 | 0.08  | 0 | 71.85 | WT  | WT  |
| FOLFOX-4 | 2.79 | 2.66 | 2.92 | 1.93 | 1.75 | 2.08 | -1.82 | 0 | 60.22 | WT  | MUT |
| FOLFOX-4 | 3.17 | 2.74 | 3.02 | 2.40 | 1.83 | 2.50 | 0.16  | 0 | 84.53 | WT  | MUT |
| FOLFOX-4 | 2.95 | 2.74 | 3.28 | 2.81 | 2.12 | 1.70 | 0.34  | 0 | 77.31 | WT  | NA  |

|          |      |      |      |      |      |      |       |   |       |     |     |
|----------|------|------|------|------|------|------|-------|---|-------|-----|-----|
| FOLFOX-4 | 3.07 | 2.98 | 3.22 | 2.67 | 2.06 | 2.16 | 1.05  | 0 | 65.91 | WT  | WT  |
| FOLFOX-4 | 2.96 | 2.42 | 3.17 | 2.39 | 1.92 | 1.79 | -1.07 | 0 | 75.01 | NA  | WT  |
| FOLFOX-4 | 2.94 | 2.89 | 3.43 | 2.94 | 1.86 | 1.84 | 0.58  | 0 | 79.15 | WT  | NA  |
| FOLFOX-4 | 3.09 | 2.68 | 3.00 | 2.20 | 1.74 | 2.30 | -0.70 | 0 | 67.19 | WT  | NA  |
| FOLFOX-4 | 2.78 | 2.56 | 3.16 | 2.63 | 1.92 | 1.89 | -0.71 | 0 | 66.76 | WT  | MUT |
| FOLFOX-4 | 3.35 | 2.99 | 3.09 | 2.78 | 2.05 | 2.28 | 1.50  | 0 | 74.51 | WT  | MUT |
| FOLFOX-4 | 3.32 | 3.01 | 3.01 | 2.58 | 2.00 | 1.95 | 0.64  | 0 | 72.21 | WT  | MUT |
| FOLFOX-4 | 2.92 | 2.86 | 3.20 | 2.52 | 1.94 | 1.95 | -0.04 | 0 | 78.19 | WT  | NA  |
| FOLFOX-4 | 3.10 | 2.88 | 3.56 | 2.85 | 1.92 | 1.88 | 1.05  | 0 | 78.19 | WT  | WT  |
| FOLFOX-4 | 2.83 | 2.57 | 2.78 | 2.56 | 1.87 | 2.31 | -0.87 | 0 | 84.63 | WT  | NA  |
| FOLFOX-4 | 2.98 | 2.32 | 3.34 | 2.21 | 2.28 | 1.82 | -0.41 | 0 | 66.73 | WT  | MUT |
| FOLFOX-4 | 2.71 | 2.81 | 2.44 | 2.47 | 1.99 | 1.83 | -1.62 | 0 | 49.51 | WT  | NA  |
| FOLFOX-4 | 2.40 | 2.64 | 2.94 | 2.76 | 1.56 | 1.86 | -2.02 | 0 | 78.92 | WT  | WT  |
| FOLFOX-4 | 2.77 | 2.55 | 2.87 | 1.91 | 2.05 | 2.28 | -1.29 | 0 | 84.11 | WT  | NA  |
| FOLFOX-4 | 3.30 | 2.99 | 3.28 | 2.80 | 2.30 | 1.99 | 1.86  | 0 | 60.06 | WT  | NA  |
| FOLFOX-4 | 2.85 | 2.85 | 2.98 | 2.74 | 2.16 | 1.69 | -0.12 | 0 | 82.2  | WT  | MUT |
| FOLFOX-4 | 3.21 | 2.85 | 3.03 | 2.44 | 2.07 | 2.31 | 0.67  | 0 | 72.21 | WT  | MUT |
| FOLFOX-4 | 3.16 | 2.89 | 3.11 | 2.69 | 1.84 | 1.93 | 0.18  | 0 | 60.12 | WT  | WT  |
| FOLFOX-4 | 2.91 | 2.70 | 2.98 | 2.38 | 1.94 | 2.15 | -0.52 | 0 | 73.66 | WT  | NA  |
| FOLFOX-4 | 2.90 | 2.76 | 3.05 | 2.26 | 1.76 | 2.38 | -0.56 | 0 | 66.27 | WT  | MUT |
| FOLFOX-4 | 2.91 | 3.04 | 3.32 | 2.27 | 1.81 | 2.52 | 0.55  | 0 | 65.61 | MUT | WT  |
| FOLFOX-4 | 2.67 | 2.75 | 2.70 | 2.32 | 1.68 | 1.76 | -2.23 | 0 | 72.74 | WT  | NA  |
| FOLFOX-4 | 2.63 | 2.81 | 3.12 | 1.83 | 1.83 | 2.23 | -1.32 | 0 | 67.78 | WT  | WT  |
| FOLFOX-4 | 2.73 | 2.53 | 3.00 | 2.46 | 1.94 | 2.03 | -1.05 | 0 | 86.01 | WT  | MUT |
| FOLFOX-4 | 3.19 | 2.42 | 3.19 | 2.57 | 2.14 | 2.04 | 0.20  | 1 | 16.2  | WT  | NA  |
| FOLFOX-4 | 2.88 | 2.52 | 3.10 | 2.58 | 2.08 | 2.16 | -0.16 | 0 | 83.88 | WT  | WT  |
| FOLFOX-4 | 3.24 | 2.62 | 3.28 | 2.98 | 1.74 | 1.89 | 0.24  | 0 | 78.69 | WT  | WT  |
| FOLFOX-4 | 3.48 | 2.89 | 3.25 | 2.60 | 2.11 | 2.32 | 1.70  | 0 | 48    | WT  | WT  |
| FOLFOX-4 | 3.02 | 2.70 | 2.73 | 2.81 | 2.08 | 2.05 | -0.12 | 1 | 43.2  | WT  | MUT |
| FOLFOX-4 | 2.97 | 2.55 | 2.88 | 2.45 | 1.89 | 1.83 | -1.23 | 0 | 82    | WT  | NA  |
| FOLFOX-4 | 3.02 | 2.71 | 2.81 | 2.07 | 2.13 | 2.47 | -0.25 | 0 | 79.64 | WT  | MUT |
| FOLFOX-4 | 3.07 | 2.64 | 3.18 | 2.53 | 1.99 | 2.20 | 0.22  | 0 | 83.58 | WT  | WT  |
| FOLFOX-4 | 2.80 | 2.74 | 3.38 | 2.65 | 2.05 | 2.08 | 0.42  | 0 | 85.68 | WT  | NA  |
| FOLFOX-4 | 3.32 | 3.02 | 3.14 | 2.51 | 2.26 | 2.44 | 1.85  | 0 | 83.84 | WT  | NA  |
| FOLFOX-4 | 2.75 | 2.49 | 2.91 | 2.26 | 1.59 | 2.00 | -2.15 | 0 | 79.11 | WT  | MUT |
| FOLFOX-4 | 2.40 | 2.15 | 2.68 | 1.98 | 1.38 | 2.10 | -4.09 | 0 | 79.93 | WT  | NA  |
| FOLFOX-4 | 2.67 | 2.84 | 3.16 | 2.76 | 1.79 | 2.21 | -0.16 | 0 | 81.05 | WT  | MUT |
| FOLFOX-4 | 3.17 | 2.83 | 3.18 | 2.57 | 2.16 | 2.18 | 0.96  | 1 | 30.13 | WT  | MUT |
| FOLFOX-4 | 2.90 | 2.59 | 3.21 | 2.29 | 2.13 | 1.73 | -0.62 | 0 | 75.07 | WT  | NA  |
| FOLFOX-4 | 2.81 | 2.52 | 3.09 | 2.24 | 1.93 | 2.14 | -0.97 | 0 | 67.38 | WT  | WT  |
| FOLFOX-4 | 3.01 | 2.84 | 3.19 | 2.73 | 2.11 | 2.09 | 0.78  | 0 | 79.7  | WT  | MUT |
| FOLFOX-4 | 2.88 | 2.67 | 3.05 | 2.42 | 1.98 | 2.12 | -0.43 | 0 | 76.42 | WT  | NA  |
| FOLFOX-4 | 3.06 | 2.39 | 3.05 | 2.00 | 2.06 | 2.39 | -0.62 | 0 | 84.01 | WT  | MUT |
| FOLFOX-4 | 3.12 | 2.71 | 3.26 | 2.82 | 1.85 | 1.83 | 0.13  | 0 | 74.74 | WT  | MUT |
| FOLFOX-4 | 2.61 | 2.68 | 3.00 | 2.64 | 1.71 | 2.11 | -1.14 | 0 | 73    | WT  | NA  |
| FOLFOX-4 | 2.71 | 1.87 | 3.11 | 1.86 | 1.89 | 1.81 | -2.99 | 0 | 85.03 | MUT | NA  |

|          |      |      |      |      |      |      |       |   |       |     |     |
|----------|------|------|------|------|------|------|-------|---|-------|-----|-----|
| FOLFOX-4 | 3.31 | 2.83 | 2.96 | 2.61 | 2.23 | 2.01 | 0.82  | 1 | 74.84 | WT  | WT  |
| FOLFOX-4 | 2.94 | 2.40 | 2.92 | 2.18 | 2.15 | 2.39 | -0.58 | 0 | 78.19 | WT  | NA  |
| FOLFOX-4 | 2.68 | 2.65 | 2.83 | 2.49 | 1.86 | 1.85 | -1.54 | 0 | 77.83 | WT  | WT  |
| FOLFOX-4 | 3.05 | 2.58 | 2.95 | 2.54 | 1.88 | 2.00 | -0.66 | 0 | 60.68 | WT  | NA  |
| FOLFOX-4 | 3.08 | 2.63 | 3.22 | 2.25 | 2.21 | 2.23 | 0.39  | 0 | 78.59 | WT  | MUT |
| FOLFOX-4 | 2.80 | 2.79 | 3.28 | 2.73 | 1.90 | 1.71 | -0.29 | 0 | 61.77 | WT  | NA  |
| FOLFOX-4 | 2.59 | 2.63 | 2.76 | 2.49 | 2.01 | 2.03 | -1.30 | 0 | 82.5  | WT  | NA  |
| FOLFOX-4 | 2.79 | 2.47 | 2.56 | 1.91 | 1.76 | 1.95 | -2.79 | 0 | 80.72 | WT  | MUT |
| FOLFOX-4 | 3.18 | 2.79 | 3.15 | 2.57 | 2.23 | 1.98 | 0.78  | 0 | 83.06 | WT  | WT  |
| FOLFOX-4 | 3.12 | 2.75 | 3.17 | 2.34 | 1.70 | 1.76 | -0.88 | 0 | 77.34 | WT  | WT  |
| FOLFOX-4 | 2.67 | 2.49 | 3.04 | 2.51 | 1.71 | 1.32 | -2.39 | 0 | 68.76 | WT  | MUT |
| FOLFOX-4 | 2.77 | 2.83 | 3.19 | 2.44 | 1.68 | 1.84 | -1.01 | 0 | 83.61 | WT  | WT  |
| FOLFOX-4 | 2.81 | 2.48 | 3.06 | 2.46 | 1.57 | 1.52 | -2.28 | 0 | 72.57 | WT  | NA  |
| FOLFOX-4 | 3.01 | 2.90 | 2.98 | 2.18 | 2.14 | 2.22 | 0.14  | 0 | 83.98 | WT  | WT  |
| FOLFOX-4 | 2.91 | 2.03 | 3.32 | 1.71 | 2.03 | 1.60 | -2.32 | 0 | 74.28 | MUT | NA  |
| FOLFOX-4 | 2.91 | 2.36 | 3.24 | 2.17 | 1.93 | 1.95 | -1.17 | 0 | 82.23 | MUT | WT  |
| FOLFOX-4 | 2.85 | 2.67 | 3.06 | 2.23 | 1.94 | 1.76 | -1.19 | 0 | 73.17 | WT  | WT  |
| FOLFOX-4 | 3.27 | 2.85 | 3.56 | 2.56 | 2.00 | 2.25 | 1.48  | 0 | 66.04 | WT  | MUT |
| FOLFOX-4 | 3.02 | 2.60 | 3.13 | 2.41 | 2.26 | 2.41 | 0.64  | 0 | 47.74 | WT  | MUT |
| FOLFOX-4 | 3.06 | 2.65 | 3.22 | 2.51 | 2.07 | 2.55 | 0.84  | 0 | 80.62 | WT  | MUT |
| FOLFOX-4 | 3.29 | 2.88 | 3.09 | 2.77 | 2.03 | 1.83 | 0.64  | 0 | 60.52 | WT  | MUT |
| FOLFOX-4 | 2.61 | 2.43 | 2.81 | 2.23 | 1.77 | 1.68 | -2.67 | 0 | 76.16 | WT  | MUT |
| FOLFOX-4 | 2.82 | 2.79 | 3.62 | 2.63 | 1.79 | 1.84 | 0.06  | 0 | 70.28 | WT  | WT  |
| FOLFOX-4 | 2.85 | 2.78 | 2.88 | 2.58 | 1.75 | 1.98 | -0.99 | 0 | 84.37 | WT  | WT  |
| FOLFOX-4 | 2.98 | 2.62 | 3.03 | 2.46 | 1.76 | 1.66 | -1.34 | 0 | 62    | WT  | WT  |
| FOLFOX-4 | 2.98 | 2.79 | 3.13 | 2.37 | 2.04 | 1.99 | -0.11 | 0 | 68.73 | WT  | NA  |
| FOLFOX-4 | 2.80 | 2.39 | 2.81 | 2.16 | 2.02 | 2.42 | -1.20 | 1 | 4.99  | WT  | NA  |
| FOLFOX-4 | 3.14 | 2.35 | 2.88 | 2.03 | 1.88 | 2.03 | -1.58 | 1 | 12.85 | WT  | NA  |
| FOLFOX-4 | 3.03 | 2.71 | 2.74 | 2.85 | 1.79 | 1.86 | -0.80 | 0 | 87    | WT  | NA  |
| FOLFOX-4 | 2.66 | 3.03 | 3.00 | 2.60 | 1.99 | 1.46 | -0.83 | 0 | 60.58 | WT  | NA  |
| FOLFOX-4 | 2.82 | 2.36 | 3.23 | 2.53 | 2.08 | 1.38 | -1.30 | 0 | 82.66 | WT  | WT  |
| FOLFOX-4 | 3.15 | 2.85 | 3.18 | 2.15 | 2.04 | 2.38 | 0.49  | 0 | 76.16 | WT  | MUT |
| FOLFOX-4 | 3.33 | 2.72 | 3.30 | 2.65 | 2.09 | 2.31 | 1.34  | 0 | 78.85 | WT  | MUT |
| FOLFOX-4 | 2.83 | 2.92 | 3.12 | 2.54 | 1.66 | 2.39 | -0.15 | 0 | 68.76 | WT  | MUT |
| FOLFOX-4 | 2.71 | 2.92 | 3.35 | 2.36 | 2.06 | 2.33 | 0.51  | 0 | 84.83 | WT  | NA  |
| FOLFOX-4 | 3.06 | 2.69 | 3.21 | 2.94 | 2.00 | 1.84 | 0.39  | 0 | 57.1  | WT  | MUT |
| FOLFOX-4 | 3.47 | 2.66 | 3.33 | 2.68 | 2.13 | 2.10 | 1.35  | 1 | 21.95 | WT  | NA  |
| FOLFOX-4 | 3.25 | 2.82 | 3.42 | 2.67 | 2.27 | 2.06 | 1.62  | 0 | 59.63 | WT  | MUT |
| FOLFOX-4 | 3.35 | 3.03 | 3.28 | 2.47 | 2.11 | 2.34 | 1.66  | 1 | 49.74 | WT  | MUT |
| FOLFOX-4 | 2.96 | 2.84 | 3.75 | 2.35 | 2.06 | 2.57 | 1.58  | 0 | 73.53 | WT  | MUT |
| FOLFOX-4 | 3.10 | 3.24 | 3.06 | 2.91 | 2.11 | 2.53 | 2.06  | 0 | 82.66 | WT  | MUT |
| FOLFOX-4 | 3.15 | 2.90 | 3.25 | 2.58 | 1.97 | 2.64 | 1.37  | 0 | 63.64 | MUT | NA  |
| FOLFOX-4 | 3.20 | 3.03 | 3.12 | 2.92 | 2.08 | 1.92 | 1.17  | 0 | 76.75 | WT  | MUT |
| FOLFOX-4 | 3.21 | 3.15 | 3.17 | 2.80 | 2.27 | 2.10 | 1.90  | 0 | 81.25 | WT  | MUT |
| FOLFOX-4 | 3.09 | 2.79 | 2.99 | 2.61 | 2.09 | 2.32 | 0.61  | 0 | 77.9  | WT  | WT  |
| FOLFOX-4 | 3.38 | 2.77 | 3.13 | 3.07 | 2.39 | 2.16 | 2.11  | 0 | 72.57 | MUT | WT  |



|          |      |      |      |      |      |      |       |   |       |     |     |
|----------|------|------|------|------|------|------|-------|---|-------|-----|-----|
| FOLFOX-4 | 3.14 | 2.85 | 3.54 | 2.62 | 2.19 | 2.53 | 2.05  | 1 | 47.28 | WT  | MUT |
| FOLFOX-4 | 2.88 | 2.78 | 3.44 | 2.03 | 1.97 | 2.39 | 0.15  | 0 | 59.3  | WT  | WT  |
| FOLFOX-4 | 3.24 | 2.76 | 3.14 | 2.72 | 1.88 | 1.96 | 0.27  | 0 | 54.31 | WT  | WT  |
| FOLFOX-4 | 3.00 | 3.32 | 3.05 | 2.78 | 1.95 | 1.83 | 0.73  | 0 | 77.14 | WT  | MUT |
| FOLFOX-4 | 3.35 | 2.94 | 3.19 | 2.54 | 2.29 | 2.47 | 1.97  | 0 | 60.98 | WT  | MUT |
| FOLFOX-4 | 2.71 | 2.79 | 2.69 | 1.98 | 1.68 | 2.39 | -1.78 | 1 | 52.07 | WT  | NA  |
| FOLFOX-4 | 3.08 | 2.75 | 3.15 | 2.16 | 1.95 | 2.24 | -0.13 | 0 | 76.48 | WT  | NA  |
| FOLFOX-4 | 3.22 | 2.76 | 3.23 | 2.10 | 2.17 | 2.81 | 1.24  | 0 | 59.63 | MUT | WT  |
| FOLFOX-4 | 3.27 | 2.78 | 3.67 | 2.74 | 1.90 | 1.91 | 1.16  | 0 | 57.3  | WT  | NA  |
| FOLFOX-4 | 3.14 | 2.41 | 3.13 | 2.19 | 2.23 | 2.18 | -0.08 | 1 | 60.94 | WT  | MUT |
| FOLFOX-4 | 3.43 | 2.76 | 3.50 | 2.54 | 2.16 | 2.48 | 2.06  | 0 | 60.29 | WT  | WT  |
| FOLFOX-4 | 2.80 | 2.82 | 3.31 | 2.72 | 1.88 | 2.44 | 0.62  | 0 | 59.99 | WT  | WT  |
| FOLFOX-4 | 3.12 | 2.67 | 3.27 | 2.39 | 2.20 | 2.09 | 0.57  | 1 | 40.25 | WT  | MUT |
| FOLFOX-4 | 3.22 | 2.87 | 3.27 | 2.75 | 2.39 | 2.43 | 2.19  | 0 | 63.61 | WT  | MUT |
| FOLFOX-4 | 3.20 | 2.46 | 3.29 | 2.10 | 1.78 | 2.35 | -0.44 | 0 | 73.79 | WT  | WT  |
| FOLFOX-4 | 2.96 | 2.64 | 3.23 | 2.51 | 2.02 | 2.12 | 0.08  | 0 | 75.04 | WT  | WT  |
| FOLFOX-4 | 2.98 | 2.37 | 2.67 | 1.52 | 2.01 | 2.21 | -2.20 | 0 | 66.27 | WT  | MUT |
| FOLFOX-4 | 3.05 | 2.98 | 3.44 | 2.63 | 1.71 | 2.21 | 0.67  | 0 | 75.37 | WT  | MUT |
| FOLFOX-4 | 3.25 | 2.81 | 3.38 | 2.68 | 1.94 | 2.16 | 1.05  | 0 | 59.93 | WT  | MUT |
| FOLFOX-4 | 3.31 | 2.89 | 3.11 | 2.69 | 2.05 | 1.86 | 0.70  | 0 | 77.77 | WT  | NA  |
| FOLFOX-4 | 3.11 | 2.81 | 3.07 | 2.49 | 2.12 | 2.17 | 0.53  | 0 | 65.15 | WT  | NA  |
| FOLFOX-4 | 2.84 | 2.51 | 2.76 | 2.08 | 2.04 | 1.85 | -1.77 | 0 | 63.44 | WT  | NA  |
| FOLFOX-4 | 2.76 | 2.73 | 3.38 | 2.54 | 1.93 | 1.92 | -0.21 | 0 | 81.15 | WT  | NA  |
| FOLFOX-4 | 3.12 | 2.46 | 3.50 | 2.10 | 2.34 | 1.97 | 0.39  | 0 | 60.81 | NA  | WT  |
| FOLFOX-4 | 2.91 | 3.04 | 3.32 | 2.27 | 1.81 | 2.52 | 0.55  | 1 | 35.65 | MUT | NA  |
| FOLFOX-4 | 2.77 | 2.43 | 3.00 | 2.29 | 1.91 | 1.68 | -1.84 | 0 | 77.8  | WT  | MUT |
| FOLFOX-4 | 2.91 | 3.04 | 3.32 | 2.27 | 1.81 | 2.52 | 0.55  | 0 | 81.08 | WT  | WT  |
| FOLFOX-4 | 3.11 | 3.15 | 3.55 | 3.05 | 2.34 | 1.98 | 2.63  | 0 | 67.88 | WT  | MUT |
| FOLFOX-4 | 2.91 | 2.40 | 2.76 | 1.85 | 2.18 | 2.29 | -1.30 | 0 | 71.33 | WT  | NA  |
| FOLFOX-4 | 3.22 | 2.78 | 3.17 | 2.08 | 2.57 | 2.72 | 1.81  | 1 | 66.6  | WT  | WT  |
| FOLFOX-4 | 3.31 | 2.73 | 3.36 | 2.90 | 1.64 | 1.81 | 0.25  | 0 | 59.66 | WT  | WT  |
| FOLFOX-4 | 3.11 | 2.92 | 3.40 | 2.38 | 2.19 | 2.08 | 1.08  | 0 | 59.66 | WT  | WT  |
| FOLFOX-4 | 3.15 | 2.84 | 3.31 | 2.88 | 2.12 | 1.94 | 1.15  | 0 | 77.37 | WT  | NA  |
| FOLFOX-4 | 2.64 | 2.74 | 3.03 | 2.44 | 2.02 | 1.83 | -0.93 | 0 | 82.17 | MUT | NA  |
| FOLFOX-4 | 3.28 | 2.74 | 3.30 | 2.53 | 2.13 | 2.16 | 1.05  | 0 | 66.66 | WT  | MUT |
| FOLFOX-4 | 3.49 | 2.84 | 3.39 | 2.78 | 1.85 | 2.12 | 1.33  | 0 | 84.63 | WT  | MUT |
| FOLFOX-4 | 3.28 | 2.65 | 3.32 | 2.52 | 1.91 | 2.02 | 0.36  | 0 | 77.96 | WT  | NA  |
| FOLFOX-4 | 3.08 | 3.30 | 3.52 | 2.98 | 2.60 | 2.67 | 3.98  | 0 | 60.02 | WT  | MUT |
| FOLFOX-4 | 3.10 | 2.52 | 3.10 | 2.24 | 2.26 | 2.20 | 0.12  | 0 | 88.38 | WT  | NA  |
| FOLFOX-4 | 3.25 | 2.88 | 3.51 | 2.31 | 2.13 | 2.51 | 1.69  | 0 | 71.89 | WT  | MUT |
| FOLFOX-4 | 3.07 | 2.78 | 2.80 | 2.68 | 2.10 | 2.25 | 0.31  | 0 | 81.25 | WT  | NA  |
| FOLFOX-4 | 2.96 | 2.74 | 3.19 | 2.33 | 1.74 | 2.03 | -0.69 | 0 | 78.75 | WT  | WT  |
| FOLFOX-4 | 2.99 | 2.52 | 3.14 | 2.51 | 1.88 | 2.45 | -0.07 | 0 | 79.31 | WT  | NA  |
| FOLFOX-4 | 2.91 | 3.04 | 3.32 | 2.27 | 1.81 | 2.52 | 0.55  | 0 | 80.26 | WT  | MUT |
| FOLFOX-4 | 3.19 | 2.76 | 3.04 | 2.76 | 2.02 | 2.27 | 0.76  | 0 | 81.87 | WT  | NA  |
| FOLFOX-4 | 3.35 | 3.14 | 3.12 | 3.28 | 2.62 | 1.80 | 2.86  | 0 | 47.61 | WT  | MUT |

|          |      |      |      |      |      |      |       |   |       |     |     |
|----------|------|------|------|------|------|------|-------|---|-------|-----|-----|
| FOLFOX-4 | 2.91 | 3.04 | 3.32 | 2.27 | 1.81 | 2.52 | 0.55  | 0 | 80.72 | WT  | MUT |
| FOLFOX-4 | 2.97 | 2.70 | 3.12 | 2.57 | 1.88 | 2.26 | -0.01 | 1 | 32.59 | WT  | MUT |
| FOLFOX-4 | 2.96 | 2.72 | 3.25 | 2.61 | 1.86 | 1.80 | -0.36 | 0 | 81.58 | WT  | MUT |
| FOLFOX-4 | 3.31 | 2.83 | 3.31 | 2.65 | 2.24 | 2.19 | 1.60  | 0 | 67.84 | MUT | WT  |
| FOLFOX-4 | 2.79 | 2.63 | 2.97 | 2.51 | 1.94 | 1.77 | -1.12 | 0 | 76.22 | WT  | NA  |
| FOLFOX-4 | 3.23 | 2.95 | 3.53 | 3.09 | 1.75 | 2.75 | 2.28  | 0 | 72.71 | WT  | WT  |
| FOLFOX-4 | 3.41 | 3.09 | 3.43 | 3.05 | 2.32 | 2.06 | 2.81  | 0 | 79.18 | WT  | MUT |
| FOLFOX-4 | 2.87 | 2.73 | 3.36 | 2.84 | 1.96 | 2.09 | 0.53  | 0 | 75.17 | WT  | NA  |
| FOLFOX-4 | 3.39 | 2.51 | 3.18 | 2.47 | 2.14 | 2.70 | 1.26  | 0 | 86.24 | WT  | MUT |
| FOLFOX-4 | 3.59 | 2.94 | 3.27 | 2.95 | 2.06 | 2.09 | 2.00  | 0 | 18.6  | WT  | WT  |
| FOLFOX-4 | 2.92 | 2.53 | 2.95 | 2.34 | 2.20 | 2.30 | -0.20 | 0 | 76.62 | WT  | NA  |
| FOLFOX-4 | 2.82 | 2.40 | 3.10 | 2.50 | 2.04 | 1.85 | -0.98 | 1 | 45.86 | WT  | NA  |
| FOLFOX-4 | 3.02 | 2.84 | 3.29 | 2.94 | 2.27 | 1.75 | 1.08  | 0 | 62.16 | WT  | NA  |
| FOLFOX-4 | 2.92 | 2.69 | 3.59 | 2.58 | 2.17 | 2.03 | 0.88  | 1 | 53.06 | WT  | WT  |
| FOLFOX-4 | 3.46 | 3.07 | 3.30 | 3.04 | 2.11 | 1.91 | 2.04  | 0 | 77.6  | WT  | WT  |
| FOLFOX-4 | 2.99 | 2.53 | 2.96 | 2.27 | 1.81 | 1.76 | -1.57 | 0 | 60.91 | WT  | MUT |
| FOLFOX-4 | 3.32 | 3.10 | 3.18 | 2.81 | 2.04 | 2.13 | 1.60  | 0 | 48.16 | WT  | WT  |
| FOLFOX-4 | 3.03 | 2.63 | 3.06 | 2.01 | 2.09 | 1.93 | -0.77 | 0 | 75.93 | WT  | MUT |
| FOLFOX-4 | 2.96 | 2.82 | 3.21 | 2.38 | 2.03 | 2.42 | 0.55  | 0 | 79.34 | WT  | MUT |
| FOLFOX-4 | 3.17 | 3.12 | 3.33 | 2.87 | 2.08 | 2.24 | 1.91  | 0 | 66.53 | MUT | WT  |
| FOLFOX-4 | 3.23 | 2.85 | 3.22 | 2.82 | 2.11 | 2.14 | 1.29  | 1 | 40.25 | WT  | WT  |
| FOLFOX-4 | 3.00 | 2.88 | 3.37 | 2.80 | 1.99 | 2.13 | 1.00  | 0 | 66.33 | WT  | NA  |
| FOLFOX-4 | 3.27 | 3.07 | 3.09 | 2.74 | 2.28 | 1.99 | 1.54  | 0 | 83.22 | WT  | MUT |
| FOLFOX-4 | 3.04 | 2.62 | 3.30 | 2.69 | 1.85 | 2.13 | 0.14  | 0 | 73.33 | WT  | NA  |
| FOLFOX-4 | 2.74 | 2.77 | 2.72 | 2.74 | 1.69 | 1.83 | -1.49 | 0 | 85.55 | WT  | NA  |
| FOLFOX-4 | 2.87 | 2.81 | 3.31 | 2.68 | 1.97 | 2.11 | 0.42  | 0 | 67.38 | WT  | MUT |
| FOLFOX-4 | 2.89 | 2.73 | 3.05 | 2.72 | 1.93 | 1.48 | -0.84 | 0 | 85.06 | WT  | MUT |
| FOLFOX-4 | 2.86 | 2.49 | 3.05 | 1.62 | 2.10 | 2.02 | -1.55 | 0 | 59.86 | WT  | WT  |
| FOLFOX-4 | 3.24 | 3.15 | 3.42 | 3.03 | 2.20 | 2.51 | 2.93  | 0 | 65.81 | WT  | MUT |
| FOLFOX-4 | 2.94 | 2.85 | 2.88 | 2.58 | 1.91 | 2.37 | 0.02  | 1 | 49.68 | WT  | MUT |
| FOLFOX-4 | 2.74 | 2.72 | 2.81 | 1.93 | 1.98 | 2.20 | -1.39 | 0 | 67.48 | WT  | NA  |
| FOLFOX-4 | 3.07 | 2.89 | 3.35 | 2.78 | 1.93 | 1.78 | 0.51  | 0 | 76.78 | WT  | NA  |
| FOLFOX-4 | 2.69 | 2.57 | 3.19 | 2.63 | 1.83 | 1.84 | -1.02 | 0 | 80.39 | WT  | NA  |
| FOLFOX-4 | 2.88 | 2.56 | 3.16 | 1.52 | 1.88 | 2.12 | -1.67 | 0 | 83.78 | WT  | WT  |
| FOLFOX-4 | 2.83 | 3.05 | 2.95 | 2.88 | 2.16 | 2.40 | 1.13  | 0 | 84.14 | WT  | NA  |
| FOLFOX-4 | 3.29 | 2.67 | 3.30 | 2.83 | 2.35 | 2.06 | 1.59  | 0 | 78.49 | MUT | WT  |
| FOLFOX-4 | 3.10 | 2.59 | 3.15 | 1.95 | 1.96 | 2.53 | -0.21 | 0 | 68.47 | WT  | MUT |
| FOLFOX-4 | 3.28 | 2.58 | 3.19 | 2.48 | 2.08 | 2.43 | 0.81  | 0 | 60.16 | WT  | NA  |
| FOLFOX-4 | 3.36 | 2.69 | 3.40 | 2.00 | 2.09 | 2.57 | 0.99  | 0 | 59.96 | WT  | MUT |
| FOLFOX-4 | 3.10 | 2.89 | 3.57 | 2.79 | 1.99 | 2.36 | 1.73  | 0 | 78.16 | WT  | NA  |
| FOLFOX-4 | 3.05 | 2.48 | 3.25 | 3.11 | 2.00 | 1.61 | 0.04  | 0 | 83.22 | WT  | NA  |
| FOLFOX-4 | 3.14 | 2.88 | 3.13 | 2.88 | 2.21 | 1.91 | 1.09  | 0 | 61.7  | WT  | MUT |
| FOLFOX-4 | 2.62 | 2.44 | 2.94 | 2.12 | 1.56 | 2.21 | -2.36 | 1 | 52.9  | WT  | MUT |
| FOLFOX-4 | 2.73 | 2.33 | 3.05 | 1.99 | 1.81 | 1.85 | -2.31 | 0 | 83.42 | WT  | WT  |
| FOLFOX-4 | 2.60 | 2.53 | 2.77 | 2.40 | 1.78 | 1.45 | -2.67 | 0 | 56.34 | WT  | NA  |
| FOLFOX-4 | 2.60 | 2.07 | 2.59 | 1.99 | 1.72 | 1.63 | -3.98 | 0 | 79.84 | WT  | NA  |

|                      |      |      |      |      |      |      |       |   |       |     |     |
|----------------------|------|------|------|------|------|------|-------|---|-------|-----|-----|
| FOLFOX-4+Bevacizumab | 2.91 | 3.04 | 3.32 | 2.27 | 1.81 | 2.52 | 0.55  | 0 | 80.39 | WT  | WT  |
| FOLFOX-4+Bevacizumab | 3.10 | 2.77 | 3.22 | 2.64 | 1.88 | 2.06 | 0.24  | 0 | 72.02 | WT  | WT  |
| FOLFOX-4+Bevacizumab | 2.69 | 2.27 | 2.94 | 2.05 | 2.00 | 2.51 | -1.40 | 0 | 79.77 | MUT | NA  |
| FOLFOX-4+Bevacizumab | 3.05 | 2.52 | 3.38 | 2.34 | 2.10 | 2.12 | 0.18  | 0 | 68.4  | WT  | WT  |
| FOLFOX-4+Bevacizumab | 3.07 | 3.15 | 3.21 | 2.76 | 1.90 | 2.43 | 1.40  | 0 | 81.08 | MUT | WT  |
| FOLFOX-4+Bevacizumab | 3.08 | 2.73 | 3.37 | 2.63 | 2.05 | 2.13 | 0.77  | 0 | 76.75 | WT  | WT  |
| FOLFOX-4+Bevacizumab | 3.15 | 2.79 | 3.23 | 2.89 | 2.16 | 2.14 | 1.30  | 0 | 62.32 | WT  | MUT |
| FOLFOX-4+Bevacizumab | 3.00 | 2.94 | 3.05 | 2.62 | 1.98 | 1.97 | 0.20  | 0 | 60.58 | WT  | MUT |
| FOLFOX-4+Bevacizumab | 2.96 | 2.93 | 3.16 | 2.61 | 1.62 | 2.67 | 0.43  | 0 | 84.3  | WT  | MUT |
| FOLFOX-4+Bevacizumab | 3.09 | 2.90 | 3.15 | 2.83 | 2.10 | 2.09 | 1.02  | 0 | 80.99 | WT  | MUT |
| FOLFOX-4+Bevacizumab | 2.91 | 2.61 | 2.94 | 2.67 | 2.04 | 1.76 | -0.66 | 0 | 81.77 | WT  | MUT |
| FOLFOX-4+Bevacizumab | 3.40 | 3.12 | 3.31 | 2.90 | 2.12 | 2.79 | 2.98  | 0 | 60.32 | WT  | MUT |
| FOLFOX-4+Bevacizumab | 2.92 | 3.04 | 2.97 | 2.92 | 1.95 | 1.65 | 0.04  | 0 | 62.95 | WT  | NA  |
| FOLFOX-4+Bevacizumab | 2.99 | 2.81 | 3.20 | 2.24 | 1.71 | 2.21 | -0.48 | 0 | 87.39 | WT  | WT  |
| FOLFOX-4+Bevacizumab | 3.22 | 2.60 | 3.20 | 2.78 | 2.17 | 1.62 | 0.31  | 0 | 43.73 | WT  | MUT |
| FOLFOX-4+Bevacizumab | 3.38 | 2.81 | 3.15 | 2.65 | 2.03 | 2.34 | 1.22  | 0 | 49.05 | WT  | MUT |
| FOLFOX-4+Bevacizumab | 3.03 | 2.85 | 3.39 | 2.81 | 1.82 | 1.90 | 0.42  | 0 | 76.91 | WT  | WT  |
| FOLFOX-4+Bevacizumab | 3.22 | 2.61 | 3.29 | 2.63 | 2.15 | 2.15 | 0.91  | 0 | 73.2  | WT  | MUT |
| FOLFOX-4+Bevacizumab | 3.17 | 2.96 | 3.10 | 2.76 | 2.37 | 2.29 | 1.84  | 0 | 67.45 | NA  | WT  |
| FOLFOX-4+Bevacizumab | 3.09 | 2.69 | 3.63 | 2.57 | 1.84 | 1.93 | 0.43  | 0 | 84.44 | WT  | NA  |
| FOLFOX-4+Bevacizumab | 3.01 | 2.37 | 2.83 | 2.00 | 2.11 | 2.11 | -1.30 | 0 | 65.15 | WT  | NA  |
| FOLFOX-4+Bevacizumab | 3.29 | 2.40 | 3.07 | 2.50 | 2.17 | 2.08 | 0.14  | 0 | 61.63 | MUT | NA  |
| FOLFOX-4+Bevacizumab | 3.32 | 2.72 | 3.20 | 2.68 | 2.26 | 2.62 | 1.90  | 0 | 79.44 | WT  | MUT |
| FOLFOX-4+Bevacizumab | 2.82 | 2.66 | 3.18 | 2.13 | 1.91 | 2.34 | -0.54 | 0 | 66.79 | WT  | MUT |
| FOLFOX-4+Bevacizumab | 3.21 | 2.76 | 3.31 | 2.64 | 2.05 | 2.10 | 0.91  | 0 | 78.52 | WT  | MUT |
| FOLFOX-4+Bevacizumab | 3.28 | 2.72 | 3.20 | 2.69 | 2.05 | 2.56 | 1.39  | 0 | 74.58 | WT  | MUT |
| FOLFOX-4+Bevacizumab | 2.96 | 2.86 | 3.54 | 2.73 | 1.85 | 2.18 | 0.87  | 0 | 77.93 | WT  | WT  |
| FOLFOX-4+Bevacizumab | 3.28 | 2.78 | 3.13 | 2.87 | 2.16 | 1.89 | 0.98  | 0 | 85.03 | WT  | MUT |
| FOLFOX-4+Bevacizumab | 3.12 | 2.76 | 3.07 | 2.16 | 1.91 | 2.13 | -0.39 | 0 | 79.93 | WT  | MUT |
| FOLFOX-4+Bevacizumab | 3.01 | 2.89 | 3.06 | 2.83 | 2.16 | 2.05 | 0.82  | 0 | 84.24 | WT  | MUT |
| FOLFOX-4+Bevacizumab | 2.65 | 2.64 | 3.06 | 2.64 | 1.86 | 1.75 | -1.20 | 0 | 80.72 | WT  | NA  |
| FOLFOX-4+Bevacizumab | 3.33 | 2.90 | 3.44 | 2.62 | 2.25 | 2.37 | 2.13  | 0 | 67.15 | WT  | MUT |
| FOLFOX-4+Bevacizumab | 3.13 | 3.19 | 3.48 | 2.94 | 2.08 | 1.84 | 1.79  | 0 | 77.63 | WT  | WT  |
| FOLFOX-4+Bevacizumab | 3.28 | 2.63 | 3.15 | 2.23 | 2.09 | 1.88 | -0.12 | 0 | 81.54 | WT  | MUT |
| FOLFOX-4+Bevacizumab | 2.81 | 2.66 | 3.15 | 2.64 | 1.80 | 1.97 | -0.66 | 0 | 75.89 | WT  | NA  |
| FOLFOX-4+Bevacizumab | 2.99 | 2.64 | 3.24 | 2.85 | 1.89 | 2.05 | 0.20  | 0 | 83.94 | WT  | NA  |
| FOLFOX-4+Bevacizumab | 3.24 | 2.88 | 3.07 | 2.79 | 2.12 | 2.28 | 1.31  | 0 | 58.41 | WT  | MUT |
| FOLFOX-4+Bevacizumab | 2.91 | 3.04 | 3.32 | 2.27 | 1.81 | 2.52 | 0.55  | 0 | 80.49 | WT  | NA  |
| FOLFOX-4+Bevacizumab | 3.30 | 2.61 | 3.09 | 2.23 | 2.19 | 2.67 | 0.93  | 0 | 66.46 | WT  | MUT |
| FOLFOX-4+Bevacizumab | 3.15 | 2.56 | 3.19 | 2.05 | 1.93 | 2.39 | -0.22 | 0 | 74.02 | WT  | MUT |
| FOLFOX-4+Bevacizumab | 3.37 | 2.67 | 3.63 | 2.30 | 2.58 | 2.65 | 2.73  | 0 | 81.91 | WT  | WT  |
| FOLFOX-4+Bevacizumab | 2.91 | 3.04 | 3.32 | 2.27 | 1.81 | 2.52 | 0.55  | 0 | 78.52 | WT  | MUT |
| FOLFOX-4+Bevacizumab | 3.87 | 3.09 | 2.68 | 2.63 | 2.68 | 2.80 | 3.37  | 0 | 80.3  | WT  | MUT |
| FOLFOX-4+Bevacizumab | 2.92 | 2.28 | 3.05 | 1.98 | 1.82 | 2.23 | -1.67 | 0 | 88.15 | WT  | MUT |
| FOLFOX-4+Bevacizumab | 2.61 | 2.41 | 2.93 | 1.76 | 1.88 | 1.90 | -2.60 | 0 | 48.62 | WT  | NA  |
| FOLFOX-4+Bevacizumab | 3.13 | 3.05 | 3.29 | 2.50 | 2.34 | 2.85 | 2.50  | 0 | 79.93 | WT  | MUT |

|                      |      |      |      |      |      |      |       |   |       |     |     |
|----------------------|------|------|------|------|------|------|-------|---|-------|-----|-----|
| FOLFOX-4+Bevacizumab | 2.60 | 2.43 | 3.08 | 2.41 | 1.68 | 1.81 | -2.07 | 0 | 77.17 | WT  | NA  |
| FOLFOX-4+Bevacizumab | 3.02 | 2.99 | 3.07 | 2.39 | 2.20 | 2.62 | 1.24  | 0 | 61.54 | WT  | MUT |
| FOLFOX-4+Bevacizumab | 3.27 | 3.11 | 3.23 | 2.80 | 1.97 | 2.34 | 1.72  | 0 | 79.9  | WT  | MUT |
| FOLFOX-4+Bevacizumab | 2.87 | 2.70 | 3.19 | 2.64 | 2.02 | 1.79 | -0.26 | 0 | 48.82 | WT  | NA  |
| FOLFOX-4+Bevacizumab | 3.13 | 2.96 | 3.27 | 2.92 | 1.99 | 1.78 | 0.85  | 0 | 78.42 | WT  | NA  |
| FOLFOX-4+Bevacizumab | 3.12 | 2.93 | 3.18 | 2.87 | 2.17 | 1.91 | 1.11  | 0 | 82.17 | WT  | NA  |
| FOLFOX-4+Bevacizumab | 3.06 | 3.06 | 3.15 | 2.91 | 2.02 | 1.88 | 0.92  | 0 | 66.53 | WT  | MUT |
| FOLFOX-4+Bevacizumab | 2.82 | 2.70 | 3.29 | 2.73 | 2.00 | 2.11 | 0.28  | 0 | 82.2  | WT  | NA  |
| FOLFOX-4+Bevacizumab | 2.90 | 3.04 | 2.93 | 2.58 | 1.95 | 2.57 | 0.63  | 1 | 80.62 | WT  | MUT |
| FOLFOX-4+Bevacizumab | 2.61 | 2.68 | 3.25 | 2.60 | 1.69 | 1.66 | -1.37 | 0 | 64.95 | WT  | NA  |
| FOLFOX-4+Bevacizumab | 2.86 | 2.77 | 3.51 | 2.78 | 1.91 | 1.85 | 0.35  | 1 | 68.76 | WT  | NA  |
| FOLFOX-4+Bevacizumab | 2.89 | 2.84 | 3.09 | 2.39 | 2.01 | 2.12 | -0.10 | 0 | 75.73 | WT  | NA  |
| FOLFOX-4+Bevacizumab | 3.23 | 2.86 | 3.11 | 2.24 | 2.10 | 2.43 | 0.80  | 0 | 68.99 | WT  | MUT |
| FOLFOX-4+Bevacizumab | 3.01 | 2.54 | 3.18 | 2.25 | 1.94 | 2.43 | -0.15 | 0 | 68.37 | WT  | NA  |
| FOLFOX-4+Bevacizumab | 2.80 | 2.62 | 3.04 | 2.67 | 1.99 | 1.72 | -0.81 | 0 | 79.93 | WT  | NA  |
| FOLFOX-4+Bevacizumab | 3.19 | 2.76 | 3.48 | 2.38 | 2.07 | 2.08 | 0.85  | 0 | 87.13 | WT  | MUT |
| FOLFOX-4+Bevacizumab | 3.22 | 2.56 | 3.17 | 2.40 | 2.14 | 1.94 | 0.12  | 0 | 73.3  | WT  | NA  |
| FOLFOX-4+Bevacizumab | 3.26 | 2.98 | 3.38 | 2.80 | 1.93 | 2.67 | 2.05  | 0 | 72.8  | WT  | MUT |
| FOLFOX-4+Bevacizumab | 3.24 | 2.34 | 3.33 | 2.25 | 1.92 | 2.21 | -0.23 | 0 | 63.87 | MUT | WT  |
| FOLFOX-4+Bevacizumab | 3.12 | 2.89 | 3.46 | 2.91 | 1.96 | 2.09 | 1.33  | 0 | 72.18 | WT  | WT  |
| FOLFOX-4+Bevacizumab | 2.89 | 2.88 | 3.03 | 2.63 | 1.93 | 1.89 | -0.27 | 0 | 54.54 | WT  | MUT |
| FOLFOX-4+Bevacizumab | 3.03 | 3.15 | 3.35 | 2.89 | 2.03 | 2.73 | 2.33  | 1 | 34.56 | WT  | MUT |
| FOLFOX-4+Bevacizumab | 3.14 | 2.85 | 3.62 | 2.91 | 1.95 | 2.06 | 1.48  | 0 | 84.21 | WT  | WT  |
| FOLFOX-4+Bevacizumab | 2.99 | 2.56 | 3.22 | 2.65 | 2.17 | 1.93 | 0.21  | 0 | 72.25 | WT  | NA  |
| FOLFOX-4+Bevacizumab | 3.19 | 3.02 | 3.27 | 2.72 | 2.05 | 2.18 | 1.39  | 1 | 46.42 | WT  | MUT |
| FOLFOX-4+Bevacizumab | 3.00 | 3.08 | 3.37 | 3.02 | 2.33 | 2.44 | 2.59  | 0 | 67.19 | WT  | MUT |
| FOLFOX-4+Bevacizumab | 3.06 | 2.57 | 3.18 | 2.43 | 2.13 | 2.00 | 0.00  | 0 | 69.22 | WT  | MUT |
| FOLFOX-4+Bevacizumab | 2.73 | 2.84 | 3.21 | 2.83 | 1.86 | 2.26 | 0.29  | 0 | 85.75 | WT  | NA  |
| FOLFOX-4+Bevacizumab | 3.10 | 2.93 | 3.55 | 2.72 | 2.23 | 2.65 | 2.47  | 0 | 78.88 | WT  | MUT |
| FOLFOX-4+Bevacizumab | 3.26 | 3.07 | 3.09 | 2.93 | 2.32 | 2.52 | 2.46  | 0 | 86.57 | WT  | MUT |
| FOLFOX-4+Bevacizumab | 2.76 | 2.95 | 3.20 | 2.53 | 2.06 | 1.93 | 0.10  | 0 | 61.14 | WT  | NA  |
| FOLFOX-4+Bevacizumab | 3.17 | 3.28 | 3.27 | 2.92 | 2.37 | 2.13 | 2.55  | 0 | 84.99 | WT  | NA  |
| FOLFOX-4+Bevacizumab | 2.91 | 3.04 | 3.32 | 2.27 | 1.81 | 2.52 | 0.55  | 0 | 79.74 | WT  | MUT |
| FOLFOX-4+Bevacizumab | 2.96 | 2.69 | 3.03 | 2.25 | 2.12 | 2.47 | 0.16  | 0 | 71.79 | WT  | WT  |
| FOLFOX-4+Bevacizumab | 3.27 | 2.98 | 3.32 | 2.80 | 2.09 | 2.38 | 1.92  | 0 | 84.21 | WT  | MUT |
| FOLFOX-4+Bevacizumab | 2.76 | 2.58 | 2.97 | 2.50 | 1.84 | 1.61 | -1.63 | 0 | 78.52 | WT  | WT  |
| FOLFOX-4+Bevacizumab | 3.32 | 2.84 | 3.32 | 2.42 | 2.09 | 2.64 | 1.65  | 0 | 72.15 | WT  | NA  |
| FOLFOX-4+Bevacizumab | 3.03 | 2.63 | 3.48 | 2.65 | 1.86 | 1.94 | 0.17  | 0 | 62.32 | WT  | WT  |
| FOLFOX-4+Bevacizumab | 3.01 | 2.81 | 3.27 | 2.40 | 1.99 | 2.00 | 0.12  | 0 | 61.54 | WT  | MUT |
| FOLFOX-4+Bevacizumab | 3.13 | 2.78 | 3.01 | 2.57 | 2.16 | 1.76 | 0.09  | 0 | 82.04 | WT  | MUT |
| FOLFOX-4+Bevacizumab | 2.62 | 2.53 | 3.04 | 2.54 | 1.97 | 1.67 | -1.43 | 0 | 66.89 | WT  | NA  |
| FOLFOX-4+Bevacizumab | 3.32 | 2.94 | 2.97 | 2.41 | 2.13 | 2.01 | 0.57  | 1 | 42.64 | WT  | MUT |
| FOLFOX-4+Bevacizumab | 2.99 | 2.69 | 3.01 | 3.01 | 1.97 | 1.92 | 0.13  | 0 | 84.01 | WT  | WT  |
| FOLFOX-4+Bevacizumab | 2.76 | 2.58 | 2.79 | 2.44 | 1.93 | 1.87 | -1.50 | 0 | 72.21 | WT  | NA  |
| FOLFOX-4+Bevacizumab | 3.17 | 2.96 | 3.07 | 2.82 | 2.08 | 1.94 | 0.86  | 0 | 74.91 | WT  | MUT |
| FOLFOX-4+Bevacizumab | 2.91 | 3.04 | 3.32 | 2.27 | 1.81 | 2.52 | 0.55  | 0 | 75.33 | WT  | NA  |

|                      |      |      |      |      |      |      |       |   |       |     |     |
|----------------------|------|------|------|------|------|------|-------|---|-------|-----|-----|
| FOLFOX-4+Bevacizumab | 2.69 | 2.57 | 2.95 | 2.31 | 1.86 | 1.62 | -1.94 | 0 | 72.61 | WT  | MUT |
| FOLFOX-4+Bevacizumab | 3.08 | 2.65 | 3.47 | 2.48 | 2.22 | 2.21 | 1.06  | 0 | 66.37 | WT  | NA  |
| FOLFOX-4+Bevacizumab | 2.97 | 2.73 | 2.94 | 2.80 | 2.02 | 2.35 | 0.43  | 0 | 62.59 | WT  | NA  |
| FOLFOX-4+Bevacizumab | 3.23 | 2.88 | 3.25 | 2.36 | 2.21 | 1.94 | 0.81  | 0 | 60.25 | WT  | MUT |
| FOLFOX-4+Bevacizumab | 3.25 | 3.08 | 3.42 | 2.86 | 2.16 | 2.03 | 2.00  | 0 | 68.17 | WT  | NA  |
| FOLFOX-4+Bevacizumab | 2.82 | 2.69 | 3.28 | 2.50 | 2.03 | 1.97 | -0.13 | 0 | 72.02 | WT  | MUT |
| FOLFOX-4+Bevacizumab | 3.33 | 2.77 | 3.30 | 2.45 | 1.86 | 2.26 | 0.69  | 0 | 74.55 | WT  | MUT |
| FOLFOX-4+Bevacizumab | 2.77 | 3.09 | 3.09 | 3.00 | 1.89 | 1.80 | 0.23  | 0 | 76.75 | WT  | NA  |
| FOLFOX-4+Bevacizumab | 3.17 | 2.97 | 3.22 | 2.71 | 2.08 | 1.74 | 0.75  | 0 | 83.25 | WT  | NA  |
| FOLFOX-4+Bevacizumab | 2.89 | 2.79 | 3.39 | 2.57 | 1.74 | 1.65 | -0.57 | 0 | 78.19 | WT  | NA  |
| FOLFOX-4+Bevacizumab | 2.53 | 2.67 | 2.85 | 2.26 | 1.76 | 1.85 | -2.16 | 0 | 78.55 | NA  | NA  |
| FOLFOX-4+Bevacizumab | 2.86 | 2.38 | 3.12 | 2.49 | 2.02 | 1.69 | -1.17 | 0 | 67.38 | WT  | NA  |
| FOLFOX-4+Bevacizumab | 2.85 | 2.45 | 3.17 | 2.57 | 1.90 | 2.24 | -0.46 | 0 | 69.26 | WT  | NA  |
| FOLFOX-4+Bevacizumab | 2.86 | 2.71 | 3.36 | 2.51 | 1.69 | 2.05 | -0.46 | 0 | 81.12 | WT  | WT  |
| FOLFOX-4+Bevacizumab | 3.53 | 2.88 | 2.62 | 2.91 | 2.21 | 1.71 | 0.63  | 0 | 68.76 | WT  | MUT |
| FOLFOX-4+Bevacizumab | 2.82 | 2.85 | 3.06 | 2.63 | 1.89 | 1.96 | -0.36 | 0 | 80    | WT  | NA  |
| FOLFOX-4+Bevacizumab | 3.22 | 2.77 | 3.42 | 2.64 | 2.15 | 1.85 | 0.97  | 0 | 79.87 | WT  | MUT |
| FOLFOX-4+Bevacizumab | 2.64 | 2.31 | 2.81 | 2.38 | 1.78 | 1.83 | -2.43 | 0 | 78.16 | WT  | MUT |
| FOLFOX-4+Bevacizumab | 2.86 | 2.95 | 2.98 | 2.68 | 2.03 | 1.72 | -0.21 | 0 | 65.97 | WT  | NA  |
| FOLFOX-4+Bevacizumab | 3.06 | 2.77 | 3.08 | 2.29 | 2.22 | 2.29 | 0.52  | 0 | 79.74 | MUT | NA  |
| FOLFOX-4+Bevacizumab | 3.29 | 2.93 | 3.15 | 2.60 | 2.11 | 2.67 | 1.78  | 1 | 23.72 | WT  | WT  |
| FOLFOX-4+Bevacizumab | 2.85 | 2.58 | 3.10 | 2.70 | 2.03 | 1.85 | -0.44 | 0 | 77.24 | WT  | WT  |
| FOLFOX-4+Bevacizumab | 3.31 | 3.28 | 3.29 | 2.82 | 2.08 | 1.77 | 1.66  | 0 | 65.61 | WT  | MUT |
| FOLFOX-4+Bevacizumab | 3.16 | 2.88 | 3.50 | 2.92 | 1.89 | 1.80 | 0.95  | 0 | 72.05 | WT  | WT  |
| FOLFOX-4+Bevacizumab | 3.26 | 2.67 | 3.17 | 2.47 | 2.19 | 2.44 | 1.12  | 0 | 65.45 | WT  | NA  |
| FOLFOX-4+Bevacizumab | 2.99 | 2.83 | 2.86 | 2.25 | 1.92 | 2.05 | -0.73 | 0 | 81.25 | MUT | WT  |
| FOLFOX-4+Bevacizumab | 3.06 | 2.69 | 2.97 | 2.62 | 1.80 | 2.35 | -0.10 | 0 | 79.84 | WT  | MUT |
| FOLFOX-4+Bevacizumab | 3.11 | 2.61 | 3.16 | 2.21 | 1.73 | 2.28 | -0.57 | 0 | 84.47 | NA  | NA  |
| FOLFOX-4+Bevacizumab | 2.99 | 2.70 | 3.16 | 2.53 | 2.14 | 2.56 | 0.86  | 0 | 59.99 | WT  | WT  |
| FOLFOX-4+Bevacizumab | 2.99 | 2.56 | 2.97 | 1.83 | 1.95 | 2.08 | -1.37 | 0 | 66.69 | WT  | NA  |
| FOLFOX-4+Bevacizumab | 3.35 | 2.53 | 2.99 | 2.42 | 2.06 | 2.04 | -0.05 | 0 | 66.1  | WT  | MUT |
| FOLFOX-4+Bevacizumab | 3.03 | 2.96 | 3.03 | 2.40 | 2.20 | 2.40 | 0.91  | 0 | 62.26 | WT  | MUT |
| FOLFOX-4+Bevacizumab | 2.75 | 2.64 | 3.21 | 2.50 | 1.83 | 1.78 | -1.02 | 0 | 80.33 | WT  | WT  |
| FOLFOX-4+Bevacizumab | 3.07 | 2.73 | 3.19 | 1.74 | 2.01 | 2.10 | -0.63 | 0 | 83.98 | WT  | WT  |
| FOLFOX-4+Bevacizumab | 2.60 | 2.52 | 3.08 | 2.16 | 1.51 | 1.83 | -2.57 | 0 | 60.42 | WT  | NA  |
| FOLFOX-4+Bevacizumab | 3.16 | 2.82 | 3.57 | 2.54 | 2.25 | 2.69 | 2.31  | 0 | 54.08 | WT  | WT  |
| FOLFOX-4+Bevacizumab | 3.06 | 2.57 | 3.04 | 2.39 | 2.42 | 2.28 | 0.64  | 1 | 22.11 | NA  | WT  |
| FOLFOX-4+Bevacizumab | 2.96 | 2.82 | 2.92 | 2.52 | 2.00 | 2.60 | 0.43  | 0 | 78.69 | WT  | NA  |
| FOLFOX-4+Bevacizumab | 2.78 | 2.38 | 2.70 | 2.45 | 2.06 | 1.84 | -1.67 | 0 | 82.4  | WT  | NA  |
| FOLFOX-4+Bevacizumab | 3.20 | 3.01 | 3.19 | 1.95 | 1.94 | 2.47 | 0.51  | 0 | 59.7  | WT  | MUT |
| FOLFOX-4+Bevacizumab | 2.75 | 2.57 | 3.10 | 2.43 | 1.77 | 1.94 | -1.28 | 0 | 74.78 | WT  | NA  |
| FOLFOX-4+Bevacizumab | 3.68 | 3.01 | 3.40 | 2.51 | 2.24 | 2.46 | 2.69  | 1 | 34.23 | NA  | WT  |
| FOLFOX-4+Bevacizumab | 2.83 | 2.51 | 2.90 | 2.26 | 2.14 | 1.85 | -1.17 | 0 | 64.16 | WT  | NA  |
| FOLFOX-4+Bevacizumab | 3.13 | 2.84 | 3.57 | 3.05 | 2.06 | 1.96 | 1.63  | 1 | 67.38 | WT  | MUT |
| FOLFOX-4+Bevacizumab | 3.63 | 3.20 | 2.97 | 3.08 | 2.23 | 2.55 | 3.03  | 0 | 81.18 | WT  | MUT |
| FOLFOX-4+Bevacizumab | 2.97 | 2.61 | 3.41 | 2.37 | 2.08 | 1.93 | 0.04  | 0 | 61.57 | WT  | NA  |

|                      |      |      |      |      |      |      |       |   |       |     |     |
|----------------------|------|------|------|------|------|------|-------|---|-------|-----|-----|
| FOLFOX-4+Bevacizumab | 2.71 | 2.63 | 2.59 | 2.57 | 1.84 | 1.59 | -2.15 | 0 | 76.88 | WT  | NA  |
| FOLFOX-4+Bevacizumab | 2.82 | 2.51 | 2.54 | 2.51 | 1.98 | 2.26 | -1.25 | 0 | 80.3  | WT  | MUT |
| FOLFOX-4+Bevacizumab | 3.08 | 2.89 | 3.33 | 2.24 | 2.34 | 2.00 | 0.91  | 0 | 60.94 | MUT | WT  |
| FOLFOX-4+Bevacizumab | 2.52 | 2.49 | 2.85 | 1.74 | 1.76 | 2.14 | -2.68 | 0 | 70.21 | WT  | WT  |
| FOLFOX-4+Bevacizumab | 2.68 | 2.64 | 3.08 | 2.36 | 1.75 | 1.83 | -1.58 | 0 | 85.26 | WT  | NA  |
| FOLFOX-4+Bevacizumab | 3.00 | 2.61 | 2.79 | 2.34 | 1.92 | 2.36 | -0.67 | 0 | 77.11 | WT  | MUT |
| FOLFOX-4+Bevacizumab | 3.17 | 2.69 | 2.95 | 2.35 | 1.90 | 2.58 | 0.17  | 0 | 65.81 | WT  | MUT |
| FOLFOX-4+Bevacizumab | 3.19 | 2.15 | 3.53 | 2.57 | 2.27 | 2.54 | 1.13  | 0 | 79.21 | MUT | NA  |
| FOLFOX-4+Bevacizumab | 2.34 | 2.46 | 2.82 | 2.12 | 1.60 | 1.87 | -3.21 | 0 | 60.71 | WT  | NA  |
| FOLFOX-4+Bevacizumab | 2.70 | 2.41 | 2.86 | 2.35 | 1.74 | 2.06 | -1.97 | 0 | 78    | WT  | MUT |
| FOLFOX-4+Bevacizumab | 3.16 | 2.49 | 2.90 | 2.08 | 1.93 | 1.92 | -1.30 | 0 | 79.77 | WT  | MUT |
| FOLFOX-4+Bevacizumab | 3.28 | 3.04 | 3.44 | 2.98 | 2.15 | 1.80 | 1.85  | 0 | 76.19 | WT  | MUT |
| FOLFOX-4+Bevacizumab | 2.70 | 2.68 | 2.91 | 2.61 | 1.92 | 1.54 | -1.44 | 0 | 80.03 | WT  | MUT |
| FOLFOX-4+Bevacizumab | 3.07 | 3.08 | 3.20 | 3.21 | 2.15 | 1.82 | 1.55  | 0 | 79.38 | WT  | WT  |
| FOLFOX-4+Bevacizumab | 3.26 | 2.73 | 3.10 | 2.48 | 2.13 | 2.39 | 0.94  | 0 | 76.39 | WT  | MUT |
| FOLFOX-4+Bevacizumab | 2.73 | 2.46 | 2.89 | 2.12 | 1.77 | 2.26 | -1.78 | 0 | 74.38 | WT  | MUT |
| FOLFOX-4+Bevacizumab | 2.91 | 2.76 | 3.28 | 2.78 | 2.05 | 1.56 | -0.04 | 0 | 83.61 | WT  | WT  |
| FOLFOX-4+Bevacizumab | 3.01 | 2.92 | 3.29 | 2.78 | 2.11 | 2.08 | 1.10  | 0 | 46.16 | WT  | MUT |
| FOLFOX-4+Bevacizumab | 3.03 | 3.10 | 3.33 | 2.53 | 2.17 | 2.85 | 2.20  | 1 | 65.18 | MUT | WT  |
| FOLFOX-4+Bevacizumab | 2.99 | 2.34 | 3.26 | 2.24 | 2.13 | 2.46 | 0.01  | 0 | 84.5  | WT  | MUT |
| FOLFOX-4+Bevacizumab | 3.15 | 2.25 | 3.30 | 2.57 | 2.04 | 1.97 | -0.23 | 0 | 78.39 | WT  | MUT |
| FOLFOX-4+Bevacizumab | 2.76 | 2.49 | 3.33 | 2.47 | 1.65 | 2.14 | -0.99 | 0 | 79.18 | WT  | MUT |
| FOLFOX-4+Bevacizumab | 3.41 | 2.86 | 3.45 | 3.13 | 2.35 | 1.85 | 2.39  | 0 | 82.4  | WT  | MUT |
| FOLFOX-4+Bevacizumab | 2.83 | 2.72 | 2.82 | 2.34 | 1.83 | 2.16 | -1.08 | 0 | 77.6  | WT  | MUT |
| FOLFOX-4+Bevacizumab | 3.32 | 2.49 | 2.91 | 2.22 | 2.16 | 2.06 | -0.29 | 0 | 82.07 | WT  | MUT |
| FOLFOX-4+Bevacizumab | 3.04 | 2.62 | 3.32 | 2.82 | 2.14 | 2.11 | 0.87  | 0 | 62.59 | WT  | NA  |
| FOLFOX-4+Bevacizumab | 2.77 | 2.66 | 3.27 | 2.61 | 1.95 | 1.97 | -0.29 | 0 | 82.17 | WT  | NA  |
| FOLFOX-4+Bevacizumab | 3.20 | 2.87 | 3.34 | 2.16 | 2.18 | 2.44 | 1.19  | 0 | 77.11 | WT  | MUT |
| FOLFOX-4+Bevacizumab | 3.06 | 2.65 | 2.99 | 1.90 | 2.01 | 2.17 | -0.79 | 0 | 66.1  | WT  | WT  |
| FOLFOX-4+Bevacizumab | 3.06 | 3.03 | 3.11 | 2.87 | 2.05 | 1.93 | 0.88  | 0 | 67.42 | MUT | NA  |
| FOLFOX-4+Bevacizumab | 3.19 | 2.79 | 3.20 | 2.65 | 2.05 | 1.98 | 0.62  | 0 | 77.86 | WT  | NA  |
| FOLFOX-4+Bevacizumab | 2.88 | 2.81 | 3.28 | 2.33 | 1.89 | 2.53 | 0.34  | 0 | 60.55 | WT  | MUT |
| FOLFOX-4+Bevacizumab | 3.12 | 2.86 | 3.31 | 2.73 | 1.94 | 2.03 | 0.77  | 0 | 71.89 | WT  | MUT |
| FOLFOX-4+Bevacizumab | 3.06 | 2.88 | 3.15 | 2.21 | 2.01 | 1.78 | -0.32 | 0 | 77.47 | WT  | NA  |
| FOLFOX-4+Bevacizumab | 2.85 | 2.86 | 3.27 | 2.43 | 1.78 | 2.21 | -0.13 | 0 | 77.9  | WT  | MUT |
| FOLFOX-4+Bevacizumab | 2.71 | 2.24 | 3.01 | 1.89 | 2.19 | 1.82 | -1.95 | 0 | 84.44 | WT  | NA  |
| FOLFOX-4+Bevacizumab | 3.34 | 2.51 | 3.09 | 2.28 | 1.98 | 2.55 | 0.37  | 0 | 80.33 | WT  | MUT |
| FOLFOX-4+Bevacizumab | 3.17 | 2.62 | 3.07 | 2.16 | 2.08 | 2.41 | 0.14  | 0 | 71.43 | WT  | MUT |
| FOLFOX-4+Bevacizumab | 3.19 | 2.93 | 3.06 | 2.28 | 2.28 | 2.39 | 1.15  | 0 | 85.52 | WT  | WT  |
| FOLFOX-4+Bevacizumab | 3.47 | 2.92 | 3.42 | 2.62 | 2.14 | 2.35 | 2.10  | 0 | 61.96 | WT  | MUT |
| FOLFOX-4+Bevacizumab | 3.11 | 2.93 | 3.35 | 2.63 | 2.17 | 2.04 | 1.24  | 0 | 72.54 | WT  | MUT |
| FOLFOX-4+Bevacizumab | 3.22 | 2.46 | 3.60 | 2.05 | 2.39 | 2.22 | 0.99  | 0 | 83.38 | MUT | WT  |
| FOLFOX-4+Bevacizumab | 2.73 | 2.68 | 3.10 | 2.53 | 1.86 | 1.93 | -0.87 | 0 | 68.34 | WT  | NA  |
| FOLFOX-4+Bevacizumab | 3.13 | 2.79 | 2.86 | 2.67 | 2.36 | 2.23 | 0.96  | 1 | 50.3  | MUT | WT  |
| FOLFOX-4+Bevacizumab | 3.10 | 2.90 | 3.93 | 2.77 | 2.69 | 2.06 | 3.21  | 0 | 74.81 | WT  | NA  |
| FOLFOX-4+Bevacizumab | 3.23 | 2.79 | 3.33 | 2.39 | 2.16 | 2.65 | 1.57  | 1 | 45.86 | WT  | MUT |

|                      |      |      |      |      |      |      |       |   |       |     |     |
|----------------------|------|------|------|------|------|------|-------|---|-------|-----|-----|
| FOLFOX-4+Bevacizumab | 3.19 | 2.51 | 3.58 | 2.75 | 1.69 | 1.67 | -0.18 | 0 | 82.37 | WT  | NA  |
| FOLFOX-4+Bevacizumab | 2.94 | 2.76 | 3.02 | 2.64 | 2.11 | 1.86 | -0.07 | 0 | 78.49 | MUT | NA  |
| FOLFOX-4+Bevacizumab | 2.98 | 2.84 | 3.37 | 2.53 | 2.03 | 1.93 | 0.42  | 0 | 60.71 | WT  | WT  |
| FOLFOX-4+Bevacizumab | 2.86 | 2.64 | 3.19 | 2.65 | 1.95 | 2.29 | 0.12  | 0 | 84.21 | WT  | NA  |
| FOLFOX-4+Bevacizumab | 3.17 | 3.12 | 3.35 | 2.78 | 2.05 | 2.55 | 2.16  | 0 | 72.94 | WT  | MUT |
| FOLFOX-4+Bevacizumab | 3.38 | 3.12 | 2.97 | 2.66 | 2.14 | 2.12 | 1.39  | 0 | 69.49 | WT  | WT  |
| FOLFOX-4+Bevacizumab | 2.94 | 2.57 | 3.12 | 1.89 | 1.93 | 2.77 | -0.33 | 0 | 70.37 | WT  | MUT |
| FOLFOX-4+Bevacizumab | 3.32 | 2.58 | 3.60 | 2.44 | 2.21 | 2.38 | 1.61  | 0 | 64.89 | WT  | WT  |
| FOLFOX-4+Bevacizumab | 3.19 | 2.58 | 3.38 | 2.24 | 1.98 | 2.07 | 0.05  | 0 | 82.43 | WT  | MUT |
| FOLFOX-4+Bevacizumab | 3.00 | 2.78 | 3.15 | 2.40 | 2.22 | 2.31 | 0.71  | 0 | 85.82 | WT  | WT  |
| FOLFOX-4+Bevacizumab | 3.03 | 2.58 | 3.32 | 2.71 | 2.03 | 2.10 | 0.43  | 0 | 77.8  | WT  | MUT |
| FOLFOX-4+Bevacizumab | 3.33 | 2.94 | 3.20 | 2.56 | 1.96 | 1.87 | 0.64  | 1 | 27.43 | WT  | MUT |
| FOLFOX-4+Bevacizumab | 3.12 | 2.58 | 2.87 | 2.52 | 2.10 | 2.03 | -0.29 | 0 | 60.98 | WT  | NA  |
| FOLFOX-4+Bevacizumab | 3.07 | 2.43 | 2.98 | 2.19 | 2.12 | 2.25 | -0.48 | 0 | 68.53 | WT  | WT  |
| FOLFOX-4+Bevacizumab | 3.21 | 2.64 | 2.97 | 2.18 | 2.26 | 2.32 | 0.33  | 0 | 63.74 | WT  | NA  |
| FOLFOX-4+Bevacizumab | 3.05 | 2.53 | 3.35 | 2.26 | 2.17 | 2.09 | 0.17  | 0 | 71.56 | WT  | MUT |
| FOLFOX-4+Bevacizumab | 3.02 | 2.81 | 3.16 | 2.48 | 1.93 | 2.76 | 0.88  | 1 | 76.19 | WT  | MUT |
| FOLFOX-4+Bevacizumab | 2.95 | 2.60 | 3.23 | 2.46 | 1.96 | 2.06 | -0.25 | 0 | 82.73 | WT  | NA  |
| FOLFOX-4+Bevacizumab | 3.14 | 2.85 | 3.36 | 2.78 | 2.04 | 2.18 | 1.27  | 0 | 60.16 | WT  | MUT |
| FOLFOX-4+Bevacizumab | 3.03 | 2.98 | 3.20 | 2.59 | 1.68 | 2.08 | 0.04  | 1 | 80.76 | WT  | NA  |
| FOLFOX-4+Bevacizumab | 3.38 | 2.29 | 3.17 | 2.23 | 1.99 | 2.36 | -0.07 | 1 | 30.09 | WT  | MUT |
| FOLFOX-4+Bevacizumab | 2.97 | 2.89 | 3.03 | 1.77 | 2.35 | 1.76 | -0.50 | 0 | 67.32 | NA  | WT  |
| FOLFOX-4+Bevacizumab | 3.15 | 2.56 | 3.32 | 2.52 | 1.90 | 1.82 | -0.23 | 0 | 75.07 | WT  | WT  |
| FOLFOX-4+Bevacizumab | 3.48 | 2.82 | 3.13 | 2.77 | 2.12 | 2.65 | 2.04  | 0 | 59.66 | WT  | MUT |
| FOLFOX-4+Bevacizumab | 3.68 | 2.89 | 3.28 | 2.83 | 2.26 | 2.42 | 2.68  | 0 | 63.11 | WT  | MUT |
| FOLFOX-4+Bevacizumab | 2.97 | 2.51 | 2.91 | 2.34 | 2.06 | 2.28 | -0.50 | 1 | 12.45 | WT  | WT  |
| FOLFOX-4+Bevacizumab | 3.44 | 2.77 | 3.36 | 2.63 | 2.20 | 2.48 | 2.04  | 1 | 75.47 | MUT | WT  |
| FOLFOX-4+Bevacizumab | 3.13 | 2.61 | 3.16 | 2.10 | 2.09 | 2.29 | 0.01  | 0 | 84.67 | WT  | NA  |
| FOLFOX-4+Bevacizumab | 3.21 | 3.01 | 3.45 | 2.51 | 2.29 | 2.46 | 2.23  | 0 | 60.19 | MUT | NA  |
| FOLFOX-4+Bevacizumab | 3.03 | 3.05 | 2.96 | 2.63 | 1.91 | 2.45 | 0.73  | 0 | 60.91 | WT  | NA  |
| FOLFOX-4+Bevacizumab | 3.57 | 2.83 | 3.32 | 2.87 | 2.28 | 2.12 | 2.24  | 0 | 29.34 | WT  | NA  |
| FOLFOX-4+Bevacizumab | 3.42 | 2.96 | 3.29 | 2.59 | 2.18 | 2.44 | 2.07  | 0 | 66.04 | WT  | MUT |
| FOLFOX-4+Bevacizumab | 3.04 | 2.52 | 3.30 | 2.60 | 2.15 | 2.00 | 0.32  | 0 | 60.25 | WT  | WT  |
| FOLFOX-4+Bevacizumab | 2.96 | 2.72 | 3.10 | 2.57 | 2.01 | 2.13 | 0.07  | 0 | 63.57 | WT  | WT  |
| FOLFOX-4+Bevacizumab | 3.26 | 2.76 | 3.29 | 2.45 | 2.05 | 2.03 | 0.63  | 0 | 2.79  | WT  | MUT |
| FOLFOX-4+Bevacizumab | 3.24 | 2.91 | 3.19 | 2.85 | 2.07 | 1.64 | 0.72  | 1 | 83.12 | WT  | MUT |
| FOLFOX-4+Bevacizumab | 3.22 | 2.58 | 2.82 | 2.11 | 2.30 | 2.18 | -0.11 | 1 | 1.15  | WT  | NA  |
| FOLFOX-4+Bevacizumab | 3.27 | 2.82 | 3.41 | 2.78 | 1.84 | 1.85 | 0.67  | 0 | 77.54 | WT  | MUT |
| FOLFOX-4+Bevacizumab | 3.50 | 2.82 | 3.27 | 2.75 | 2.63 | 1.99 | 2.42  | 1 | 42.81 | MUT | NA  |
| FOLFOX-4+Bevacizumab | 2.87 | 2.11 | 2.94 | 2.34 | 1.90 | 1.96 | -1.88 | 0 | 60.52 | WT  | NA  |
| FOLFOX-4+Bevacizumab | 2.46 | 2.13 | 2.65 | 1.88 | 2.03 | 1.66 | -3.50 | 0 | 59.79 | MUT | NA  |
| FOLFOX-4+Bevacizumab | 3.12 | 2.71 | 3.27 | 2.63 | 1.91 | 1.98 | 0.24  | 0 | 63.44 | WT  | WT  |
| FOLFOX-4+Bevacizumab | 3.23 | 2.95 | 3.25 | 2.98 | 2.45 | 1.80 | 1.91  | 0 | 59.7  | WT  | MUT |
| FOLFOX-4+Bevacizumab | 2.99 | 2.62 | 3.32 | 2.80 | 1.92 | 2.04 | 0.28  | 0 | 72.54 | WT  | WT  |
| FOLFOX-4+Bevacizumab | 3.20 | 2.89 | 3.37 | 2.76 | 1.92 | 2.11 | 1.10  | 0 | 77.54 | WT  | NA  |
| FOLFOX-4+Bevacizumab | 3.25 | 3.13 | 3.42 | 2.91 | 2.21 | 2.37 | 2.62  | 0 | 60.94 | WT  | MUT |

|                      |      |      |      |      |      |      |       |   |       |     |     |
|----------------------|------|------|------|------|------|------|-------|---|-------|-----|-----|
| FOLFOX-4+Bevacizumab | 3.23 | 2.87 | 3.26 | 2.79 | 1.98 | 2.09 | 1.05  | 0 | 80.95 | WT  | WT  |
| FOLFOX-4+Bevacizumab | 3.08 | 3.13 | 3.36 | 2.67 | 1.78 | 1.90 | 0.63  | 1 | 23.1  | WT  | MUT |
| FOLFOX-4+Bevacizumab | 3.05 | 2.68 | 3.39 | 1.96 | 2.06 | 2.53 | 0.43  | 0 | 65.94 | WT  | NA  |
| FOLFOX-4+Bevacizumab | 2.91 | 2.90 | 3.25 | 2.95 | 2.11 | 2.06 | 1.06  | 0 | 60.85 | WT  | WT  |
| FOLFOX-4+Bevacizumab | 2.48 | 2.51 | 2.98 | 2.78 | 1.73 | 1.79 | -1.77 | 0 | 66.07 | WT  | WT  |
| FOLFOX-4+Bevacizumab | 3.19 | 2.97 | 3.24 | 2.40 | 2.14 | 2.38 | 1.31  | 0 | 66.53 | WT  | MUT |
| FOLFOX-4+Bevacizumab | 3.00 | 2.61 | 2.99 | 2.35 | 2.06 | 2.48 | 0.07  | 1 | 51.02 | WT  | MUT |
| FOLFOX-4+Bevacizumab | 2.68 | 2.63 | 2.83 | 2.85 | 2.01 | 1.85 | -0.87 | 0 | 82.63 | WT  | NA  |
| FOLFOX-4+Bevacizumab | 2.72 | 2.94 | 2.76 | 2.40 | 1.69 | 2.09 | -1.29 | 0 | 87.92 | WT  | NA  |
| FOLFOX-4+Bevacizumab | 3.33 | 2.92 | 3.55 | 3.07 | 2.11 | 2.26 | 2.47  | 0 | 79.18 | WT  | WT  |
| FOLFOX-4+Bevacizumab | 2.92 | 2.62 | 3.24 | 2.58 | 2.03 | 1.95 | -0.10 | 0 | 83.91 | WT  | WT  |
| FOLFOX-4+Bevacizumab | 2.82 | 2.57 | 2.88 | 2.26 | 2.18 | 2.37 | -0.42 | 0 | 59.2  | WT  | MUT |
| FOLFOX-4+Bevacizumab | 3.14 | 2.75 | 3.01 | 2.56 | 2.09 | 2.24 | 0.51  | 0 | 68.3  | WT  | WT  |
| FOLFOX-4+Bevacizumab | 3.06 | 2.65 | 3.31 | 2.39 | 2.05 | 2.79 | 1.07  | 0 | 78.85 | WT  | MUT |
| FOLFOX-4+Bevacizumab | 3.19 | 2.79 | 3.39 | 2.78 | 1.97 | 2.05 | 0.99  | 0 | 77.9  | WT  | NA  |
| FOLFOX-4+Bevacizumab | 3.51 | 3.07 | 3.20 | 2.93 | 2.38 | 2.38 | 2.93  | 1 | 41.53 | WT  | MUT |
| FOLFOX-4+Bevacizumab | 3.06 | 2.82 | 3.31 | 2.68 | 2.08 | 2.15 | 0.95  | 0 | 64.62 | WT  | WT  |
| FOLFOX-4+Bevacizumab | 2.94 | 2.33 | 3.33 | 1.83 | 2.22 | 2.56 | -0.14 | 1 | 10.45 | WT  | NA  |
| FOLFOX-4+Bevacizumab | 3.21 | 2.93 | 3.12 | 2.43 | 2.18 | 2.57 | 1.44  | 1 | 19.25 | MUT | WT  |
| FOLFOX-4+Bevacizumab | 2.88 | 2.77 | 3.09 | 2.17 | 2.20 | 2.60 | 0.48  | 0 | 78.13 | WT  | MUT |
| FOLFOX-4+Bevacizumab | 3.21 | 2.72 | 3.35 | 2.36 | 2.22 | 2.74 | 1.67  | 0 | 83.15 | MUT | NA  |
| FOLFOX-4+Bevacizumab | 2.91 | 2.44 | 3.17 | 2.78 | 2.16 | 2.00 | 0.08  | 0 | 72.11 | WT  | WT  |
| FOLFOX-4+Bevacizumab | 3.17 | 2.73 | 3.04 | 2.36 | 1.98 | 2.03 | -0.16 | 0 | 78.19 | WT  | WT  |
| FOLFOX-4+Bevacizumab | 3.21 | 2.50 | 2.99 | 2.32 | 2.08 | 2.16 | -0.23 | 0 | 72.34 | WT  | WT  |
| FOLFOX-4+Bevacizumab | 3.00 | 3.15 | 3.40 | 2.64 | 2.06 | 2.92 | 2.35  | 0 | 2.79  | WT  | MUT |
| FOLFOX-4+Bevacizumab | 3.33 | 2.75 | 3.16 | 2.67 | 2.18 | 2.29 | 1.33  | 0 | 58.58 | WT  | WT  |
| FOLFOX-4+Bevacizumab | 3.12 | 2.89 | 3.24 | 2.49 | 2.24 | 2.51 | 1.57  | 0 | 60.39 | MUT | NA  |
| FOLFOX-4+Bevacizumab | 2.72 | 2.47 | 3.07 | 2.24 | 2.16 | 2.31 | -0.57 | 0 | 42.71 | WT  | WT  |
| FOLFOX-4+Bevacizumab | 2.72 | 2.79 | 3.18 | 2.72 | 1.85 | 1.68 | -0.72 | 1 | 68.73 | WT  | NA  |
| FOLFOX-4+Bevacizumab | 2.84 | 2.69 | 3.19 | 2.66 | 1.81 | 1.84 | -0.64 | 0 | 60.06 | WT  | NA  |
| FOLFOX-4+Bevacizumab | 2.95 | 2.64 | 3.17 | 2.66 | 2.02 | 1.89 | -0.12 | 0 | 60.06 | WT  | NA  |
| FOLFOX-4+Bevacizumab | 3.05 | 2.65 | 3.12 | 2.47 | 2.06 | 2.63 | 0.69  | 0 | 61.01 | WT  | MUT |
| FOLFOX-4+Bevacizumab | 3.24 | 2.74 | 3.24 | 2.45 | 2.06 | 2.35 | 0.90  | 0 | 60.62 | WT  | NA  |
| FOLFOX-4+Bevacizumab | 3.23 | 3.23 | 3.06 | 3.09 | 2.09 | 1.89 | 1.62  | 0 | 60.98 | WT  | MUT |
| FOLFOX-4+Bevacizumab | 3.26 | 2.63 | 3.16 | 2.43 | 2.23 | 2.01 | 0.54  | 1 | 33.97 | WT  | MUT |
| FOLFOX-4+Bevacizumab | 2.94 | 2.76 | 3.41 | 2.46 | 1.84 | 2.14 | 0.12  | 0 | 60.94 | WT  | MUT |
| FOLFOX-4+Bevacizumab | 3.22 | 2.82 | 3.31 | 2.62 | 2.01 | 2.42 | 1.29  | 0 | 74.02 | WT  | MUT |
| FOLFOX-4+Bevacizumab | 3.29 | 2.66 | 3.37 | 2.72 | 2.26 | 2.13 | 1.49  | 0 | 63.7  | WT  | MUT |
| FOLFOX-4+Bevacizumab | 3.22 | 2.42 | 3.22 | 2.50 | 1.91 | 1.75 | -0.60 | 0 | 77.31 | WT  | NA  |
| FOLFOX-4+Bevacizumab | 3.03 | 2.85 | 3.15 | 2.58 | 1.81 | 2.06 | -0.01 | 1 | 34.23 | WT  | MUT |
| FOLFOX-4+Bevacizumab | 3.22 | 3.00 | 3.29 | 2.80 | 2.16 | 1.74 | 1.22  | 0 | 74.78 | WT  | MUT |
| FOLFOX-4+Bevacizumab | 3.06 | 2.74 | 3.20 | 2.87 | 1.94 | 1.96 | 0.39  | 0 | 61.96 | WT  | WT  |
| FOLFOX-4+Bevacizumab | 3.18 | 2.92 | 3.64 | 2.82 | 2.00 | 2.11 | 1.70  | 0 | 60.52 | WT  | WT  |
| FOLFOX-4+Bevacizumab | 3.00 | 2.90 | 3.38 | 3.08 | 2.14 | 1.83 | 1.29  | 0 | 59.6  | WT  | NA  |
| FOLFOX-4+Bevacizumab | 2.93 | 2.76 | 3.42 | 2.52 | 1.94 | 2.14 | 0.40  | 0 | 77.67 | WT  | WT  |
| FOLFOX-4+Bevacizumab | 2.99 | 2.87 | 3.09 | 2.85 | 2.08 | 1.89 | 0.50  | 0 | 84.67 | WT  | NA  |



|                      |      |      |      |      |      |      |       |   |       |     |     |
|----------------------|------|------|------|------|------|------|-------|---|-------|-----|-----|
| FOLFOX-4+Bevacizumab | 3.05 | 2.75 | 3.26 | 1.96 | 2.02 | 1.86 | -0.54 | 0 | 78.88 | WT  | WT  |
| FOLFOX-4+Bevacizumab | 3.36 | 2.90 | 3.35 | 2.39 | 1.91 | 2.33 | 1.08  | 0 | 79.93 | WT  | MUT |
| FOLFOX-4+Bevacizumab | 3.48 | 2.58 | 3.51 | 2.14 | 2.26 | 1.88 | 0.83  | 0 | 72.9  | WT  | MUT |
| FOLFOX-4+Bevacizumab | 3.23 | 3.10 | 3.31 | 2.87 | 2.36 | 1.95 | 2.12  | 0 | 59.63 | NA  | WT  |
| XELOX+Bevacizumab    | 2.91 | 3.04 | 3.32 | 2.27 | 1.81 | 2.52 | 0.55  | 0 | 79.77 | MUT | WT  |
| XELOX+Bevacizumab    | 2.91 | 3.04 | 3.32 | 2.27 | 1.81 | 2.52 | 0.55  | 0 | 80.89 | WT  | NA  |
| XELOX+Bevacizumab    | 3.21 | 2.90 | 3.17 | 2.67 | 1.76 | 1.92 | 0.16  | 1 | 43.43 | WT  | NA  |
| XELOX+Bevacizumab    | 3.36 | 2.93 | 3.65 | 2.41 | 2.49 | 2.51 | 2.93  | 1 | 32.26 | WT  | MUT |
| XELOX+Bevacizumab    | 2.74 | 2.63 | 3.24 | 2.75 | 2.16 | 2.29 | 0.53  | 0 | 62.39 | WT  | WT  |
| XELOX+Bevacizumab    | 3.04 | 2.80 | 2.92 | 2.82 | 2.17 | 2.30 | 0.85  | 0 | 66.2  | WT  | MUT |
| XELOX+Bevacizumab    | 2.92 | 2.49 | 3.08 | 2.31 | 1.96 | 2.09 | -0.80 | 1 | 63.41 | WT  | MUT |
| XELOX+Bevacizumab    | 2.92 | 2.67 | 3.05 | 2.04 | 1.99 | 2.46 | -0.40 | 0 | 85.62 | WT  | NA  |
| XELOX+Bevacizumab    | 3.04 | 2.59 | 3.22 | 2.80 | 1.62 | 1.86 | -0.63 | 1 | 24.57 | WT  | NA  |
| XELOX+Bevacizumab    | 2.82 | 2.44 | 2.91 | 1.84 | 1.76 | 1.79 | -2.58 | 0 | 74.81 | WT  | NA  |
| XELOX+Bevacizumab    | 3.12 | 2.83 | 3.35 | 3.00 | 2.29 | 2.20 | 1.95  | 0 | 77.54 | WT  | MUT |
| XELOX+Bevacizumab    | 2.94 | 2.73 | 3.45 | 2.69 | 1.83 | 1.88 | 0.06  | 0 | 77.67 | WT  | WT  |
| XELOX+Bevacizumab    | 3.13 | 2.87 | 3.26 | 2.56 | 2.00 | 2.67 | 1.37  | 0 | 66.86 | WT  | MUT |
| XELOX+Bevacizumab    | 2.81 | 2.60 | 3.32 | 2.67 | 2.01 | 2.03 | 0.00  | 0 | 67.09 | WT  | WT  |
| XELOX+Bevacizumab    | 2.89 | 2.40 | 2.86 | 2.63 | 2.03 | 1.84 | -1.11 | 0 | 62.88 | MUT | NA  |
| XELOX+Bevacizumab    | 3.22 | 2.84 | 3.22 | 2.81 | 2.10 | 1.64 | 0.63  | 1 | 74.35 | WT  | WT  |
| XELOX+Bevacizumab    | 3.38 | 2.66 | 3.14 | 2.36 | 2.18 | 2.29 | 0.87  | 0 | 73.26 | WT  | WT  |
| XELOX+Bevacizumab    | 3.37 | 3.26 | 2.96 | 2.72 | 2.21 | 2.16 | 1.83  | 1 | 79.18 | WT  | NA  |
| XELOX+Bevacizumab    | 3.06 | 2.72 | 3.30 | 2.58 | 2.15 | 1.81 | 0.39  | 0 | 86.51 | WT  | MUT |
| XELOX+Bevacizumab    | 2.98 | 2.45 | 3.24 | 2.11 | 2.09 | 1.95 | -0.70 | 0 | 80.76 | WT  | NA  |
| XELOX+Bevacizumab    | 2.99 | 2.61 | 3.27 | 2.48 | 1.95 | 2.27 | 0.15  | 0 | 72.84 | WT  | NA  |
| XELOX+Bevacizumab    | 3.24 | 2.87 | 3.11 | 2.83 | 2.21 | 1.86 | 1.05  | 0 | 64.69 | WT  | MUT |
| XELOX+Bevacizumab    | 3.01 | 2.57 | 3.27 | 2.03 | 2.01 | 2.19 | -0.41 | 0 | 59.79 | WT  | WT  |
| XELOX+Bevacizumab    | 3.05 | 3.03 | 3.03 | 2.68 | 2.05 | 2.76 | 1.52  | 0 | 64.69 | WT  | MUT |
| XELOX+Bevacizumab    | 3.32 | 2.80 | 3.08 | 2.53 | 1.83 | 2.46 | 0.66  | 0 | 82.99 | WT  | NA  |
| XELOX+Bevacizumab    | 3.26 | 2.68 | 3.25 | 2.45 | 2.03 | 2.03 | 0.41  | 0 | 79.24 | WT  | NA  |
| XELOX+Bevacizumab    | 3.21 | 2.99 | 3.00 | 2.74 | 1.95 | 2.52 | 1.22  | 0 | 77.77 | WT  | MUT |
| XELOX+Bevacizumab    | 3.41 | 2.68 | 3.52 | 2.60 | 2.37 | 2.28 | 2.15  | 0 | 60.06 | MUT | WT  |
| XELOX+Bevacizumab    | 2.86 | 2.58 | 3.03 | 2.23 | 2.12 | 1.98 | -0.76 | 0 | 79.34 | WT  | WT  |
| XELOX+Bevacizumab    | 2.91 | 3.04 | 3.32 | 2.27 | 1.81 | 2.52 | 0.55  | 0 | 80.59 | WT  | MUT |
| XELOX+Bevacizumab    | 3.06 | 2.68 | 3.54 | 2.63 | 2.06 | 2.78 | 1.73  | 0 | 60.22 | WT  | MUT |
| XELOX+Bevacizumab    | 3.34 | 2.75 | 3.33 | 2.57 | 2.08 | 2.34 | 1.37  | 0 | 79.21 | WT  | MUT |
| XELOX+Bevacizumab    | 2.93 | 2.70 | 3.26 | 2.30 | 2.14 | 2.19 | 0.23  | 0 | 78    | WT  | WT  |
| XELOX+Bevacizumab    | 3.07 | 2.63 | 3.13 | 2.41 | 2.01 | 2.37 | 0.23  | 0 | 63.21 | WT  | NA  |
| XELOX+Bevacizumab    | 3.07 | 2.90 | 3.28 | 2.62 | 2.37 | 2.15 | 1.53  | 0 | 78.75 | WT  | MUT |
| XELOX+Bevacizumab    | 2.99 | 2.75 | 3.35 | 2.93 | 1.90 | 1.79 | 0.34  | 0 | 71.98 | WT  | NA  |
| XELOX+Bevacizumab    | 2.79 | 2.76 | 3.28 | 2.57 | 2.04 | 2.23 | 0.35  | 0 | 79.31 | WT  | MUT |
| XELOX+Bevacizumab    | 2.91 | 3.04 | 3.32 | 2.27 | 1.81 | 2.52 | 0.55  | 0 | 77.5  | WT  | NA  |
| XELOX+Bevacizumab    | 3.00 | 2.66 | 3.10 | 2.30 | 1.75 | 2.67 | -0.14 | 1 | 18.76 | WT  | MUT |
| XELOX+Bevacizumab    | 3.50 | 2.49 | 3.47 | 2.86 | 2.74 | 2.24 | 2.87  | 0 | 60.98 | WT  | WT  |
| XELOX+Bevacizumab    | 3.16 | 2.70 | 3.00 | 2.71 | 2.29 | 2.09 | 0.80  | 0 | 67.75 | NA  | WT  |
| XELOX+Bevacizumab    | 3.17 | 2.84 | 3.32 | 2.45 | 1.76 | 2.26 | 0.41  | 0 | 65.68 | WT  | WT  |

|                   |      |      |      |      |      |      |       |   |       |     |     |
|-------------------|------|------|------|------|------|------|-------|---|-------|-----|-----|
| XELOX+Bevacizumab | 2.82 | 2.53 | 3.03 | 2.25 | 1.86 | 2.54 | -0.68 | 0 | 78.85 | WT  | MUT |
| XELOX+Bevacizumab | 2.93 | 2.77 | 3.19 | 2.80 | 1.98 | 1.93 | 0.20  | 0 | 81.87 | WT  | WT  |
| XELOX+Bevacizumab | 2.98 | 2.82 | 3.11 | 2.40 | 1.97 | 2.14 | -0.01 | 1 | 44.45 | WT  | WT  |
| XELOX+Bevacizumab | 3.26 | 3.00 | 3.57 | 2.70 | 2.58 | 3.26 | 4.21  | 0 | 75.24 | MUT | WT  |
| XELOX+Bevacizumab | 2.87 | 2.59 | 3.27 | 2.67 | 1.70 | 2.09 | -0.52 | 0 | 73.49 | WT  | NA  |
| XELOX+Bevacizumab | 3.55 | 3.25 | 3.22 | 2.92 | 2.40 | 2.69 | 3.69  | 0 | 60.22 | MUT | NA  |
| XELOX+Bevacizumab | 2.73 | 2.62 | 2.81 | 2.56 | 1.65 | 1.94 | -1.75 | 0 | 78.06 | WT  | NA  |
| XELOX+Bevacizumab | 2.89 | 2.75 | 3.15 | 2.43 | 1.79 | 2.16 | -0.46 | 0 | 67.94 | WT  | MUT |
| XELOX+Bevacizumab | 3.40 | 3.27 | 3.10 | 2.98 | 1.99 | 1.79 | 1.53  | 1 | 52.99 | WT  | MUT |
| XELOX+Bevacizumab | 3.05 | 2.82 | 3.30 | 2.88 | 1.89 | 1.70 | 0.26  | 0 | 80.99 | WT  | NA  |
| XELOX+Bevacizumab | 3.69 | 2.94 | 3.13 | 2.81 | 2.15 | 2.69 | 2.67  | 0 | 81.45 | WT  | MUT |
| XELOX+Bevacizumab | 3.09 | 3.06 | 3.40 | 2.90 | 1.97 | 2.01 | 1.37  | 0 | 48.59 | WT  | MUT |
| XELOX+Bevacizumab | 3.06 | 3.04 | 3.28 | 3.02 | 2.02 | 2.03 | 1.37  | 0 | 60.02 | WT  | NA  |
| XELOX+Bevacizumab | 2.46 | 2.32 | 3.10 | 2.26 | 1.59 | 1.63 | -2.97 | 0 | 81.48 | WT  | WT  |
| XELOX+Bevacizumab | 3.01 | 2.63 | 3.30 | 2.35 | 2.39 | 1.74 | 0.28  | 0 | 64    | MUT | NA  |
| XELOX+Bevacizumab | 2.75 | 2.51 | 2.96 | 2.63 | 1.86 | 1.56 | -1.66 | 0 | 81.48 | WT  | NA  |
| XELOX+Bevacizumab | 3.22 | 2.95 | 3.04 | 3.00 | 2.14 | 2.56 | 1.96  | 0 | 72.44 | WT  | MUT |
| XELOX+Bevacizumab | 2.93 | 2.72 | 3.52 | 2.80 | 1.97 | 1.95 | 0.63  | 0 | 61.73 | WT  | NA  |
| XELOX+Bevacizumab | 3.59 | 2.86 | 3.31 | 2.65 | 2.04 | 1.88 | 1.28  | 0 | 83.38 | WT  | MUT |
| XELOX+Bevacizumab | 2.88 | 3.05 | 2.92 | 2.63 | 2.11 | 2.65 | 1.07  | 1 | 72.67 | WT  | NA  |
| XELOX+Bevacizumab | 2.96 | 2.77 | 3.07 | 2.59 | 2.09 | 1.90 | 0.01  | 0 | 60.29 | WT  | WT  |
| XELOX+Bevacizumab | 3.32 | 2.78 | 3.31 | 2.56 | 2.23 | 2.46 | 1.75  | 0 | 61.17 | MUT | NA  |
| XELOX+Bevacizumab | 3.32 | 2.95 | 2.91 | 2.58 | 2.24 | 2.39 | 1.38  | 0 | 75.01 | NA  | NA  |
| XELOX+Bevacizumab | 2.81 | 2.42 | 3.41 | 2.54 | 2.30 | 2.19 | 0.46  | 0 | 77.21 | WT  | WT  |
| XELOX+Bevacizumab | 3.22 | 2.84 | 3.40 | 3.05 | 2.08 | 1.78 | 1.31  | 0 | 82.63 | WT  | WT  |
| XELOX+Bevacizumab | 2.82 | 3.00 | 2.94 | 2.76 | 1.91 | 2.54 | 0.59  | 0 | 85.59 | WT  | MUT |
| XELOX+Bevacizumab | 3.14 | 2.79 | 3.27 | 2.86 | 2.00 | 1.80 | 0.61  | 0 | 59.37 | WT  | WT  |
| XELOX+Bevacizumab | 2.88 | 2.92 | 3.19 | 2.62 | 2.08 | 2.21 | 0.67  | 0 | 68.5  | WT  | MUT |
| XELOX+Bevacizumab | 3.10 | 2.61 | 3.17 | 2.69 | 1.82 | 1.69 | -0.56 | 0 | 83.19 | WT  | NA  |
| XELOX+Bevacizumab | 3.13 | 2.86 | 3.31 | 2.94 | 1.89 | 2.33 | 1.27  | 0 | 84.93 | WT  | MUT |
| XELOX+Bevacizumab | 2.73 | 2.67 | 2.95 | 2.70 | 2.03 | 1.85 | -0.70 | 0 | 76.48 | WT  | NA  |
| XELOX+Bevacizumab | 3.32 | 2.71 | 3.34 | 2.68 | 2.50 | 2.92 | 2.91  | 0 | 60.09 | MUT | WT  |
| XELOX+Bevacizumab | 3.37 | 2.80 | 3.33 | 2.62 | 2.17 | 2.65 | 2.07  | 0 | 82.83 | WT  | MUT |
| XELOX+Bevacizumab | 3.11 | 2.79 | 3.27 | 2.59 | 2.14 | 2.06 | 0.82  | 0 | 73.2  | WT  | WT  |
| XELOX+Bevacizumab | 2.72 | 2.58 | 3.23 | 1.63 | 1.73 | 2.95 | -0.91 | 0 | 75.07 | WT  | NA  |
| XELOX+Bevacizumab | 2.97 | 2.64 | 2.99 | 2.68 | 2.26 | 2.21 | 0.52  | 0 | 76.42 | MUT | NA  |
| XELOX+Bevacizumab | 3.10 | 2.72 | 3.14 | 2.57 | 2.03 | 2.29 | 0.55  | 0 | 76.42 | WT  | NA  |
| XELOX+Bevacizumab | 3.07 | 2.82 | 3.25 | 2.73 | 1.72 | 1.79 | -0.17 | 0 | 65.74 | WT  | NA  |
| XELOX+Bevacizumab | 2.95 | 2.67 | 2.77 | 1.91 | 1.94 | 2.56 | -0.90 | 0 | 71.89 | WT  | NA  |
| XELOX+Bevacizumab | 2.93 | 2.63 | 2.97 | 2.31 | 1.57 | 2.34 | -1.19 | 0 | 77.27 | WT  | MUT |
| XELOX+Bevacizumab | 2.72 | 2.73 | 3.10 | 2.32 | 1.81 | 1.93 | -1.16 | 1 | 50.04 | WT  | NA  |
| XELOX+Bevacizumab | 3.05 | 2.71 | 3.40 | 2.53 | 2.26 | 2.64 | 1.66  | 0 | 61.93 | MUT | NA  |
| XELOX+Bevacizumab | 3.03 | 2.72 | 3.21 | 2.48 | 2.06 | 2.43 | 0.69  | 0 | 75.1  | WT  | MUT |
| XELOX+Bevacizumab | 3.21 | 2.70 | 2.94 | 2.58 | 2.13 | 1.95 | 0.16  | 0 | 79.41 | WT  | MUT |
| XELOX+Bevacizumab | 3.55 | 3.00 | 3.29 | 2.47 | 2.47 | 1.52 | 1.58  | 0 | 78.26 | MUT | WT  |
| XELOX+Bevacizumab | 3.18 | 2.63 | 3.01 | 2.24 | 2.12 | 2.31 | 0.14  | 0 | 80.33 | WT  | NA  |

|                   |      |      |      |      |      |      |       |   |       |     |     |
|-------------------|------|------|------|------|------|------|-------|---|-------|-----|-----|
| XELOX+Bevacizumab | 3.11 | 2.90 | 3.06 | 2.89 | 2.24 | 1.83 | 0.92  | 0 | 66.14 | WT  | NA  |
| XELOX+Bevacizumab | 3.02 | 2.81 | 3.45 | 2.62 | 1.82 | 1.90 | 0.23  | 0 | 77.96 | WT  | MUT |
| XELOX+Bevacizumab | 2.79 | 2.45 | 3.18 | 2.41 | 1.94 | 2.11 | -0.79 | 0 | 79.74 | WT  | MUT |
| XELOX+Bevacizumab | 2.75 | 2.56 | 3.08 | 2.49 | 2.00 | 1.92 | -0.86 | 0 | 69.91 | WT  | NA  |
| XELOX+Bevacizumab | 2.66 | 3.11 | 3.47 | 2.71 | 1.63 | 1.56 | -0.45 | 0 | 83.81 | WT  | NA  |
| XELOX+Bevacizumab | 2.71 | 2.54 | 3.30 | 2.44 | 1.91 | 1.63 | -1.17 | 0 | 77.93 | WT  | NA  |
| XELOX+Bevacizumab | 3.24 | 2.87 | 3.28 | 2.82 | 1.95 | 1.95 | 0.90  | 0 | 69.03 | WT  | MUT |
| XELOX+Bevacizumab | 3.10 | 2.88 | 3.50 | 2.53 | 2.23 | 2.47 | 1.89  | 0 | 78.16 | WT  | NA  |
| XELOX+Bevacizumab | 3.35 | 2.47 | 2.99 | 2.78 | 2.19 | 2.11 | 0.61  | 1 | 29.11 | WT  | MUT |
| XELOX+Bevacizumab | 2.67 | 2.42 | 3.07 | 2.09 | 1.91 | 2.42 | -1.22 | 0 | 61.9  | WT  | NA  |
| XELOX+Bevacizumab | 3.08 | 2.93 | 3.06 | 2.50 | 1.81 | 2.14 | 0.05  | 0 | 78.85 | WT  | MUT |
| XELOX+Bevacizumab | 3.05 | 2.70 | 2.86 | 2.42 | 2.01 | 1.83 | -0.72 | 0 | 65.12 | WT  | MUT |
| XELOX+Bevacizumab | 3.05 | 3.14 | 3.28 | 2.75 | 2.12 | 2.46 | 1.91  | 0 | 61.21 | MUT | NA  |
| XELOX+Bevacizumab | 3.35 | 3.07 | 3.10 | 2.80 | 2.10 | 2.19 | 1.63  | 0 | 66.17 | WT  | WT  |
| XELOX+Bevacizumab | 3.28 | 3.21 | 3.51 | 3.11 | 2.00 | 2.30 | 2.68  | 0 | 72.02 | WT  | NA  |
| XELOX+Bevacizumab | 3.09 | 2.55 | 3.29 | 2.26 | 2.21 | 1.96 | 0.07  | 0 | 53.72 | WT  | MUT |
| XELOX+Bevacizumab | 3.06 | 2.60 | 3.44 | 2.97 | 2.01 | 1.80 | 0.60  | 0 | 76.22 | WT  | WT  |
| XELOX+Bevacizumab | 2.91 | 3.06 | 3.08 | 2.81 | 1.76 | 2.73 | 1.03  | 0 | 83.94 | WT  | WT  |
| XELOX+Bevacizumab | 2.90 | 2.66 | 3.37 | 2.29 | 1.68 | 2.68 | 0.01  | 0 | 69.75 | WT  | WT  |
| XELOX+Bevacizumab | 2.88 | 2.98 | 3.09 | 2.85 | 1.82 | 1.83 | -0.04 | 0 | 77.31 | WT  | WT  |
| XELOX+Bevacizumab | 3.49 | 2.82 | 3.35 | 2.93 | 2.04 | 2.01 | 1.64  | 0 | 72.67 | WT  | MUT |
| XELOX+Bevacizumab | 2.99 | 2.65 | 3.16 | 2.69 | 2.04 | 2.02 | 0.15  | 0 | 64.53 | WT  | WT  |
| XELOX+Bevacizumab | 3.06 | 2.54 | 2.97 | 2.11 | 1.76 | 1.82 | -1.66 | 0 | 61.14 | WT  | NA  |
| XELOX+Bevacizumab | 2.80 | 2.64 | 2.86 | 2.65 | 1.76 | 1.65 | -1.59 | 0 | 80.89 | WT  | NA  |
| XELOX+Bevacizumab | 3.18 | 2.49 | 3.35 | 1.88 | 2.12 | 2.37 | 0.08  | 0 | 75.4  | WT  | NA  |
| XELOX+Bevacizumab | 3.16 | 2.74 | 3.01 | 2.32 | 2.20 | 2.03 | 0.20  | 0 | 59.93 | WT  | MUT |
| XELOX+Bevacizumab | 2.57 | 2.67 | 2.87 | 2.22 | 2.27 | 2.37 | -0.50 | 0 | 77.9  | WT  | NA  |
| XELOX+Bevacizumab | 3.09 | 2.94 | 3.08 | 3.17 | 1.81 | 1.75 | 0.39  | 0 | 61.17 | WT  | MUT |
| XELOX+Bevacizumab | 2.40 | 2.44 | 2.68 | 1.80 | 1.54 | 2.38 | -3.23 | 0 | 60.25 | WT  | WT  |
| XELOX+Bevacizumab | 2.91 | 3.04 | 3.32 | 2.27 | 1.81 | 2.52 | 0.55  | 0 | 73    | WT  | MUT |
| XELOX+Bevacizumab | 2.82 | 2.31 | 2.96 | 2.27 | 1.96 | 1.93 | -1.64 | 0 | 83.55 | WT  | NA  |
| XELOX+Bevacizumab | 3.04 | 2.76 | 3.08 | 2.13 | 1.81 | 2.43 | -0.31 | 0 | 79.64 | WT  | MUT |
| XELOX+Bevacizumab | 3.19 | 3.29 | 3.50 | 2.91 | 2.26 | 2.50 | 3.18  | 0 | 76.65 | WT  | MUT |
| XELOX+Bevacizumab | 3.19 | 2.67 | 4.06 | 2.86 | 1.91 | 1.92 | 1.65  | 0 | 84.44 | WT  | WT  |
| XELOX+Bevacizumab | 2.34 | 2.34 | 2.75 | 2.01 | 1.93 | 1.81 | -3.07 | 0 | 68.14 | WT  | NA  |
| XELOX+Bevacizumab | 3.14 | 3.01 | 3.39 | 3.12 | 1.90 | 1.75 | 1.17  | 0 | 73.63 | WT  | MUT |
| XELOX+Bevacizumab | 3.10 | 2.41 | 3.07 | 2.62 | 2.12 | 2.52 | 0.48  | 0 | 64.66 | WT  | MUT |
| XELOX+Bevacizumab | 3.17 | 2.93 | 3.43 | 2.45 | 1.61 | 2.04 | 0.16  | 0 | 85.78 | WT  | MUT |
| XELOX+Bevacizumab | 3.39 | 2.75 | 3.28 | 2.56 | 1.97 | 2.53 | 1.37  | 0 | 60.55 | WT  | MUT |
| XELOX+Bevacizumab | 3.17 | 2.87 | 3.19 | 2.96 | 1.95 | 1.53 | 0.34  | 0 | 59.99 | WT  | WT  |
| XELOX+Bevacizumab | 3.00 | 2.38 | 3.25 | 2.41 | 1.94 | 2.05 | -0.59 | 0 | 80.16 | WT  | WT  |
| XELOX+Bevacizumab | 3.19 | 3.00 | 3.40 | 2.97 | 1.89 | 1.91 | 1.21  | 0 | 73.03 | WT  | MUT |
| XELOX+Bevacizumab | 2.86 | 2.89 | 3.65 | 2.95 | 2.16 | 1.81 | 1.37  | 0 | 77.6  | WT  | MUT |
| XELOX+Bevacizumab | 2.78 | 2.51 | 2.93 | 2.27 | 1.85 | 1.54 | -2.12 | 0 | 73.4  | WT  | MUT |
| XELOX+Bevacizumab | 3.12 | 2.73 | 3.17 | 2.60 | 2.00 | 2.31 | 0.66  | 0 | 78.29 | WT  | MUT |
| XELOX+Bevacizumab | 2.84 | 2.68 | 3.01 | 2.48 | 2.04 | 2.45 | 0.05  | 0 | 82.56 | WT  | WT  |

|                   |      |      |      |      |      |      |       |   |       |     |     |
|-------------------|------|------|------|------|------|------|-------|---|-------|-----|-----|
| XELOX+Bevacizumab | 3.16 | 2.70 | 3.29 | 2.39 | 1.92 | 2.24 | 0.34  | 0 | 60.25 | WT  | WT  |
| XELOX+Bevacizumab | 2.36 | 2.38 | 2.80 | 2.23 | 1.77 | 1.51 | -3.31 | 0 | 83.42 | WT  | NA  |
| XELOX+Bevacizumab | 2.91 | 3.04 | 3.32 | 2.27 | 1.81 | 2.52 | 0.55  | 0 | 77.7  | WT  | NA  |
| XELOX+Bevacizumab | 2.84 | 3.01 | 3.56 | 2.50 | 2.18 | 2.41 | 1.62  | 0 | 79.08 | MUT | NA  |
| XELOX+Bevacizumab | 2.88 | 2.54 | 2.87 | 2.08 | 2.08 | 2.49 | -0.66 | 0 | 83.42 | MUT | NA  |
| XELOX+Bevacizumab | 2.85 | 2.68 | 3.11 | 2.63 | 1.81 | 1.81 | -0.81 | 0 | 83.19 | NA  | NA  |
| XELOX+Bevacizumab | 2.93 | 2.60 | 3.02 | 2.49 | 1.88 | 1.85 | -0.97 | 0 | 84.4  | WT  | WT  |
| XELOX+Bevacizumab | 3.17 | 3.03 | 3.20 | 2.91 | 1.91 | 1.98 | 0.99  | 1 | 2.2   | WT  | MUT |
| XELOX+Bevacizumab | 3.23 | 2.80 | 3.12 | 2.45 | 2.15 | 2.18 | 0.77  | 0 | 60.32 | WT  | MUT |
| XELOX+Bevacizumab | 2.59 | 2.30 | 2.85 | 2.48 | 1.49 | 1.40 | -3.40 | 0 | 59.86 | WT  | NA  |
| XELOX+Bevacizumab | 3.41 | 2.63 | 3.19 | 2.24 | 2.20 | 2.61 | 1.21  | 0 | 57.03 | WT  | NA  |
| XELOX+Bevacizumab | 2.92 | 2.20 | 2.66 | 2.30 | 1.83 | 2.05 | -2.20 | 0 | 61.31 | WT  | MUT |
| XELOX+Bevacizumab | 3.08 | 2.73 | 3.23 | 2.66 | 2.03 | 2.16 | 0.62  | 0 | 60.48 | WT  | MUT |
| XELOX+Bevacizumab | 2.67 | 2.89 | 3.10 | 2.34 | 1.94 | 2.80 | 0.35  | 0 | 80.23 | WT  | MUT |
| XELOX+Bevacizumab | 2.99 | 2.32 | 3.65 | 2.58 | 1.97 | 2.13 | 0.25  | 0 | 76.75 | WT  | NA  |
| XELOX+Bevacizumab | 3.22 | 2.95 | 3.31 | 2.88 | 2.24 | 2.97 | 2.89  | 0 | 61.4  | WT  | WT  |
| XELOX+Bevacizumab | 3.10 | 2.88 | 3.22 | 2.73 | 2.25 | 2.71 | 2.01  | 1 | 36.7  | WT  | NA  |
| XELOX+Bevacizumab | 2.84 | 2.42 | 2.87 | 1.88 | 1.85 | 1.90 | -2.31 | 0 | 84.17 | WT  | WT  |
| XELOX+Bevacizumab | 3.09 | 2.95 | 3.53 | 2.95 | 1.98 | 1.80 | 1.22  | 1 | 20.6  | WT  | WT  |
| XELOX+Bevacizumab | 2.94 | 2.61 | 3.36 | 2.72 | 1.92 | 1.83 | -0.09 | 0 | 61.83 | WT  | NA  |
| XELOX+Bevacizumab | 3.57 | 2.65 | 3.36 | 2.53 | 2.23 | 2.56 | 2.06  | 1 | 22.31 | MUT | WT  |
| XELOX+Bevacizumab | 2.85 | 2.54 | 3.39 | 3.01 | 1.98 | 1.91 | 0.29  | 0 | 84.86 | WT  | NA  |
| XELOX+Bevacizumab | 3.49 | 3.00 | 3.41 | 3.03 | 2.12 | 2.04 | 2.31  | 0 | 82.04 | WT  | MUT |
| XELOX+Bevacizumab | 2.62 | 2.47 | 2.87 | 2.38 | 1.67 | 1.98 | -2.17 | 0 | 84.8  | WT  | NA  |
| XELOX+Bevacizumab | 3.14 | 2.72 | 3.13 | 2.76 | 2.20 | 2.00 | 0.78  | 0 | 86.31 | MUT | WT  |
| XELOX+Bevacizumab | 2.97 | 2.91 | 3.04 | 2.92 | 1.71 | 1.90 | -0.17 | 0 | 79.9  | WT  | NA  |
| XELOX+Bevacizumab | 3.29 | 2.76 | 3.16 | 2.49 | 2.30 | 2.44 | 1.49  | 0 | 81.97 | WT  | MUT |
| XELOX+Bevacizumab | 2.90 | 2.62 | 3.20 | 2.37 | 1.95 | 1.90 | -0.65 | 0 | 76.62 | WT  | NA  |
| XELOX+Bevacizumab | 2.70 | 2.58 | 3.14 | 2.63 | 1.71 | 2.18 | -0.89 | 0 | 79.08 | WT  | NA  |
| XELOX+Bevacizumab | 3.01 | 2.58 | 3.34 | 2.14 | 2.14 | 2.26 | 0.18  | 1 | 43.01 | WT  | MUT |
| XELOX+Bevacizumab | 2.64 | 2.62 | 2.77 | 2.32 | 1.88 | 1.95 | -1.76 | 0 | 59.7  | WT  | NA  |
| XELOX+Bevacizumab | 3.02 | 2.65 | 3.17 | 2.56 | 2.29 | 1.78 | 0.25  | 0 | 61.44 | WT  | NA  |
| XELOX+Bevacizumab | 2.89 | 2.70 | 3.27 | 2.55 | 1.83 | 2.26 | -0.02 | 0 | 80.03 | WT  | WT  |
| XELOX+Bevacizumab | 3.02 | 2.91 | 3.22 | 2.74 | 2.12 | 2.05 | 0.94  | 0 | 84.24 | WT  | MUT |
| XELOX+Bevacizumab | 3.19 | 2.68 | 3.41 | 2.59 | 2.08 | 1.96 | 0.75  | 0 | 79.24 | WT  | NA  |
| XELOX+Bevacizumab | 2.84 | 2.80 | 3.31 | 2.62 | 2.34 | 2.37 | 1.32  | 0 | 59.83 | MUT | NA  |
| XELOX+Bevacizumab | 2.93 | 2.70 | 3.17 | 2.59 | 1.79 | 1.66 | -0.86 | 0 | 79.9  | WT  | MUT |
| XELOX+Bevacizumab | 3.02 | 3.09 | 3.07 | 2.41 | 2.24 | 2.38 | 1.23  | 0 | 76.12 | WT  | MUT |
| XELOX+Bevacizumab | 2.94 | 2.56 | 3.24 | 2.30 | 1.71 | 2.11 | -0.90 | 0 | 82.99 | WT  | MUT |
| XELOX+Bevacizumab | 2.73 | 2.48 | 2.77 | 2.21 | 1.69 | 1.66 | -2.70 | 0 | 80.13 | WT  | NA  |
| XELOX+Bevacizumab | 2.81 | 2.63 | 3.11 | 2.65 | 2.14 | 1.88 | -0.22 | 0 | 81.61 | WT  | MUT |
| XELOX+Bevacizumab | 2.91 | 3.07 | 3.35 | 3.14 | 2.13 | 1.83 | 1.44  | 0 | 81.35 | WT  | MUT |
| XELOX+Bevacizumab | 3.08 | 2.72 | 3.24 | 2.53 | 1.98 | 2.16 | 0.38  | 0 | 84.6  | WT  | WT  |
| XELOX+Bevacizumab | 2.72 | 2.79 | 2.99 | 2.43 | 2.02 | 2.38 | -0.15 | 0 | 81.41 | MUT | NA  |
| XELOX+Bevacizumab | 2.77 | 2.93 | 2.99 | 2.94 | 2.02 | 1.30 | -0.58 | 0 | 69.13 | WT  | MUT |
| XELOX+Bevacizumab | 2.95 | 2.94 | 3.05 | 2.89 | 1.92 | 1.53 | -0.21 | 0 | 84.21 | WT  | MUT |

|                   |      |      |      |      |      |      |       |   |       |     |     |
|-------------------|------|------|------|------|------|------|-------|---|-------|-----|-----|
| XELOX+Bevacizumab | 2.94 | 2.34 | 2.95 | 2.25 | 1.76 | 1.59 | -2.28 | 0 | 68.01 | WT  | MUT |
| XELOX+Bevacizumab | 2.35 | 2.43 | 2.93 | 2.74 | 1.45 | 1.43 | -3.15 | 0 | 83.65 | WT  | NA  |
| XELOX+Bevacizumab | 2.85 | 2.77 | 3.11 | 2.75 | 1.86 | 1.81 | -0.47 | 0 | 75.53 | WT  | MUT |
| XELOX+Bevacizumab | 3.24 | 2.94 | 3.19 | 2.90 | 2.39 | 2.70 | 2.71  | 0 | 65.12 | MUT | WT  |
| XELOX+Bevacizumab | 2.83 | 2.54 | 3.00 | 2.26 | 1.90 | 1.85 | -1.44 | 0 | 72.25 | WT  | WT  |
| XELOX+Bevacizumab | 3.44 | 2.49 | 3.15 | 2.70 | 2.16 | 2.09 | 0.84  | 0 | 60.71 | MUT | WT  |
| XELOX+Bevacizumab | 2.88 | 2.80 | 3.25 | 2.68 | 1.96 | 1.99 | 0.17  | 0 | 86.01 | WT  | NA  |
| XELOX+Bevacizumab | 3.35 | 2.93 | 3.35 | 2.11 | 2.27 | 2.27 | 1.41  | 0 | 84.14 | WT  | WT  |
| XELOX+Bevacizumab | 3.36 | 2.79 | 3.50 | 2.87 | 1.97 | 2.90 | 2.50  | 0 | 83.78 | WT  | MUT |
| XELOX+Bevacizumab | 3.14 | 2.95 | 3.27 | 2.83 | 2.03 | 2.75 | 2.01  | 0 | 68.8  | WT  | MUT |
| XELOX+Bevacizumab | 3.03 | 2.65 | 3.58 | 2.73 | 1.96 | 1.86 | 0.53  | 0 | 68.24 | WT  | WT  |
| XELOX+Bevacizumab | 2.96 | 2.61 | 3.08 | 2.92 | 1.89 | 1.85 | -0.28 | 0 | 80.07 | WT  | NA  |
| XELOX+Bevacizumab | 3.29 | 2.89 | 3.50 | 2.73 | 2.31 | 2.25 | 2.28  | 0 | 77.34 | WT  | MUT |
| XELOX+Bevacizumab | 3.14 | 2.71 | 3.13 | 2.72 | 1.91 | 1.79 | -0.08 | 1 | 26.64 | WT  | MUT |
| XELOX+Bevacizumab | 3.31 | 2.66 | 3.43 | 2.38 | 2.23 | 2.08 | 1.07  | 0 | 75.76 | WT  | MUT |
| XELOX+Bevacizumab | 3.11 | 2.39 | 2.76 | 1.88 | 2.09 | 2.10 | -1.41 | 0 | 77.11 | WT  | MUT |
| XELOX+Bevacizumab | 3.04 | 2.77 | 3.10 | 2.60 | 2.12 | 2.07 | 0.44  | 0 | 78.42 | WT  | NA  |
| XELOX+Bevacizumab | 2.91 | 3.04 | 3.32 | 2.27 | 1.81 | 2.52 | 0.55  | 0 | 72.28 | WT  | MUT |
| XELOX+Bevacizumab | 3.23 | 3.11 | 3.01 | 2.92 | 2.38 | 1.34 | 1.07  | 0 | 78.62 | WT  | NA  |
| XELOX+Bevacizumab | 3.18 | 2.63 | 3.33 | 2.48 | 2.00 | 2.06 | 0.36  | 0 | 84.96 | WT  | WT  |
| XELOX+Bevacizumab | 2.87 | 2.60 | 3.23 | 2.46 | 2.02 | 1.87 | -0.47 | 0 | 60.65 | WT  | WT  |
| XELOX+Bevacizumab | 3.06 | 2.79 | 3.05 | 2.19 | 2.05 | 2.33 | 0.11  | 0 | 59.99 | WT  | WT  |
| XELOX+Bevacizumab | 3.03 | 2.42 | 3.37 | 2.48 | 2.13 | 2.12 | 0.22  | 0 | 76.58 | WT  | WT  |
| XELOX+Bevacizumab | 2.93 | 2.50 | 2.95 | 1.81 | 1.88 | 2.04 | -1.78 | 0 | 54.24 | NA  | NA  |
| XELOX+Bevacizumab | 3.01 | 3.12 | 3.05 | 2.69 | 2.12 | 2.49 | 1.44  | 0 | 61.08 | WT  | MUT |
| XELOX+Bevacizumab | 3.21 | 2.80 | 2.80 | 2.50 | 2.05 | 2.39 | 0.39  | 0 | 78.52 | WT  | NA  |
| XELOX+Bevacizumab | 3.21 | 2.86 | 3.31 | 2.78 | 2.59 | 2.60 | 2.85  | 0 | 84.93 | MUT | NA  |
| XELOX+Bevacizumab | 3.13 | 2.78 | 3.35 | 2.34 | 2.06 | 2.61 | 1.18  | 0 | 62.55 | WT  | WT  |
| XELOX+Bevacizumab | 3.11 | 2.32 | 3.06 | 2.16 | 2.23 | 1.72 | -0.96 | 0 | 83.15 | MUT | NA  |
| XELOX+Bevacizumab | 2.73 | 2.55 | 2.73 | 2.59 | 1.90 | 1.96 | -1.45 | 1 | 64.23 | WT  | NA  |
| XELOX+Bevacizumab | 2.89 | 2.33 | 2.82 | 2.22 | 1.84 | 1.76 | -2.20 | 0 | 60.16 | WT  | NA  |
| XELOX+Bevacizumab | 3.10 | 2.90 | 3.28 | 2.62 | 2.12 | 2.51 | 1.52  | 0 | 84.17 | MUT | MUT |
| XELOX+Bevacizumab | 3.07 | 2.47 | 3.04 | 2.20 | 1.88 | 2.02 | -1.07 | 0 | 60.19 | WT  | WT  |
| XELOX+Bevacizumab | 2.91 | 3.04 | 3.32 | 2.27 | 1.81 | 2.52 | 0.55  | 0 | 79.44 | WT  | MUT |
| XELOX+Bevacizumab | 2.96 | 2.65 | 2.96 | 2.33 | 2.04 | 2.10 | -0.52 | 0 | 78.46 | WT  | MUT |
| XELOX+Bevacizumab | 3.18 | 2.76 | 3.38 | 2.09 | 1.94 | 2.41 | 0.47  | 0 | 82.56 | WT  | MUT |
| XELOX+Bevacizumab | 3.14 | 2.64 | 3.21 | 2.20 | 2.36 | 1.77 | 0.16  | 0 | 84.01 | WT  | NA  |
| XELOX+Bevacizumab | 3.19 | 2.75 | 3.14 | 2.83 | 1.69 | 1.79 | -0.24 | 0 | 86.93 | WT  | NA  |
| XELOX+Bevacizumab | 3.30 | 2.72 | 3.15 | 2.36 | 2.01 | 2.58 | 0.89  | 0 | 62.72 | MUT | WT  |
| XELOX+Bevacizumab | 3.24 | 2.87 | 3.06 | 2.14 | 2.14 | 2.34 | 0.62  | 0 | 60.81 | WT  | WT  |
| XELOX+Bevacizumab | 3.48 | 2.60 | 3.15 | 2.98 | 2.28 | 2.05 | 1.56  | 0 | 68.67 | WT  | WT  |
| XELOX+Bevacizumab | 2.93 | 3.00 | 3.33 | 2.56 | 2.05 | 2.03 | 0.74  | 0 | 59.14 | WT  | NA  |
| XELOX+Bevacizumab | 2.96 | 3.31 | 3.11 | 2.68 | 2.31 | 2.46 | 2.07  | 0 | 78.23 | MUT | WT  |
| XELOX+Bevacizumab | 2.74 | 2.88 | 2.66 | 2.64 | 2.12 | 2.62 | 0.25  | 0 | 62.36 | WT  | NA  |
| XELOX+Bevacizumab | 2.45 | 2.61 | 2.88 | 2.47 | 1.87 | 1.68 | -2.04 | 0 | 65.87 | WT  | NA  |
| XELOX+Bevacizumab | 3.09 | 3.03 | 2.85 | 2.64 | 2.00 | 2.05 | 0.33  | 0 | 60.91 | WT  | NA  |

|                   |      |      |      |      |      |      |       |   |       |     |     |
|-------------------|------|------|------|------|------|------|-------|---|-------|-----|-----|
| XELOX+Bevacizumab | 3.29 | 2.91 | 3.39 | 2.70 | 2.06 | 2.21 | 1.60  | 0 | 58.97 | WT  | MUT |
| XELOX+Bevacizumab | 2.95 | 2.67 | 3.46 | 2.70 | 1.97 | 1.92 | 0.34  | 0 | 64.95 | WT  | NA  |
| XELOX+Bevacizumab | 3.26 | 3.04 | 3.36 | 2.60 | 2.38 | 3.14 | 3.31  | 1 | 27.5  | MUT | WT  |
| XELOX+Bevacizumab | 3.29 | 2.15 | 3.50 | 2.30 | 2.33 | 2.23 | 0.65  | 0 | 79.87 | NA  | NA  |
| XELOX+Bevacizumab | 3.14 | 2.65 | 3.24 | 2.58 | 1.92 | 1.81 | -0.13 | 1 | 52.53 | MUT | NA  |
| XELOX+Bevacizumab | 3.17 | 2.92 | 3.60 | 2.77 | 1.85 | 2.09 | 1.28  | 0 | 60.52 | WT  | NA  |
| XELOX+Bevacizumab | 3.24 | 2.69 | 3.47 | 2.26 | 2.12 | 2.46 | 1.20  | 0 | 69.52 | NA  | WT  |
| XELOX+Bevacizumab | 3.31 | 2.77 | 3.27 | 2.86 | 2.25 | 1.95 | 1.46  | 0 | 79.08 | MUT | WT  |
| XELOX+Bevacizumab | 3.16 | 2.87 | 3.40 | 2.74 | 1.72 | 1.75 | 0.20  | 0 | 74.94 | WT  | NA  |
| XELOX+Bevacizumab | 3.14 | 2.63 | 3.32 | 2.41 | 1.96 | 1.98 | 0.04  | 0 | 84.14 | WT  | NA  |
| XELOX+Bevacizumab | 3.02 | 2.66 | 3.10 | 2.19 | 2.29 | 2.51 | 0.62  | 0 | 82.83 | WT  | NA  |
| XELOX+Bevacizumab | 3.45 | 2.90 | 3.47 | 2.88 | 1.96 | 1.97 | 1.63  | 0 | 67.98 | WT  | MUT |
| XELOX+Bevacizumab | 3.81 | 3.18 | 3.59 | 2.99 | 2.76 | 2.33 | 4.79  | 1 | 38.67 | WT  | WT  |
| XELOX+Bevacizumab | 3.29 | 3.22 | 3.15 | 3.06 | 2.11 | 2.03 | 1.99  | 0 | 60.45 | WT  | NA  |
| XELOX+Bevacizumab | 2.65 | 2.59 | 2.84 | 1.88 | 1.81 | 2.16 | -2.08 | 0 | 83.38 | WT  | NA  |
| XELOX+Bevacizumab | 3.59 | 2.81 | 3.26 | 2.82 | 1.88 | 1.83 | 0.96  | 0 | 75.79 | WT  | NA  |
| XELOX+Bevacizumab | 3.04 | 2.77 | 3.19 | 2.42 | 2.27 | 2.04 | 0.61  | 0 | 60.58 | WT  | WT  |
| XELOX+Bevacizumab | 3.05 | 2.61 | 3.14 | 2.15 | 2.08 | 2.14 | -0.26 | 0 | 68.7  | NA  | WT  |
| XELOX+Bevacizumab | 3.28 | 2.88 | 3.26 | 2.47 | 1.94 | 2.49 | 1.16  | 0 | 65.97 | WT  | MUT |
| XELOX+Bevacizumab | 3.31 | 2.69 | 3.09 | 2.48 | 2.09 | 2.39 | 0.85  | 0 | 78.19 | WT  | MUT |
| XELOX+Bevacizumab | 2.92 | 2.43 | 3.38 | 2.29 | 2.19 | 2.01 | -0.13 | 1 | 8.87  | WT  | WT  |
| XELOX+Bevacizumab | 3.25 | 2.67 | 3.50 | 2.31 | 1.98 | 2.12 | 0.60  | 0 | 59.63 | WT  | MUT |
| XELOX+Bevacizumab | 3.50 | 3.24 | 3.43 | 3.09 | 2.06 | 1.83 | 2.42  | 0 | 77.4  | WT  | MUT |
| XELOX+Bevacizumab | 3.02 | 2.89 | 3.36 | 2.47 | 1.89 | 2.23 | 0.57  | 0 | 65.84 | WT  | NA  |
| XELOX+Bevacizumab | 2.94 | 2.67 | 3.30 | 2.55 | 2.14 | 2.12 | 0.47  | 0 | 77.7  | WT  | NA  |
| XELOX+Bevacizumab | 3.01 | 2.63 | 3.24 | 2.92 | 2.19 | 2.03 | 0.84  | 0 | 61.9  | WT  | WT  |
| XELOX+Bevacizumab | 2.43 | 2.47 | 3.09 | 2.53 | 1.88 | 1.59 | -1.99 | 0 | 82.4  | WT  | MUT |
| XELOX+Bevacizumab | 3.16 | 3.05 | 3.34 | 2.90 | 2.23 | 2.11 | 2.00  | 0 | 79.9  | WT  | MUT |
| XELOX+Bevacizumab | 2.85 | 2.40 | 2.95 | 1.62 | 1.92 | 2.03 | -2.19 | 0 | 87.89 | WT  | NA  |
| XELOX+Bevacizumab | 3.36 | 2.92 | 3.13 | 2.52 | 2.03 | 2.76 | 1.70  | 0 | 63.51 | WT  | MUT |
| XELOX+Bevacizumab | 3.30 | 2.92 | 2.99 | 2.72 | 2.18 | 2.22 | 1.28  | 0 | 78.46 | WT  | MUT |
| XELOX+Bevacizumab | 2.90 | 2.37 | 2.94 | 1.54 | 1.86 | 2.30 | -2.05 | 0 | 78.03 | WT  | NA  |
| XELOX+Bevacizumab | 2.66 | 2.68 | 3.09 | 2.20 | 1.97 | 2.24 | -0.80 | 0 | 84.96 | WT  | NA  |
| XELOX+Bevacizumab | 3.06 | 2.92 | 3.22 | 2.57 | 1.64 | 2.45 | 0.36  | 0 | 79.7  | WT  | MUT |
| XELOX+Bevacizumab | 3.42 | 2.91 | 2.91 | 2.69 | 1.96 | 2.55 | 1.24  | 0 | 58.22 | WT  | MUT |
| XELOX+Bevacizumab | 3.44 | 3.05 | 3.40 | 2.94 | 1.99 | 2.29 | 2.27  | 0 | 73    | WT  | MUT |
| XELOX+Bevacizumab | 2.45 | 2.43 | 2.74 | 2.36 | 1.86 | 1.36 | -3.05 | 0 | 82.56 | WT  | MUT |
| XELOX+Bevacizumab | 3.34 | 2.67 | 3.21 | 2.26 | 2.40 | 2.38 | 1.36  | 1 | 31.84 | WT  | MUT |
| XELOX+Bevacizumab | 2.47 | 2.32 | 2.98 | 2.63 | 1.90 | 1.70 | -2.02 | 0 | 85.78 | WT  | NA  |
| XELOX+Bevacizumab | 3.17 | 2.98 | 3.38 | 2.92 | 2.07 | 2.06 | 1.61  | 0 | 66.53 | WT  | WT  |
| XELOX+Bevacizumab | 2.82 | 2.44 | 2.96 | 2.21 | 1.72 | 1.53 | -2.45 | 0 | 83.55 | WT  | MUT |
| XELOX+Bevacizumab | 3.31 | 2.99 | 3.40 | 2.71 | 1.80 | 1.94 | 0.93  | 0 | 73.66 | WT  | MUT |
| XELOX+Bevacizumab | 3.01 | 2.59 | 3.19 | 2.51 | 1.92 | 1.98 | -0.35 | 0 | 63.05 | WT  | NA  |
| XELOX+Bevacizumab | 3.15 | 3.19 | 3.24 | 2.61 | 2.31 | 1.88 | 1.57  | 0 | 78.69 | WT  | WT  |
| XELOX+Bevacizumab | 2.83 | 2.58 | 3.34 | 2.53 | 1.78 | 1.95 | -0.66 | 0 | 71.92 | WT  | WT  |
| XELOX+Bevacizumab | 3.13 | 2.87 | 3.34 | 2.63 | 2.18 | 2.08 | 1.24  | 0 | 78.92 | WT  | MUT |

|                   |      |      |      |      |      |      |       |   |       |     |     |
|-------------------|------|------|------|------|------|------|-------|---|-------|-----|-----|
| XELOX+Bevacizumab | 3.51 | 2.92 | 3.36 | 2.52 | 2.49 | 2.02 | 2.22  | 0 | 76.19 | MUT | NA  |
| XELOX+Bevacizumab | 3.22 | 2.90 | 3.34 | 2.52 | 1.73 | 2.26 | 0.61  | 0 | 59.86 | WT  | MUT |
| XELOX+Bevacizumab | 2.77 | 2.88 | 3.29 | 2.45 | 1.78 | 1.84 | -0.59 | 0 | 60.78 | WT  | WT  |
| XELOX+Bevacizumab | 2.97 | 2.67 | 3.32 | 2.54 | 2.03 | 2.16 | 0.37  | 0 | 81.87 | WT  | NA  |
| XELOX+Bevacizumab | 2.91 | 3.04 | 3.32 | 2.27 | 1.81 | 2.52 | 0.55  | 0 | 78.85 | MUT | NA  |
| XELOX+Bevacizumab | 3.02 | 2.76 | 3.22 | 2.48 | 1.91 | 1.61 | -0.53 | 0 | 85.42 | WT  | NA  |
| XELOX+Bevacizumab | 2.81 | 2.91 | 3.13 | 2.61 | 1.94 | 2.61 | 0.72  | 0 | 80.59 | WT  | WT  |
| XELOX+Bevacizumab | 2.94 | 2.83 | 3.34 | 3.05 | 2.16 | 1.73 | 0.94  | 1 | 83.15 | WT  | MUT |
| XELOX+Bevacizumab | 3.10 | 2.30 | 3.31 | 2.57 | 2.21 | 2.24 | 0.43  | 0 | 64.23 | MUT | NA  |
| XELOX+Bevacizumab | 2.99 | 2.90 | 3.45 | 2.88 | 1.90 | 1.85 | 0.71  | 0 | 83.71 | WT  | WT  |
| XELOX+Bevacizumab | 3.31 | 2.89 | 3.21 | 2.73 | 1.88 | 2.63 | 1.52  | 0 | 67.81 | WT  | MUT |
| XELOX+Bevacizumab | 3.24 | 2.91 | 3.05 | 2.73 | 1.92 | 2.00 | 0.53  | 0 | 82.99 | WT  | MUT |

**Supplementary Table 13: Individual MAPK gene expression, MPAS and overall survival of patients with CRC in the adjuvant setting (AVANT).**
